# Supplementary material for: Epidemiology, aetiology and seasonality of infectious diarrhoea in adult outpatients through active surveillance in Shanghai, China, 2012–2016: a cross-sectional study
Source: PubMed Central journal article supplement — BMJ Open. 2018 Sep 4;8(9):e019699. doi: 10.1136/bmjopen-2017-019699 (PMC6129037; doi:10.1136/bmjopen-2017-019699), 2018-09-04
Supplement: bmjopen-2017-019699.draft_revisions.pdf [file bmjopen-2017-019699.draft_revisions.pdf]

# BMJ Open

BMJ Open is committed to open peer review. As part of this commitment we make the peer review history of every article we publish publicly available.

When an article is published we post the peer reviewers' comments and the authors' responses online. We also post the versions of the paper that were used during peer review. These are the versions that the peer review comments apply to.

The versions of the paper that follow are the versions that were submitted during the peer review process. They are not the versions of record or the final published versions. They should not be cited or distributed as the published version of this manuscript.

BMJ Open is an open access journal and the full, final, typeset and author-corrected version of record of the manuscript is available on our site with no access controls, subscription charges or pay-per-view fees (<http://bmjopen.bmj.com>).

If you have any questions on BMJ Open's open peer review process please email [info.bmjopen@bmj.com](mailto:info.bmjopen@bmj.com)

# BMJ Open

## Epidemiology, etiology and seasonality of infectious diarrhea in adult outpatients through active surveillance in Shanghai, China, 2012-2016

|                                 |                                                                                                                                                                                                                                                                                                                                                                                                                                                                                                                                                                                                                                                                                                                                                                                                                                                                                                                                                                                                                                                                                |
|---------------------------------|--------------------------------------------------------------------------------------------------------------------------------------------------------------------------------------------------------------------------------------------------------------------------------------------------------------------------------------------------------------------------------------------------------------------------------------------------------------------------------------------------------------------------------------------------------------------------------------------------------------------------------------------------------------------------------------------------------------------------------------------------------------------------------------------------------------------------------------------------------------------------------------------------------------------------------------------------------------------------------------------------------------------------------------------------------------------------------|
| Journal:                        | <i>BMJ Open</i>                                                                                                                                                                                                                                                                                                                                                                                                                                                                                                                                                                                                                                                                                                                                                                                                                                                                                                                                                                                                                                                                |
| Manuscript ID                   | bmjopen-2017-019699                                                                                                                                                                                                                                                                                                                                                                                                                                                                                                                                                                                                                                                                                                                                                                                                                                                                                                                                                                                                                                                            |
| Article Type:                   | Research                                                                                                                                                                                                                                                                                                                                                                                                                                                                                                                                                                                                                                                                                                                                                                                                                                                                                                                                                                                                                                                                       |
| Date Submitted by the Author:   | 20-Sep-2017                                                                                                                                                                                                                                                                                                                                                                                                                                                                                                                                                                                                                                                                                                                                                                                                                                                                                                                                                                                                                                                                    |
| Complete List of Authors:       | Gong, Xiaohuan; Shanghai Municipal Center for Disease Control and Prevention, Division of Infectious Disease Control and Prevention<br>Wu, Huan-yu; Shanghai Municipal Center for Disease Control and Prevention, Division of Infectious Disease Control and Prevention<br>Li, Jian; Shanghai Municipal Center for Disease Control and Prevention, Division of Infectious Disease Control and Prevention<br>Xiao, Wen-jia; Shanghai Municipal Center for Disease Control and Prevention, Division of Infectious Disease Control and Prevention<br>Zhang, Xi; Shanghai Municipal Center for Disease Control and Prevention, Microbiology Laboratory<br>Chen, Min; Shanghai Municipal Center for Disease Control and Prevention, Microbiology Laboratory<br>Teng, Zheng; Shanghai Municipal Center for Disease Control and Prevention, Microbiology Laboratory<br>Pan, Hao; Shanghai Municipal Center for Disease Control and Prevention, Division of Infectious Disease Control and Prevention<br>Yuan, Zheng-an ; Shanghai Municipal Center for Disease Control and Prevention |
| <b>Primary Subject Heading</b>: | Public health                                                                                                                                                                                                                                                                                                                                                                                                                                                                                                                                                                                                                                                                                                                                                                                                                                                                                                                                                                                                                                                                  |
| Secondary Subject Heading:      | Epidemiology                                                                                                                                                                                                                                                                                                                                                                                                                                                                                                                                                                                                                                                                                                                                                                                                                                                                                                                                                                                                                                                                   |
| Keywords:                       | INFECTIOUS DISEASES, BACTERIOLOGY, VIROLOGY                                                                                                                                                                                                                                                                                                                                                                                                                                                                                                                                                                                                                                                                                                                                                                                                                                                                                                                                                                                                                                    |
|                                 |                                                                                                                                                                                                                                                                                                                                                                                                                                                                                                                                                                                                                                                                                                                                                                                                                                                                                                                                                                                                                                                                                |

SCHOLARONE™  
Manuscripts

1  
2  
3  
4 **Epidemiology, etiology and seasonality of infectious**  
5 **diarrhea in adult outpatients through active**  
6 **surveillance in Shanghai, China, 2012-2016**  
7  
8  
9  
10  
11  
12  
13

14 Xiao-huan Gong<sup>†</sup>, Huan-yu Wu<sup>†</sup>, Jian Li, Wen-jia Xiao, Xi Zhang, Min Chen, Zheng  
15 Teng, Hao Pan<sup>\*</sup>, Zheng-an Yuan<sup>\*</sup>  
16  
17  
18  
19  
20

21 <sup>†</sup> Equal contributor: Xiao-huan Gong, Huan-yu Wu  
22

23 <sup>\*</sup> Corresponding author:  
24

25  
26 Zheng-an Yuan  
27

28 Email: yuanzhengan@scdc.sh.cn; Phone:+86 21 62758710  
29

30  
31 Hao Pan  
32

33 Email: panhao@scdc.sh.cn; Phone:+86 21 62758710  
34  
35  
36  
37

38 Division of Infectious Disease Control and Prevention, Shanghai Municipal Center  
39 for Disease Control and Prevention, No. 1380, West Zhongshan Road, Shanghai  
40 200336, China.  
41  
42  
43  
44

45 **Key Words:**  
46

47 Diarrhea, Surveillance, Epidemiology, Etiology, Sporadic, Bacteria, Virus, China  
48  
49

50  
51 **Words Count: 3884**  
52  
53  
54

55 Email addresses:  
56  
57

1  
2  
3 Xiao-huan Gong: [gloriag1988@163.com](mailto:gloriag1988@163.com)  
4

5  
6 Huan-yu Wu: [wuhuanyu@scdc.sh.cn](mailto:wuhuanyu@scdc.sh.cn)  
7

8  
9 Jian Li: [lijian@scdc.sh.cn](mailto:lijian@scdc.sh.cn)  
10

11 Wen-jia Xiao: [xiaowenjia@scdc.sh.cn](mailto:xiaowenjia@scdc.sh.cn)  
12

13 Xi Zhang: [zhangxi@scdc.sh.cn](mailto:zhangxi@scdc.sh.cn)  
14

15  
16 Min Chen: [chenmin@scdc.sh.cn](mailto:chenmin@scdc.sh.cn)  
17

18 Zheng Teng: [tengzheng@scdc.sh.cn](mailto:tengzheng@scdc.sh.cn)  
19

20  
21 Hao Pan: [panhao@scdc.sh.cn](mailto:panhao@scdc.sh.cn)  
22

23 Zheng-an Yuan: [yuanzhengan@scdc.sh.cn](mailto:yuanzhengan@scdc.sh.cn)  
24  
25  
26  
27  
28  
29  
30  
31  
32  
33  
34  
35  
36  
37  
38  
39  
40  
41  
42  
43  
44  
45  
46  
47  
48  
49  
50  
51  
52  
53  
54  
55  
56  
57  
58  
59  
60

## ABSTRACT

### Objectives

This study aimed to identify the epidemiology, clinical characteristics, etiology and seasonality of sporadic infectious diarrhea in adults in Shanghai.

### Setting

This study was based on a citywide, active continuous hospital-based diarrhea surveillance network established by Shanghai CDC. There were 22 sentinel hospitals in all 16 districts (9 primary-level hospitals, 6 secondary-level hospitals and 7 tertiary-level hospitals), which were selected using PPS sampling method.

### Participants

From 1 May 2012 through 31 May 2016, 95284 patients were enrolled in surveillance system, of whom 90713 were included in this study. Among 8797 patients whose stool samples were collected and detected, 4392 patients were male.

### Results

The positive rate was 47.96%. Bacterial and viral infections accounted for 27.19% and 69.07% separately. Norovirus was the most common pathogen (43.10%), followed by rotavirus, *V. parahaemolyticus*, DEC and *Salmonella* spp.. Patients between 30-44 and 45-59 years were more vulnerable to infectious diarrhea and viral diarrhea. Those aged 30-44 years were the most vulnerable to *V. parahaemolyticus* (aOR versus 60+ years: 2.04 [1.47-2.78]) and norovirus (aOR versus 60+ years: 1.32

1  
2  
3 [1.12-1.56]). Bacterial (except *V. parahaemolyticus*) diarrhea was characterized by  
4 fever, abdominal pain and loose stool; whilst viral diarrhea was characterized by  
5  
6 nausea, vomiting and watery stool. A seasonal distribution of infectious diarrhea was  
7  
8 observed with larger peaks in winter and smaller peaks in summer. Winter peaks were  
9  
10 mainly due to norovirus and rotavirus, and summer peaks were due to bacterial  
11  
12 infections. An emerging spring peak of norovirus around March was observed in the  
13  
14 past 3 years.  
15  
16  
17  
18  
19  
20

## 21 **Conclusion**

22  
23  
24 Viral infections were predominant, and norovirus played a leading role. A seasonal  
25  
26 distribution was observed and an emerging spring peak of norovirus was noted. Our  
27  
28 findings highlight the necessity for conducting an active, comprehensive surveillance  
29  
30 in adults, to monitor changing dynamics in the epidemiology and etiology of  
31  
32 infectious diarrhea.  
33  
34  
35  
36

## 37 **Key Words**

38  
39  
40 Diarrhea, Surveillance, Epidemiology, Etiology, Sporadic, Bacteria, Virus, China  
41  
42  
43  
44  
45  
46  
47  
48  
49  
50  
51  
52  
53  
54  
55  
56  
57  
58  
59  
60

## Strengths and limitations of this study

- ✧ This is the first study in Shanghai identifying the etiology and epidemiology of adult infectious diarrhea in sporadic outpatients from a continuous active diarrhea surveillance enhanced with comprehensive laboratory testing for common enteric bacteria and virus.
- ✧ Etiology of adult infectious diarrhea in Shanghai, including bacteria and virus, was detailed in this study.
- ✧ Seasonality of adult infectious diarrhea and relevant contribution of different enteric pathogens in seasonal trend were demonstrated in detail.
- ✧ Since information and detection results were collected from 22 hospitals and 16 laboratories, there was a chance of bias caused by the different levels and conditions of hospitals and laboratories. Also admission rate bias and recall bias was difficult to avoid.
- ✧ Only mild diarrhea patients were included in surveillance, severe diarrhea patients or asymptomatic patients were not studied in our research.
- ✧ As for seasonality, only descriptive data of every month or statistical tests of seasons were demonstrated. No statistical methods were used to analyze the successive time series.

## BACKGROUND

Diarrhea is generally characterized by the frequent passage of loose or liquid stools. It is usually a symptom of gastrointestinal infections caused by bacterial, viral or parasitic pathogens, which spread through contaminated food or drinking-water or from person-to-person[1]. According to WHO, rotavirus and *Diarrheogenic Escherichia coli* (DEC) are the two most common etiological agents of diarrhea in developing countries[1]. However, norovirus was found the most prevalent pathogen of infectious diarrhea in adults in China CDC's research[2], and *Vibrio parahaemolyticus* (*V. parahaemolyticus*) was the most common enteric pathogen in acute bacterial gastroenteritis[3]. The etiology of infectious diarrhea differs among regions depending on economic development, local climate and geography [4, 5].

Nearly 1.7 billion cases and 1.3 million deaths due to diarrhea occur worldwide every year.[1, 6] Diarrhea causes substantial medical and healthcare costs and thus has a high economic impact on society[7]. Diarrhea remains one of the major causes of disease burden worldwide, despite significant progress in sanitation status and public health awareness. Mortality due to diarrhea fell 20% in recent 10 years, while it is still leading common cause of life loss (ranking fifth) globally[6]. To react to this worldwide health issue, we established the Shanghai Diarrhea Comprehensive Surveillance System since 2012, which is an active continuous surveillance system and which this research is based on.

Most of current studies of diarrhea have focused on children under 5 years old[8-12].. Consequently, limited data about the epidemiology and etiology of infectious diarrhea



1  
2  
3 in adults is available[13-15]. Although diarrhea accounts for only 2% deaths of  
4  
5 adults[16], they may play a role in enteric infection transmission to other susceptible  
6  
7 populations such as immunocompromised patients. Furthermore, there is rare research  
8  
9 on the etiology of infectious diarrhea in adults in China[2, 3, 17, 18], especially based  
10  
11 on a continuous active surveillance with comprehensive laboratory detection of  
12  
13 enteric bacteria and viruses. Better understanding to the epidemiology, etiology and  
14  
15 seasonality of infectious diarrhea in adults would be valuable for planning and  
16  
17 adopting targeted preventive measures and antimicrobial therapy.  
18  
19  
20  
21

22  
23 The objective of this study was to identify the epidemiology, clinical characteristics,  
24  
25 etiology and pathogen seasonality of infectious diarrhea in adult sporadic outpatients  
26  
27 through an active continuous hospital-based diarrhea surveillance in Shanghai, and to  
28  
29 explore to develop targeted policy of disease prevention and control in the future.  
30  
31  
32

## 33 **METHODS**

### 34 **Shanghai Diarrhea Comprehensive Surveillance System**

35  
36  
37 The Shanghai Diarrhea Comprehensive Surveillance System conducts active,  
38  
39 population-based surveillance on diarrhea outpatients. It consists of adult surveillance  
40  
41 and children surveillance. The adult surveillance was established with 6 sentinel  
42  
43 hospitals in May 2012, and incorporated 16 additional sentinel hospitals in August  
44  
45 2013. Municipal CDC, district CDCs and sentinel hospitals cooperate to maintain the  
46  
47 surveillance, and share information and detection results through a dedicated online  
48  
49 system. The 22 sentinel hospitals (9 primary-level hospitals, 6 secondary-level  
50  
51  
52  
53  
54  
55  
56  
57

1  
2  
3 hospitals and 7 tertiary-level hospitals) were selected using Probability Proportionate  
4 to Size (PPS) sampling method among all hospitals which had enteric disease clinics  
5  
6 in all 16 districts of Shanghai. Different sampling intervals were allocated to different  
7  
8 sentinel hospitals considering the hospitals' location, classification and annual number  
9  
10 of diarrhea patients comprehensively, for use of collecting fecal specimens.  
11  
12

13  
14  
15 Surveillance subjects were defined as patients who visited the enteric disease clinics  
16  
17 of sentinel hospitals, with 3 or more loose or liquid stools per day, or more frequently  
18  
19 than normal for the individual (World Health Organization's definition of  
20  
21 diarrhea)[19]. All surveillance subjects were interviewed by doctors using a  
22  
23 standardized questionnaire in hospitals. Demographic, epidemiological and medical  
24  
25 information of all surveillance subjects was obtained and recorded into the dedicated  
26  
27 online system. Epidemiologically-linked outbreak cases were excluded via inquiry.  
28  
29  
30  
31  
32

### 33 34 **Laboratory Tests**

35  
36 Fecal specimens were collected from surveillance subjects in accordance with  
37  
38 sampling intervals by trained medical staff, as a part of standard medical care. If the  
39  
40 sampling interval of a sentinel hospital is X, then fecal specimens are collected from  
41  
42 the Xth, 2Xth, 3Xth,...nXth surveillance subjects in this sentinel hospital.  
43  
44  
45 Approximately 8~10g (mL) of stool was collected and then dispensed into two  
46  
47 containers: (1) a tube with Cary-Blair (C-B) culture medium for bacteria testing and  
48  
49 (2) a sterile plastic cup for virus testing. Nucleic Acid was extracted from fecal  
50  
51 specimens (20% w/v or v/v suspensions in PBS) using the QIAamp Viral RNA Mini  
52  
53 Kit (Qiagen, Hilden, Germany).  
54  
55  
56  
57

1  
2  
3 All specimens were detected for 8 bacterial pathogens [*Vibrio cholera* (*V. cholera*),  
4 *Shigella* spp., *Salmonella* spp., *V. parahaemolyticus*, *Campylobacter jejuni* (*C. jejuni*),  
5  
6 *Yersinia enterocolitica* (*Y. enterocolitica*), *Campylobacter coli* (*C. coli*), DEC  
7  
8 (including EPEC, ETEC, EHEC, EAaggEC, EIEC)], and 5 viral pathogens (norovirus,  
9  
10 rotavirus, astrovirus, sapovirus, and adenovirus). Bacteria were isolated using  
11  
12 different mediums at proper temperatures after preparation. The mediums included  
13  
14 ChromID *Vibrio* and TCBS for *V. cholera* and *V. parahaemolyticus*, MAC for DEC,  
15  
16 XLD for *Shigella* spp. and *Salmonella* spp., etc.. Bacteria were identified using  
17  
18 biochemical tests. An automatic biochemical identification system was used for DEC.  
19  
20 Serum agglutination tests were employed to subtype *Shigella* spp., *Salmonella* spp., *V.*  
21  
22 *cholera* and DEC. Astrovirus, norovirus, sapovirus and rotavirus were detected using  
23  
24 real-time reverse transcription- polymerase chain reaction assays (rRT-PCR) and  
25  
26 adenovirus was detected using rPCR. All molecular assays were performed using the  
27  
28 appropriate respective commercial kits (Shanghai Zhijiang Biotechnology Co., Ltd.)  
29  
30 according to the manufacturer's instructions.  
31  
32  
33  
34  
35  
36  
37  
38  
39

40 Samples were scored as positive if at least one of enteric pathogens was isolated or  
41  
42 identified. A bacterial infection means enteric bacteria was isolated and no viruses  
43  
44 were identified. A viral infection means enteric virus was identified and no bacteria  
45  
46 were isolated. Samples were scored as simplex infection if one of the 13 enteric  
47  
48 pathogens was isolated or identified; as a mixed infection if at least two of these  
49  
50 pathogens were isolated or identified; as a bacterial-viral mixed infection if at least  
51  
52 one bacteria was isolated and one virus was identified.  
53  
54  
55  
56

## Statistical Analysis

Data were analyzed using Statistical Analysis Software (SAS) version 9.3. Numbers and percentages were computed for categorical variables. Cochren-Mantel-Haenszel test was used for comparison of categorical variables. Binary logistic model and general logit model were used for binary dependent variables and multi-category disordered dependent variables respectively, to calculated adjusted odds ratio (aOR) and to explore the association between etiology and characteristics of infectious diarrhea after adjusting for confounders. Variables of age group, suburb, gender, season, and epidemiological histories were put into model and selected by stepwise methods. Two-tailed p values < 0.05 was considered statistically significant.

This study focused on the adult diarrhea patients with age  $\geq 18$  years. Age group was defined as 18-29,30-44, 45-59, and 60+ years, according to the Global Burden of Disease 2000 and surveillance diarrhea patients 'age distribution[20]. Season was defined by the climatic characteristics of Shanghai, spring means March to May, and summer means June to August, and autumn means September to November, and winter means December to February.

## Ethics

The study protocol was approved by the Institutional Ethics Review Committee of the Shanghai Municipal Center for Disease Control and Prevention.

## RESULTS

From 1 May 2012 through 31 May 2016, a total of 95284 patients were enrolled in

1  
2  
3  
4 Shanghai diarrhea comprehensive surveillance system, of whom 4571 (4.80%) were  
5  
6 not included in this study for the following reasons: 401 (0.42%) patients did not  
7  
8 report clinical signs of diarrhea, 379 (0.40%) patients visited the enteric disease  
9  
10 clinics within 14 days and thus were considered as the same episodes, 11 (0.01%)  
11  
12 patients sought clinical care > 60 days after onset of diarrhea, 212 (0.22%) patients  
13  
14 were not infectious diarrhea with other explicit diagnosis, and 3568 (3.74%) patients  
15  
16 were younger than 18 years. Among 90713 adult diarrhea patients, 8797 (9.70%)  
17  
18 patients' stool samples were collected and detected. These 8797 patients were  
19  
20 included for further analysis.  
21  
22  
23  
24  
25

### 26 **1. Prevalence of Enteric Bacteria and Viruses**

27  
28  
29 A total of 4657 pathogens were identified or isolated from 4219 (positive rate 47.96%)  
30  
31 stool samples of the 8797 samples. There are 1147 bacterial infections (27.19%), 2914  
32  
33 viral infections (69.07%) and 158 bacterial-viral mixed infections (infected with at  
34  
35 least 1 bacteria and 1 virus, 3.74%). Excluding mixed-infection samples, *V.*  
36  
37 *parahaemolyticus* infections, DEC infections and *Salmonella* spp. infections were the  
38  
39 most frequently bacterial infections, respectively with positive rate 4.50%, 3.43% and  
40  
41 2.90%. Excluding mixed-infection samples, norovirus infections and rotavirus  
42  
43 infections were the most frequently viral infections, with positive rates 19.82% and  
44  
45 8.12%, respectively. Positive rates of other enteric viral infections were as follows:  
46  
47 sapovirus, 1.93%; astrovirus, 1.56%; and adenovirus, 0.35%. Positive rates of enteric  
48  
49 bacterial infections were as follows: *C.jejuni*, 1.13%; *Shigella* spp., 0.22%; *C. coli*,  
50  
51 0.08%; *Y. enterocolitica*, 0.01%; and *Staphylococcus aureus*, 0.01%. In addition, there  
52  
53  
54  
55  
56  
57  
58  
59  
60

1  
2  
3 were 343 (3.90%) mixed infections.  
4

5  
6 Isolated DEC consisted of 216 ETEC, 131 EPEC, 84 EAggEC, 2 EIEC and 1 EHEC.  
7

8 Identified noroviruses consisted of 281 GI and 1726 GII. Identified rotaviruses  
9 consisted of 766 rotavirus group A, 6 rotavirus group B and 15 rotavirus group C.  
10  
11  
12

## 13 14 **2. Demographic and Epidemiological Characteristics** 15

16 The median age was 46 (IQR 30-60) years. Of 8797 patients, 22.94% aged 18-29  
17 years, 24.57% aged 30-44 years, 25.79% aged 45-59 years, and 26.70% aged equal to  
18 or older than 60 years. A significantly difference in distribution of age groups could  
19 be found among comparison of positive and negative diarrhea patients ( $p=0.0150$ ),  
20 comparison of bacterial and viral and bacterial-viral infections ( $p=0.0074$ ), and  
21 comparison of different enteric pathogens infections ( $p<0.0001$ ) (Table 1). There were  
22 4392 (49.93%) male patients, with a higher male proportion in positive diarrhea  
23 patients ( $p=0.0472$ ), DEC infections (aOR=1.29, 95%CI=1.02-1.64) and norovirus  
24 infections (aOR=1.22, 95%CI=1.08-1.36) (Table 1 and Table 2).  
25  
26  
27  
28  
29  
30  
31  
32  
33  
34  
35  
36  
37  
38  
39  
40  
41  
42  
43  
44  
45  
46  
47  
48  
49  
50  
51  
52  
53  
54  
55  
56  
57  
58  
59  
60

Table 1 Demographic and epidemiological characteristics of diarrhea outpatient adults by different infections

|                                                               | Positive<br>(n=4219) | Negative<br>(n=4578) | <i>P</i>          | Bacterial<br>infections<br>(n=1147) | Viral<br>infections<br>(n=2914) | Bacterial-viral<br>Mixed<br>infections<br>(n=158) | <i>P</i>      | <i>V. parahaemolyticus</i> <sup>§</sup><br>(n=396) | DEC <sup>§</sup><br>(n=302) | <i>Salmonella</i><br>spp. <sup>§</sup><br>(n=255) | Norovirus <sup>§</sup><br>(n=1744) | Rotavirus <sup>§</sup><br>(n=714) | Other<br>infections <sup>§</sup><br>(n=808) | <i>P</i>          |
|---------------------------------------------------------------|----------------------|----------------------|-------------------|-------------------------------------|---------------------------------|---------------------------------------------------|---------------|----------------------------------------------------|-----------------------------|---------------------------------------------------|------------------------------------|-----------------------------------|---------------------------------------------|-------------------|
| Gender, N (%)                                                 |                      |                      |                   |                                     |                                 |                                                   |               |                                                    |                             |                                                   |                                    |                                   |                                             |                   |
| Male                                                          | 2153 (51.03)         | 2239 (48.91)         | <b>0.0472</b>     | 577 (50.31)                         | 1497 (51.37)                    | 79 (50.00)                                        | 0.8005        | 184 (46.46)                                        | 164 (54.30)                 | 128 (50.20)                                       | 946 (54.24)                        | 326 (45.66)                       | 405 (50.12)                                 | <b>0.0011</b>     |
| Age, N (%)                                                    |                      |                      |                   |                                     |                                 |                                                   |               |                                                    |                             |                                                   |                                    |                                   |                                             |                   |
| 18-29 years                                                   | 941 (22.32)          | 1074 (23.52)         | <b>0.0150</b>     | 292 (25.48)                         | 611 (20.97)                     | 38 (24.20)                                        | <b>0.0074</b> | 109 (27.53)                                        | 74 (24.50)                  | 43 (16.93)                                        | 384 (22.03)                        | 118 (16.53)                       | 213 (26.39)                                 | <b>&lt;0.0001</b> |
| 30-44 years                                                   | 1084 (25.71)         | 1074 (23.52)         |                   | 298 (26.00)                         | 748 (25.68)                     | 38 (24.20)                                        |               | 119 (30.05)                                        | 72 (23.84)                  | 57 (22.44)                                        | 473 (27.14)                        | 158 (22.13)                       | 205 (25.40)                                 |                   |
| 45-59 years                                                   | 1112 (26.38)         | 1153 (25.25)         |                   | 294 (25.65)                         | 768 (26.36)                     | 50 (31.85)                                        |               | 105 (26.52)                                        | 78 (25.83)                  | 76 (29.92)                                        | 426 (24.44)                        | 231 (32.35)                       | 196 (24.29)                                 |                   |
| 60+ years                                                     | 1079 (25.59)         | 1266 (27.72)         |                   | 262 (22.86)                         | 786 (26.98)                     | 31 (19.75)                                        |               | 63 (15.91)                                         | 78 (25.83)                  | 78 (30.71)                                        | 460 (26.39)                        | 207 (28.99)                       | 193 (23.92)                                 |                   |
| Living region, N (%)                                          |                      |                      |                   |                                     |                                 |                                                   |               |                                                    |                             |                                                   |                                    |                                   |                                             |                   |
| Suburb                                                        | 2401 (56.91)         | 2975 (64.98)         | <b>&lt;0.0001</b> | 665 (57.98)                         | 1645 (56.45)                    | 91 (57.59)                                        | 0.6661        | 257 (64.90)                                        | 170 (56.29)                 | 149 (58.43)                                       | 1019 (58.43)                       | 403 (56.44)                       | 403 (49.88)                                 | <b>&lt;0.0001</b> |
| Epidemiological history, N (%)                                |                      |                      |                   |                                     |                                 |                                                   |               |                                                    |                             |                                                   |                                    |                                   |                                             |                   |
| Had a medical history of enteric disease in the past 6 months | 17 (0.40)            | 47 (1.03)            | <b>0.0006</b>     | 5 (0.44)                            | 12 (0.41)                       | 0 (0.00)                                          | 0.7132        | 1 (0.25)                                           | 1 (0.33)                    | 2 (0.78)                                          | 8 (0.46)                           | 2 (0.28)                          | 3 (0.37)                                    | 0.9001            |
| Had consumed suspicious food within 5 days before onset       | 1914 (45.37)         | 1865 (40.74)         | <b>&lt;0.0001</b> | 490 (42.72)                         | 1350 (46.33)                    | 74 (46.84)                                        | 0.1073        | 179 (45.20)                                        | 111 (36.75)                 | 117 (45.88)                                       | 847 (48.57)                        | 282 (39.50)                       | 378 (46.78)                                 | <b>&lt;0.0001</b> |
| Had went out within 7 days before onset                       | 78 (1.85)            | 46 (1.00)            | <b>0.0010</b>     | 29 (2.53)                           | 48 (1.65)                       | 1 (0.63)                                          | 0.0881        | 7 (1.77)                                           | 8 (2.65)                    | 5 (1.96)                                          | 34 (1.95)                          | 6 (0.84)                          | 18 (2.23)                                   | 0.3226            |
| Had kept or had contact with pets.                            | 814 (19.29)          | 604 (13.19)          | <b>&lt;0.0001</b> | 224 (19.53)                         | 556 (19.08)                     | 34 (21.52)                                        | 0.7304        | 55 (13.89)                                         | 65 (21.52)                  | 41 (16.08)                                        | 323 (18.52)                        | 123 (17.23)                       | 207 (25.62)                                 | <b>&lt;0.0001</b> |

§ Simplex infections;

Bold face:  $P < 0.05$

**Table 2 Adjusted odds ratio of demographic and epidemiological characteristics comparing positive detection with negative detection in diarrhea outpatients\***

|                                                               | Positive<br>(n=4219)    | Bacterial infections<br>(n=1147) | Viral infections<br>(n=2914) | Bacterial-viral<br>Mixed infections<br>(n=158) | <i>V. parahaemolyticus</i> <sup>§</sup><br>(n=396) | DEC <sup>§</sup><br>(n=302) | <i>Salmonella</i> spp. <sup>§</sup><br>(n=255) | Norovirus <sup>§</sup><br>(n=1744) | Rotavirus <sup>§</sup> (n=714) |
|---------------------------------------------------------------|-------------------------|----------------------------------|------------------------------|------------------------------------------------|----------------------------------------------------|-----------------------------|------------------------------------------------|------------------------------------|--------------------------------|
| Male vs female                                                | 1.09 (1.00-1.19)        | 1.07 (0.94-1.22)                 | 1.1 (0.99-1.22)              | 1.04 (0.75-1.43)                               | 0.89 (0.72-1.09)                                   | <b>1.29 (1.02-1.64)</b>     | 1.11 (0.86-1.44)                               | <b>1.22 (1.08-1.36)</b>            | 0.88 (0.75-1.05)               |
| Age (years)                                                   |                         |                                  |                              |                                                |                                                    |                             |                                                |                                    |                                |
| 18-29                                                         | 1.10 (0.97-1.25)        | <b>1.32 (1.09-1.59)</b>          | 0.99 (0.85-1.14)             | 1.52 (0.93-2.44)                               | <b>1.92 (1.41-2.7)</b>                             | 1.11 (0.79-1.54)            | <b>0.64 (0.44-0.94)</b>                        | 1.03 (0.88-1.22)                   | <b>0.75 (0.58-0.97)</b>        |
| 30-44                                                         | <b>1.28 (1.14-1.45)</b> | <b>1.28 (1.06-1.56)</b>          | <b>1.28 (1.11-1.47)</b>      | 1.54 (0.94-2.50)                               | <b>2.04 (1.47-2.78)</b>                            | 1.02 (0.73-1.43)            | 0.83 (0.58-1.19)                               | <b>1.32 (1.12-1.56)</b>            | 1.08 (0.84-1.35)               |
| 45-59                                                         | <b>1.19 (1.06-1.35)</b> | 1.20 (1.00-1.47)                 | <b>1.16 (1.01-1.33)</b>      | <b>1.85 (1.18-2.94)</b>                        | <b>1.72 (1.25-2.38)</b>                            | 1.06 (0.77-1.47)            | 1.06 (0.76-1.47)                               | 1.09 (0.93-1.28)                   | <b>1.33 (1.08-1.67)</b>        |
| 60+ <sup>¶</sup>                                              | 1.00                    | 1.00                             | 1.00                         | 1.00                                           | 1.00                                               | 1.00                        | 1.00                                           | 1.00                               | 1.00                           |
| Suburb                                                        | <b>0.80 (0.72-0.88)</b> | <b>0.80 (0.68-0.92)</b>          | <b>0.80 (0.71-0.89)</b>      | 0.83 (0.58-1.19)                               | 0.96 (0.76-1.23)                                   | <b>0.75 (0.57-0.98)</b>     | 0.82 (0.62-1.09)                               | <b>0.85 (0.75-0.97)</b>            | <b>0.79 (0.66-0.95)</b>        |
| Had a medical history of enteric disease in the past 6 months | <b>0.41 (0.23-0.73)</b> | 0.42 (0.17-1.08)                 | <b>0.43 (0.22-0.85)</b>      | 0                                              | 0.24 (0.03-1.76)                                   | 0.34 (0.05-2.46)            | 0.71 (0.17-2.94)                               | 0.47 (0.21-1.01)                   | 0.32 (0.07-1.39)               |
| Had consumed suspicious food within 5 days before onset       | <b>1.18 (1.08-1.29)</b> | 1.06 (0.93-1.22)                 | <b>1.24 (1.12-1.38)</b>      | 1.26 (0.82-1.75)                               | 1.22 (0.99-1.51)                                   | 0.84 (0.66-1.08)            | 0.24 (0.96-1.61)                               | <b>1.31 (1.17-1.48)</b>            | 0.99 (0.83-1.18)               |
| Had kept or had contact with pets                             | <b>1.33 (1.17-1.5)</b>  | <b>1.57 (1.30-1.90)</b>          | <b>1.21 (1.04-1.40)</b>      | <b>1.62 (1.05-2.48)</b>                        | 1.17 (0.85-1.63)                                   | <b>1.79 (1.29-2.47)</b>     | 1.20 (0.83-1.75)                               | <b>1.26 (1.06-1.48)</b>            | 1.00 (0.78-1.27)               |

\* Data are adjusted odds ratio (95%CI) in binary logistic model or general logit model

§ Simplex infections

¶ Reference group in logistic regression model

Bold face:  $P < 0.05$



Adjusted odds ratios of age were shown in Table 2. Patients between 30-44 and 45-59 years were more vulnerable to infectious diarrhea and viral diarrhea. Those aged 30-44 years were the most vulnerable to *V. parahaemolyticus* (aOR versus 60+ years group: 2.04 [1.47-2.78]) and norovirus (aOR versus 60+ years group: 1.32 [1.12-1.56]). In addition, patients in 18-29 years group had a significantly lower odds of experiencing infectious diarrhea (aOR=0.85, 95% CI=0.76-0.97), viral infections (aOR=0.78, 95% CI=0.67-0.90), norovirus infections (aOR=0.78, 95% CI=0.66-0.92) and rotavirus infections (aOR=0.70, 95% CI=0.54-0.92) compared with 30-44 years group. Patients in 18-29 years group had a significantly lower odds of experiencing viral infections (aOR=0.85, 95% CI=0.74-0.98), *Salmonella* spp. infections (aOR=0.61, 95% CI=0.41-0.89) and rotavirus infections (aOR=0.56, 95% CI=0.44-0.72) compared with 45-59 years group. Patients in 30-44 years group had a significantly higher odds experiencing norovirus infections (aOR=1.22, 95% CI=1.03-1.43) compared with 40-45 years group.

Among diarrhea patients, 5376 (85.67%) visited the hospitals in suburb. Less positive patients lived in suburb area compared with negative patients ( $p<0.0001$ , Table 1). Comparing different enteric pathogen infections, the proportions of patients in suburb were significantly different ( $p<0.0001$ ). More diarrhea patients infected with *V. parahaemolyticus* (64.90%) lived in suburb area. Patients living in suburb area were less likely to get infected with enteric pathogens (aOR=0.75-0.85) except *V. parahaemolyticus* infections and *Salmonella* spp. infections (Table 2).

64 (0.73%) patients had a medical history of enteric disease in the past 6 months.

1  
2  
3 Within 5 days before onset, 3779 (42.96%) patients had a history of consuming  
4 suspicious food. 124 (1.41%) patients had a history of go out within 7 days before  
5 onset. And 1418 (16.12%) patients kept or had contact with pets. When compared  
6 with negative patients, a higher proportion of positive patients has a history of  
7 consuming suspicious food within 5 days before onset ( $p<0.0001$ ), had a history of  
8 going out within 7 days before onset ( $p=0.0010$ ), and kept or had contact with pets  
9 ( $p<0.0001$ ), while a lower proportion had a medical history of enteric disease in the  
10 past 6 months ( $p=0.0006$ ) (Table 1). Epidemiological history, including consuming  
11 suspicious food and keeping or contacting with pets, was significantly associated with  
12 higher odds of infectious diarrhea, viral infections and norovirus infections. A medical  
13 history of enteric disease was significantly associated with lower odds of infectious  
14 diarrhea (Table 2).

### 3. Clinical Symptoms

34  
35  
36 Of positive diarrhea patients, 13.11% reported fever, 41.91% reported nausea, 28.21%  
37 reported vomiting, and 49.09% reported abdominal pain (Table 3). Watery stool and  
38 loose stool were common, respectively accounting 76.27% and 20.93%. Compared  
39 with negative diarrhea patients, positive patients reported more fever ( $p=0.0009$ ),  
40 nausea ( $p<0.0001$ ), vomiting ( $p<0.0001$ ) and watery stool ( $p<0.0001$ ), while fewer  
41 abdominal pain ( $<0.0001$ ).

42  
43  
44 The distributions of clinical symptoms by different infections were significantly  
45 different (Table 3). Diarrhea patients infected with bacteria reported more fever  
46 (19.09%,  $p<0.0001$ ), abdominal pain (64.60%,  $p<0.0001$ ) and loose stool (23.28%,  
47  
48  
49

1  
2  
3  
4 p<0.0001). Diarrhea patients infected with virus reported more nausea (43.34%  
5  
6 p=0.0175), vomiting (30.13%, p=0.0001) and watery stool (78.35%, p<0.0001).  
7

8  
9 Diarrhea patients infected with *V. parahaemolyticus* featured more nausea (56.27%),  
10  
11 vomiting (41.41%), abdominal pain (71.9%) and watery stool (81.57%). Patients  
12  
13 infected with DEC featured fewer nausea (28.81%) and vomiting (13.58%). Patients  
14  
15 infected with *Salmonella* spp. featured more fever (28.24%). Patients infected with  
16  
17 norovirus featured fewer fever (9.69%) and abdominal pain (44.55%).  
18  
19  
20  
21  
22  
23  
24  
25  
26  
27  
28  
29  
30  
31  
32  
33  
34  
35  
36  
37  
38  
39  
40  
41  
42  
43  
44  
45  
46  
47  
48  
49  
50  
51  
52  
53  
54  
55  
56  
57  
58  
59  
60

Table 3 Clinical symptoms in diarrhea outpatients by different infections

|                       | Positive<br>(n=4219) | Negative<br>(n=4578) | <i>P</i>          | Bacterial<br>infections<br>(n=1147) | Viral<br>infections<br>(n=2914) | Bacterial-viral<br>Mixed<br>infections<br>(n=158) | <i>P</i>          | <i>V.<br/>parahaemol<br/>yticus</i> <sup>§</sup><br>(n=396) | DEC <sup>§</sup><br>(n=302) | <i>Salmonella</i><br>spp. <sup>§</sup><br>(n=255) | Norovirus <sup>§</sup><br>(n=1744) | Rotavirus <sup>§</sup><br>(n=714) | Other<br>infections <sup>§</sup><br>(n=808) | <i>P</i>          |
|-----------------------|----------------------|----------------------|-------------------|-------------------------------------|---------------------------------|---------------------------------------------------|-------------------|-------------------------------------------------------------|-----------------------------|---------------------------------------------------|------------------------------------|-----------------------------------|---------------------------------------------|-------------------|
| Fever, N (%)          | 553 (13.11)          | 495 (10.81)          | <b>0.0009</b>     | 219 (19.09)                         | 312 (10.71)                     | 22 (13.92)                                        | <b>&lt;0.0001</b> | 46 (11.62)                                                  | 43 (14.24)                  | 72 (28.24)                                        | 169 (9.69)                         | 96 (13.45)                        | 127 (15.72)                                 | <b>&lt;0.0001</b> |
| Nausea, N (%)         | 1768 (41.91)         | 1561 (34.10)         | <b>&lt;0.0001</b> | 442 (38.54)                         | 1263 (43.34)                    | 63 (39.87)                                        | <b>0.0175</b>     | 224 (56.27)                                                 | 87 (28.81)                  | 71 (27.84)                                        | 790 (45.30)                        | 309 (43.28)                       | 287 (35.52)                                 | <b>&lt;0.0001</b> |
| Vomiting, N (%)       | 1190 (28.21)         | 916 (20.01)          | <b>&lt;0.0001</b> | 269 (23.45)                         | 878 (30.13)                     | 43 (27.22)                                        | <b>0.0001</b>     | 164 (41.41)                                                 | 41 (13.58)                  | 37 (14.51)                                        | 595 (34.12)                        | 195 (27.31)                       | 158 (19.55)                                 | <b>&lt;0.0001</b> |
| Abdominal pain, N (%) | 2071 (49.09)         | 2446 (53.43)         | <b>&lt;0.0001</b> | 741 (64.60)                         | 1257 (43.14)                    | 73 (46.20)                                        | <b>&lt;0.0001</b> | 285 (71.97)                                                 | 170 (56.29)                 | 151 (59.22)                                       | 777 (44.55)                        | 321 (44.96)                       | 367 (45.42)                                 | <b>&lt;0.0001</b> |
| Fecal property, N (%) |                      |                      |                   |                                     |                                 |                                                   |                   |                                                             |                             |                                                   |                                    |                                   |                                             |                   |
| Watery                | 3218 (76.27)         | 3150 (68.81)         | <b>&lt;0.0001</b> | 814 (70.97)                         | 2283 (78.35)                    | 121 (76.58)                                       | <b>&lt;0.0001</b> | 323 (81.57)                                                 | 202 (66.89)                 | 179 (70.20)                                       | 1344 (77.06)                       | 583 (81.65)                       | 587 (72.65)                                 | <b>&lt;0.0001</b> |
| Loose                 | 883 (20.93)          | 1202 (26.26)         |                   | 267 (23.28)                         | 583 (20.01)                     | 33 (20.89)                                        |                   | 54 (13.64)                                                  | 85 (28.15)                  | 61 (23.92)                                        | 372 (21.33)                        | 121 (16.95)                       | 190 (23.51)                                 |                   |
| Mucous                | 72 (1.71)            | 143 (3.12)           |                   | 38 (3.31)                           | 31 (1.06)                       | 3 (1.90)                                          |                   | 8 (2.02)                                                    | 11 (3.64)                   | 11 (4.31)                                         | 18 (1.03)                          | 6 (0.84)                          | 18 (2.23)                                   |                   |
| Else                  | 46 (1.09)            | 83 (1.81)            |                   | 28 (2.44)                           | 17 (0.58)                       | 1 (0.63)                                          |                   | 11 (2.78)                                                   | 4 (1.32)                    | 4 (1.57)                                          | 10 (0.57)                          | 4 (0.56)                          | 13 (1.61)                                   |                   |

§ Simplex infections;

Bold face:  $P < 0.05$

#### 4. Pathogen Spectrum and Seasonality

In term of descriptive data, the enteric pathogens spectrum of infectious diarrhea patients displayed a yearly seasonal trend (Figure 1). In general, viruses were predominant during November to March of every seasonal cycle, accounting for more than 80% in every month. Bacteria were predominant during June to August of almost every seasonal cycle, accounting for more than 60% in every month. September and October were the transition period from bacteria to viruses, and April and May were the transition period from viruses to bacteria. Norovirus and rotavirus both showed yearly seasonal trends. Rotavirus peaked in winter months, especially in December and January. Norovirus displayed a less distinct and broader seasonality. Norovirus clustered around autumn and winter, while a smaller peak appeared in March of 2014 and 2015. In the seasonal cycle from 2015-2016, norovirus peaked in March 2016. *V. parahaemolyticus*, DEC and *Salmonella* spp. all showed yearly seasonal trends. These three enteric bacteria peaked in August, and *Salmonella* spp. showed a smaller peak (Figure 2).

Figure 1 insert here.

Figure 2 insert here.

In term of statistical analysis, there were significantly different season distribution in comparison of positive and negative diarrhea patients ( $p < 0.0001$ ), comparison of bacterial and viral and bacterial-viral infections ( $p < 0.0001$ ), and comparison of different enteric pathogens infections ( $p < 0.0001$ ). More bacterial infections appeared in summer (54.58%) and more viral infections appeared in winter (44.51%). The

1  
2  
3 proportion of winter was lower among norovirus infections (34.86%) compared with  
4  
5 among rotavirus infections (67.37%).  
6  
7

8 Patients in summer were 1.55-4.39 times more likely to have simplex bacterial  
9  
10 diarrhea and 0.16-0.20 times less likely to have simplex viral diarrhea compared with  
11  
12 in spring. Patients in autumn were 2.02-3.38 times more likely to have *V.*  
13  
14 *parahaemolyticus* infections and DEC infections, and 0.69-0.77 times less likely to  
15  
16 have simplex viral diarrhea compared with in spring. Patients in winter were  
17  
18 1.60-5.61 times more likely to have simplex viral infections, and 0.14-0.56 times less  
19  
20 likely to have simplex bacterial diarrhea compared with in spring (Table 4).  
21  
22  
23  
24  
25  
26  
27  
28  
29  
30  
31  
32  
33  
34  
35  
36  
37  
38  
39  
40  
41  
42  
43  
44  
45  
46  
47  
48  
49  
50  
51  
52  
53  
54  
55  
56  
57  
58  
59  
60

**Table 4 Seasonality of diarrhea outpatients by different infections\***

|                      | Negative<br>(n=4578) | Positive<br>(n=4219)    | Bacterial<br>infections<br>(n=1147) | Viral infections<br>(n=2914) | Bacterial-viral<br>Mixed<br>infections<br>(n=158) | <i>V. parahaemolyticus</i> <sup>§</sup><br>(n=396) | DEC <sup>§</sup><br>(n=302) | <i>Salmonella</i><br>spp. <sup>§</sup> (n=255) | Norovirus <sup>§</sup><br>(n=1744) | Rotavirus <sup>§</sup><br>(n=714) |
|----------------------|----------------------|-------------------------|-------------------------------------|------------------------------|---------------------------------------------------|----------------------------------------------------|-----------------------------|------------------------------------------------|------------------------------------|-----------------------------------|
| Season [ (No.(%) ]   |                      | <b>P&lt;0.0001</b>      | <b>P&lt;0.0001</b>                  |                              |                                                   | <b>P&lt;0.0001</b>                                 |                             |                                                |                                    |                                   |
| Spring               | 867 (18.94)          | 877 (20.79)             | 149 (12.99)                         | 695 (23.85)                  | 33 (20.89)                                        | 34 (8.59)                                          | 21 (6.95)                   | 41 (16.08)                                     | 462 (26.49)                        | 101 (14.15)                       |
| Summer               | 1746 (38.14)         | 927 (21.97)             | 626 (54.58)                         | 260 (8.92)                   | 41 (25.95)                                        | 252 (63.64)                                        | 178 (58.94)                 | 123 (48.24)                                    | 180 (10.32)                        | 32 (4.48)                         |
| Autumn               | 1238 (27.04)         | 1031 (24.44)            | 322 (28.07)                         | 662 (22.72)                  | 47 (29.75)                                        | 106 (26.77)                                        | 96 (31.79)                  | 72 (28.24)                                     | 494 (28.33)                        | 100 (14.01)                       |
| Winter               | 727 (15.88)          | 1384 (32.80)            | 50 (4.36)                           | 1297 (44.51)                 | 37 (23.42)                                        | 4 (1.01)                                           | 7 (2.32)                    | 19 (7.45)                                      | 608 (34.86)                        | 481 (67.37)                       |
| Season [aOR (95%CI)] |                      |                         |                                     |                              |                                                   |                                                    |                             |                                                |                                    |                                   |
| Spring <sup>¶</sup>  |                      | 1.00                    | 1.00                                | 1.00                         | 1.00                                              | 1.00                                               | 1.00                        | 1.00                                           | 1.00                               | 1.00                              |
| summer               |                      | <b>0.54 (0.48-0.61)</b> | <b>2.16 (1.77-2.64)</b>             | <b>0.18 (0.16-0.23)</b>      | 0.62 (0.39-1.00)                                  | <b>3.65 (2.53-5.29)</b>                            | <b>4.39 (2.77-6.96)</b>     | <b>1.55 (1.07-2.23)</b>                        | <b>0.20 (0.17-0.24)</b>            | <b>0.16 (0.10-0.24)</b>           |
| autumn               |                      | <b>0.85 (0.75-0.97)</b> | 1.59 (0.28-1.97)                    | <b>0.69 (0.60-0.79)</b>      | 1.04 (0.66-1.65)                                  | <b>2.2 (1.48-3.28)</b>                             | <b>3.38 (2.09-5.47)</b>     | 1.26 (0.85-1.87)                               | <b>0.77 (0.66-0.9)</b>             | <b>0.69 (0.52-0.93)</b>           |
| winter               |                      | <b>1.91 (1.67-2.18)</b> | <b>0.40 (0.29-0.56)</b>             | <b>2.26 (1.98-2.59)</b>      | 1.36 (0.84-2.20)                                  | <b>0.14 (0.05-0.40)</b>                            | <b>0.39 (0.16-0.92)</b>     | <b>0.56 (0.32-0.97)</b>                        | <b>1.60 (1.37-1.88)</b>            | <b>5.61 (4.42-7.11)</b>           |

\* Data are adjusted odds ratio (95%CI) in binary logistic model or general logit model

§ Simplex infections;

¶ Reference group in logistic regression model

Bold face: P<0.05

## DISCUSSION

This study is the first study in Shanghai identifying the etiology and epidemiology of adult infectious diarrhea in sporadic outpatients from a continuous active diarrhea surveillance enhanced with comprehensive laboratory testing for common enteric bacteria and virus. It also adds to the limited number of studies investigating adult cases of infectious diarrhea in China. The Shanghai Diarrhea Comprehensive Surveillance System used Probability Proportionate to Size (PPS) sampling method and was conducted among 22 sentinel hospitals in all 16 districts of Shanghai continuously since May 2012, data from which are more representative and more feasible to be extrapolated to the city's population by avoiding the influence of clusters and season-specific cases.

Etiology of adult infectious diarrhea in Shanghai was detailed in this study. At least one enteric pathogen was found in 47.96% adult diarrhea patients' stools. Viral infections are predominant and bacteria were isolated from many cases. These findings were consistent with those Wang's research in Beijing[2]. The comparison between our study with another research in Africa, which found bacterial more frequent than virus in diarrhea patients, showed that the etiology of infectious diarrhea has obvious divergence among regions depending on economic development and geography [4, 5].

We found that norovirus was the most common enteric pathogen, accounting for over 40% of all cases, followed by rotavirus, *V. parahaemolyticus*, DEC and *Salmonella* spp.. The proportion of norovirus was higher than the sum proportion of rotavirus, *V. parahaemolyticus*, DEC and *Salmonella* spp.. This result confirmed norovirus's leading role in adult infectious diarrhea in China, and was similar to the research finding in sporadic gastroenteritis in both developing and developed countries [21-24]. And it is observed that norovirus infections were more than twice as that of rotavirus in adult patients in Shanghai. Rotavirus ranked second to norovirus. This results was consistent with studies in Russia [24] and Shanghai, China[25], while inconsistent with study in France[26]. Yet according to WHO, rotavirus are most common etiological



1 agents of diarrhea in developing countries, which may due to rotavirus's important role in children. As  
2  
3 leading cause of severe diarrhea in children, the pathogenic role and disease burden of rotavirus in adults  
4  
5 had been underestimated. Rotavirus needs more attention in routine clinical diagnosis and vaccination  
6  
7 program.  
8  
9

10 According to this study, *V. parahaemolyticus*, DEC and *Salmonella* spp. were common bacteria in adult  
11  
12 infectious diarrhea. The prevalence of these three bacterial infections was similar between 2.90~4.50%,  
13  
14 much lower than viral infections. In previous studies, *V. parahaemolyticus*, DEC and *Salmonella* spp. were  
15  
16 also among the most prevalent pathogen in adult infectious diarrhea in different regions of China and  
17  
18 worldwide[1, 2, 17, 18, 27]. Although diarrhea due to *V. parahaemolyticus* decreased since 1998[28, 29], *V.*  
19  
20 *parahaemolyticus* was still the leading cause of adult bacterial infections in this study. However, *Shigella*  
21  
22 spp. was also among frequent bacteria in several studies before 2013[18, 28, 29]. This study showed that  
23  
24 positive rate of *Shigella* spp. infections was only 0.22% during 2012-2016 in Shanghai, which may due to  
25  
26 the downward trend of *Shigella* spp. infections over time [29].  
27  
28  
29  
30  
31

32 This study showed that there was association between adult infectious diarrhea and patient age. In general,  
33  
34 patients between 30-59 years were more likely to have infectious diarrhea and viral diarrhea than age groups  
35  
36 of 18-29 and 60+ years. This was partly consistent with a study in France which found incidence of acute  
37  
38 diarrhea in youth group was higher than elderly group [26]. Elderly people ( $\geq 60$ years) were the least likely  
39  
40 to get infected with *V. parahaemolyticus*, whereas people aged 30-44 years were the most likely among adult  
41  
42 age groups. The similar findings were observed in a study in Shanghai[29]. This may be related to more  
43  
44 seafood consumption in young adults, which is an important risk factor in *V. parahaemolyticus*  
45  
46 infections[30]. In contrast to other studies which found elderly people more vulnerable to norovirus[22, 31],  
47  
48 our study discovered that the highest proportion in norovirus infections was 30-44 years old. And  
49  
50 considering the results of general logit model adjusting for other factors, 30-44 years patients were the most  
51  
52  
53  
54  
55  
56  
57  
58  
59  
60

1 vulnerable to norovirus. Patients aged 18-29 years had the lowest odds experiencing rotavirus diarrhea.

2  
3 People living in rural area were more susceptible to DEC, norovirus and rotavirus, which may because city  
4  
5 environment provided more chance for pathogen to transmit.  
6

7  
8 In regarding to clinical symptoms in general, bacterial diarrhea was characterized by fever, abdominal pain  
9  
10 and loose stool, while viral diarrhea was characterized by nausea, vomiting and watery stool. However the  
11  
12 symptom of *V. parahaemolyticus* infections showed more like viral infections. In addition, abdominal pain  
13  
14 was common in *V. parahaemolyticus* infections. These findings of *V. parahaemolyticus* were in accordance  
15  
16 with a research in Shanghai during 1998-2013[28]. The symptoms of DEC and *Salmonella* spp. were similar  
17  
18 except fever. The proportion of fever was highest in *Salmonella* spp. (28.24%) while lowest in norovirus  
19  
20 (9.69%). The proportion of fever in norovirus infections was much lower in comparison with some  
21  
22 studies[26, 31], while the proportion in *Salmonella* spp. infections was close to another research [28]. The  
23  
24 proportion of abdominal pain was highest in *V. parahaemolyticus* (71.97%) while much lower in norovirus  
25  
26 (44.55%) and rotavirus (44.96%).  
27  
28  
29  
30  
31

32 This study also demonstrated the seasonality of adult infectious diarrhea and relevant contribution of  
33  
34 different enteric pathogens in seasonal trend. A seasonal distribution of adult infectious diarrhea was  
35  
36 observed with a large peak in winter and a small peak in summer. Winter peak was mainly due to norovirus  
37  
38 and rotavirus, which was in line with previous study[32, 33]. Summer peak was smaller, due to low  
39  
40 proportion of bacterial infections. What should be noted was that there was a peak around March due to  
41  
42 norovirus in 2014-2016, ever higher than the summer peak in 2015-2016 season cycle. This emerging spring  
43  
44 peak was possibly because of the increased activity of a novel norovirus GII.17 [34]. Rotavirus showed a  
45  
46 distinct peak in December and January (significantly winter VS summer aOR=35.67), which was consistent  
47  
48 with researches in Shanghai and Iran [25, 35], while different from a study in London (peak from January  
49  
50 through May) [36] and a study in Russia (peak from December through May) [24]. However, norovirus  
51  
52  
53  
54  
55  
56

1 displayed a broader seasonality peaking around autumn and winter (significantly winter VS summer  
2  
3 OR=8.00) in this study and a study in Netherland [9]. Bacterial infections, included *V. parahaemolyticus*,  
4  
5 DEC and *Salmonella* spp., showed a yearly seasonality peaking in summer (often in August), with  
6  
7 significantly summer VS winter OR 25.00, 11.11 and 2.78 respectively. This was similar in Enserink's study  
8  
9 [9], whereas autumn peak of bacterial infections was observed in some studies [25, 37]. The seasonality of  
10  
11 infectious diarrhea may due to the climate, biological characteristics of pathogens and people's diet habit of  
12  
13 Shanghai.

14  
15  
16  
17 There are several limitations that need to be acknowledged. First, information and detection results were  
18  
19 collected from 22 hospitals and 16 laboratories. Though detection methods & materials were unified and  
20  
21 regular trainings were hold, there was still a chance of bias caused by the different levels and conditions of  
22  
23 hospitals and laboratories. Admission rate bias should also be taken into consideration as patients may have  
24  
25 a preference when visiting hospitals of different levels or in different regions. Second, the recall bias of  
26  
27 epidemiological information was difficult to avoid. And the data of exposure history was important for  
28  
29 infectious diarrhea. Third, only mild diarrhea patients were included in surveillance, severe diarrhea patients  
30  
31 or asymptomatic patients were not studies in our research. Fourth, as for seasonality, only descriptive data of  
32  
33 every month or statistical tests of seasons were demonstrated. No statistical methods were used to analyze  
34  
35 the successive time series, which was because of the limit seasonal cycles of existing data. In the future,  
36  
37 after accumulating enough data during several years, time series analysis could be taken to explore the  
38  
39 inherent natural order and to forecasting prospective trend.

## 40 41 42 43 44 45 46 47 48 **CONCLUSIONS**

49  
50 In conclusion, this study provides a detailed picture about the epidemiology, etiology and seasonal pathogen  
51  
52 spectrum of adult infectious diarrhea in Shanghai. Viral infections are predominant, and norovirus is the  
53  
54 most common enteric pathogen detected in our surveillance. Other common pathogens include rotavirus, *V.*

1 *parahaemolyticus*, DEC and *Salmonella* spp.. Patients between 30-59 years were more vulnerable to  
2  
3 infectious diarrhea and viral diarrhea. A seasonal distribution was observed with larger peaks in winter and  
4  
5 smaller peaks in summer. Winter peak was mainly due to norovirus and rotavirus, and summer peak was due  
6  
7 to bacterial infections. An emerging spring peak of norovirus around March was observed in recent 3 years.  
8  
9  
10 Our findings highlight the necessity for conducting an active, comprehensive surveillance for both bacterial  
11  
12 and viral enteric pathogens in adults, to monitor the changing dynamics in the epidemiology and etiology of  
13  
14 infectious diarrhea. These findings promote to understand adult infectious diarrhea thoroughly and to  
15  
16 develop targeted prevention strategies.  
17  
18  
19  
20

## 21 LIST OF ABBREVIATIONS

22  
23 aOR: Adjusted odds ratio; *C. coli*: *Campylobacter coli*; *C. jejuni*: *Campylobacter jejuni*; DEC:  
24  
25 *Diarrheagenic Escherichia coli*; EAggEC: Enteroaggregative escherichia coli; EHEC: Enterohemorrhagic  
26  
27 escherichia coli; EIEC: Enteroinvasive escherichia coli; EPEC: Enteropathogenic escherichia coli; ETEC:  
28  
29 Enterotoxigenic escherichia coli; PPS: Probability Proportionate to Size; rRT-PCR: real-time Reverse  
30  
31 Transcription -Polymerase Chain Reaction; SAS: Statistical Analysis Software; *V. cholera*: *Vibrio cholera*; *V.*  
32  
33 *parahaemolyticus*: *Vibrio parahaemolyticus*; WHO: World Health Organization; *Y. enterocolitica*: *Yersinia*  
34  
35 *enterocolitica*;  
36  
37  
38  
39  
40  
41

## 42 COMPETING INTERESTS

43  
44 The authors declare that they have no competing interests.  
45  
46  
47

## 48 AUTHORS' CONTRIBUTIONS

49  
50 Xiao-huan Gong performed the statistical analysis and drafted the manuscript. Hao Pan and Huan-yu Wu  
51  
52 placed the surveillance system into effect. Jian Li designed the study of the surveillance system. Wen-jia  
53  
54 Xiao participated in the management of the system. Xi Zhang, Min Chen and Zheng Teng carried out the  
55  
56  
57

1 management and quality control of the laboratory tests. Zheng-an Yuan conceived of the study. All authors  
2  
3 read and approved of the final manuscript.  
4  
5

## 6 **ACKNOWLEDGMENTS**

7  
8  
9 The authors of this study thank all of the public health workers in the CDCs and health-care workers in the  
10  
11 hospitals involved in the surveillance system for keeping the system running and for their acquisition of data.  
12  
13 We are grateful to Fan Wu and Yi He for their intellectual contributions to the study's design. We are  
14  
15 grateful to Martin C. W. Chan and She-Lan Liu for their valuable revision advice on the manuscript.  
16  
17  
18

## 19 **FUNDING**

20  
21  
22 This work was supported by the 4th Round of Three Years Action Plan on Public of Health of Shanghai:  
23  
24 Key Discipline-Epidemiology and Hygiene Microbiology (No. 15GWZK0101), Shanghai Public Health  
25  
26 Professional Overseas Training Grant (No. GWTD2015S02), from the Shanghai Municipal Commission of  
27  
28 Health & Family Planning.  
29  
30  
31

## 32 **REFERENCES**

- 33  
34  
35  
36  
37  
38  
39  
40  
41  
42  
43  
44  
45  
46  
47  
48  
49  
50  
51  
52  
53  
54  
55  
56  
57  
58  
59  
60
1. The World Health Organization, *Diarrhoeal disease*. 2013.
  2. Wang, X., et al., *Etiology of Childhood Infectious Diarrhea in a Developed Region of China: Compared to Childhood Diarrhea in a Developing Region and Adult Diarrhea in a Developed Region*. PLoS One, 2015. **10**(11): p. e0142136.
  3. Chan, S.S., et al., *Acute bacterial gastroenteritis: a study of adult patients with positive stool cultures treated in the emergency department*. Emerg Med J, 2003. **20**(4): p. 335-8.
  4. Thapar, N. and I.R. Sanderson, *Diarrhoea in children: an interface between developing and developed countries*. Lancet, 2004. **363**(9409): p. 641-53.
  5. Podewils, L.J., et al., *Acute, infectious diarrhea among children in develop-ing countries*. Seminars in Pediatric Infectious Diseases, 2004. **15**(3): p. 155-168.
  6. GBD 2015 Mortality and Causes of Death Collaborators, *Global, regional, and national life expectancy, all-cause mortality, and cause-specific mortality for 249 causes of death, 1980 - 2015: a systematic analysis for the Global Burden of Disease Study 2015*. Lancet, 2016. **388**(10053): p. 1459-544
  7. JONES, T.F., et al., *A population-based estimate of the substantial burden of diarrhoeal disease in the United States; FoodNet, 1996 - 2003*. 2007. p. 293-301
  8. Benhafid, M., et al., *Epidemiology of Rotavirus Gastroenteritis among Children <5 Years of Age in Morocco during 1 Year*

- of Sentinel Hospital Surveillance, June 2006 – May 2007. The Journal of Infectious Diseases, 2009. **200**(s1): p. S70-S75.
9. Enserink, R., et al., *Gastroenteritis Attributable to 16 Enteropathogens in Children Attending Day Care*. 2015. p. 5-10.
  10. Chhabra, P., et al., *Etiology of Viral Gastroenteritis in Children <5 Years of Age in the United States, 2008-2009*. The Journal of Infectious Diseases, 2013. **208**(5): p. 790-800.
  11. Grant, L., et al., *Epidemiologic and clinical features of other enteric viruses associated with acute gastroenteritis in American Indian infants*. J Pediatr, 2012. **161**(1): p. 110-5.e1.
  12. Fletcher, S., et al., *Gastrointestinal pathogen distribution in symptomatic children in Sydney, Australia*. J Epidemiol Glob Health, 2013. **3**(1): p. 11-21.
  13. Sambe-Ba, B., et al., *Community-acquired diarrhea among children and adults in urban settings in Senegal: clinical, epidemiological and microbiological aspects*. BMC Infectious Diseases, 2013. **13**: p. 580.
  14. Franck, K.T., et al., *Norovirus epidemiology in community and health care settings and association with patient age, Denmark*. 2014. p. 1123-31.
  15. Parry, C.M., et al., *A retrospective study of secondary bacteraemia in hospitalised adults with community acquired non-typhoidal Salmonella gastroenteritis*. BMC Infectious Diseases, 2013. **13**: p. 107.
  16. Lozano, R., et al., *Global and regional mortality from 235 causes of death for 20 age groups in 1990 and 2010: a systematic analysis for the Global Burden of Disease Study 2010*. Lancet, 2012. **380**(9859): p. 2096-2128.
  17. Dong, B., et al., *Bacterial Etiologies of Five Core Syndromes: Laboratory-Based Syndromic Surveillance Conducted in Guangxi, China*. PLoS One, 2014. **9**(10): p. e110876.
  18. Qu, M., et al., *Etiology of acute diarrhea due to enteropathogenic bacteria in Beijing, China*. Journal of Infection, 2012. **65**(3): p. 214-222.
  19. WHO, *Diarrhoea*. <http://www.who.int/topics/diarrhoea/en/>. 2016.
  20. Mathers, C.D., et al., *Global Burden of Disease 2000: Version 2 methods and results*. 2002, WHO.
  21. Tam, C.C., et al., *Longitudinal study of infectious intestinal disease in the UK (IID2 study): incidence in the community and presenting to general practice*. Gut, 2012. **61**(1): p. 69-77.
  22. Patel, M.M., et al., *Systematic literature review of role of noroviruses in sporadic gastroenteritis*. Emerg Infect Dis, 2008. **14**(8): p. 1224-31.
  23. Morillo, S.G. and M.C. Timenetsky, *Norovirus: an overview*. Rev Assoc Med Bras (1992), 2011. **57**(4): p. 453-8.
  24. Podkolzin, A.T., et al., *Hospital - Based Surveillance of Rotavirus and Other Viral Agents of Diarrhea in Children and Adults in Russia, 2005 – 2007*. The Journal of Infectious Diseases, 2009. **200**(s1): p. S228-S233.
  25. Wang, Y., J. Zhang and P. Liu, *Clinical and molecular epidemiologic trends reveal the important role of rotavirus in adult infectious gastroenteritis, in Shanghai, China*. Infect Genet Evol, 2016.
  26. Arena, C., et al., *Acute diarrhea in adults consulting a general practitioner in France during winter: incidence, clinical characteristics, management and risk factors*. BMC Infectious Diseases, 2014. **574** (14): p. 1-7.
  27. Liu, H.X. and J. Zhang, *[Analysis of reported infectious diarrhea (other than cholera, dysentery, typhoid and paratyphoid) in China in 2011]*. Zhonghua Yu Fang Yi Xue Za Zhi, 2013. **47**(4): p. 328-32.
  28. Qi, X.L., et al., *Incidence rates and clinical Symptoms of Salmonella, Vibrio parahaemolyticus, and Shigella infections in China, 1998-2013*. J Infect Dev Ctries, 2016. **10**(2): p. 127-33.
  29. Zhang, Y., et al., *Analysis of bacterial pathogens causing acute diarrhea on the basis of sentinel surveillance in Shanghai, China, 2006-2011*. Jpn J Infect Dis, 2014. **67**(4): p. 264-8.
  30. Su, Y. and C. Liu, *Vibrio parahaemolyticus: A concern of seafood safety*. Food Microbiology, 2007. **24**(6): p. 549-558.
  31. Tang, M.B., et al., *Epidemiological and molecular analysis of human norovirus infections in Taiwan during 2011 and 2012*. BMC Infectious Diseases, 2013. **13**: p. 338.
  32. Karsten, C., et al., *Incidence and risk factors for community-acquired acute gastroenteritis in north-west Germany in 2004*. 2009. **28**(8): p. 935 - 43.
  33. de Wit, M.A., et al., *Gastroenteritis in sentinel general practices, The Netherlands*. 2001. **7**(1): p. 82 - 91.
  34. Gao, Z., et al., *Increased norovirus activity was associated with a novel norovirus GII.17 variant in Beijing, China during*

winter 2014 - 2015. BMC Infectious Diseases, 2015. **15**(1).

35. Eesteghamati, A., et al., *Sentinel Hospital - Based Surveillance of Rotavirus Diarrhea in Iran*. The Journal of Infectious Diseases, 2009. **200**(s1): p. S244-S247.
36. Iturriza Gómara, M., et al., *Rotavirus Surveillance in Europe, 2005 - 2008: Web - Enabled Reporting and Real - Time Analysis of Genotyping and Epidemiological Data*. The Journal of Infectious Diseases, 2009. **200**(s1): p. S215-S221.
37. Liang, Z., et al., *Serotypes, seasonal trends, and antibiotic resistance of non-typhoidal Salmonella from human patients in Guangdong Province, China, 2009 - 2012*. BMC Infectious Diseases, 2015. **15**(1): p. 53.

For peer review only

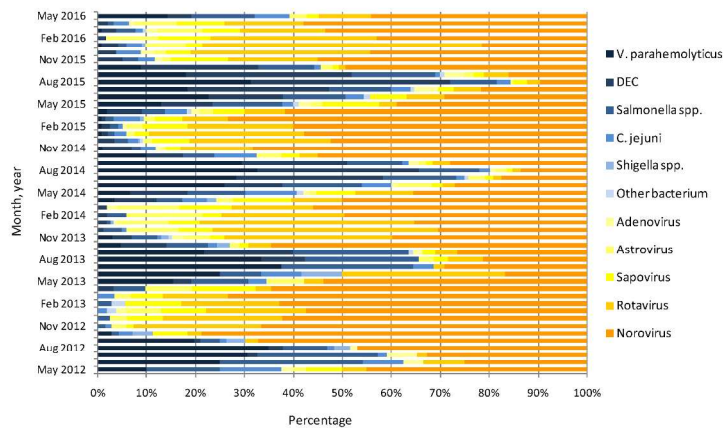

Figure 1 Pathogen spectrum of major enteric pathogens in adults with infectious diarrhea by month in Shanghai, May 2012-May 2016

Figure 1 Pathogen spectrum of major enteric pathogens in adults with infectious diarrhea by month in Shanghai, May 2012-May 2016

297x210mm (300 x 300 DPI)



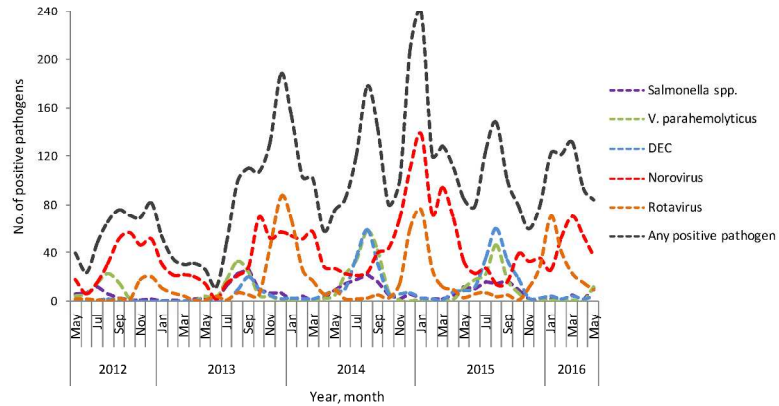

Figure2 Seasonality of major enteric pathogens in adult with infectious diarrhea in Shanghai, May 2012-May 2016

Figure2 Seasonality of major enteric pathogens in adult with infectious diarrhea in Shanghai, May 2012-May 2016

297x210mm (300 x 300 DPI)

**STROBE 2007 (v4) Statement—Checklist of items that should be included in reports of *cross-sectional studies***

| Section/Topic                | Item # | Recommendation                                                                                                                                                                       | Reported on page # |
|------------------------------|--------|--------------------------------------------------------------------------------------------------------------------------------------------------------------------------------------|--------------------|
| <b>Title and abstract</b>    | 1      | (a) Indicate the study's design with a commonly used term in the title or the abstract                                                                                               | 3                  |
|                              |        | (b) Provide in the abstract an informative and balanced summary of what was done and what was found                                                                                  | 3                  |
| <b>Introduction</b>          |        |                                                                                                                                                                                      |                    |
| Background/rationale         | 2      | Explain the scientific background and rationale for the investigation being reported                                                                                                 | 6                  |
| Objectives                   | 3      | State specific objectives, including any prespecified hypotheses                                                                                                                     | 7                  |
| <b>Methods</b>               |        |                                                                                                                                                                                      |                    |
| Study design                 | 4      | Present key elements of study design early in the paper                                                                                                                              | 7-8                |
| Setting                      | 5      | Describe the setting, locations, and relevant dates, including periods of recruitment, exposure, follow-up, and data collection                                                      | 7-8                |
| Participants                 | 6      | (a) Give the eligibility criteria, and the sources and methods of selection of participants                                                                                          | 7-8                |
| Variables                    | 7      | Clearly define all outcomes, exposures, predictors, potential confounders, and effect modifiers. Give diagnostic criteria, if applicable                                             | 8-9                |
| Data sources/<br>measurement | 8*     | For each variable of interest, give sources of data and details of methods of assessment (measurement). Describe comparability of assessment methods if there is more than one group | 7-10               |
| Bias                         | 9      | Describe any efforts to address potential sources of bias                                                                                                                            | 7-10               |
| Study size                   | 10     | Explain how the study size was arrived at                                                                                                                                            | 7-8                |
| Quantitative variables       | 11     | Explain how quantitative variables were handled in the analyses. If applicable, describe which groupings were chosen and why                                                         | 10                 |
| Statistical methods          | 12     | (a) Describe all statistical methods, including those used to control for confounding                                                                                                | 10                 |
|                              |        | (b) Describe any methods used to examine subgroups and interactions                                                                                                                  | 10                 |
|                              |        | (c) Explain how missing data were addressed                                                                                                                                          |                    |
|                              |        | (d) If applicable, describe analytical methods taking account of sampling strategy                                                                                                   | 7-8/10             |
|                              |        | (e) Describe any sensitivity analyses                                                                                                                                                |                    |
| <b>Results</b>               |        |                                                                                                                                                                                      |                    |

|                          |     |                                                                                                                                                                                                              |       |
|--------------------------|-----|--------------------------------------------------------------------------------------------------------------------------------------------------------------------------------------------------------------|-------|
| Participants             | 13* | (a) Report numbers of individuals at each stage of study—eg numbers potentially eligible, examined for eligibility, confirmed eligible, included in the study, completing follow-up, and analysed            | 10-11 |
|                          |     | (b) Give reasons for non-participation at each stage                                                                                                                                                         | 11    |
|                          |     | (c) Consider use of a flow diagram                                                                                                                                                                           |       |
| Descriptive data         | 14* | (a) Give characteristics of study participants (eg demographic, clinical, social) and information on exposures and potential confounders                                                                     | 11    |
|                          |     | (b) Indicate number of participants with missing data for each variable of interest                                                                                                                          |       |
| Outcome data             | 15* | Report numbers of outcome events or summary measures                                                                                                                                                         | 10-11 |
| Main results             | 16  | (a) Give unadjusted estimates and, if applicable, confounder-adjusted estimates and their precision (eg, 95% confidence interval). Make clear which confounders were adjusted for and why they were included | 12-21 |
|                          |     | (b) Report category boundaries when continuous variables were categorized                                                                                                                                    | 10    |
|                          |     | (c) If relevant, consider translating estimates of relative risk into absolute risk for a meaningful time period                                                                                             |       |
| Other analyses           | 17  | Report other analyses done—eg analyses of subgroups and interactions, and sensitivity analyses                                                                                                               |       |
| <b>Discussion</b>        |     |                                                                                                                                                                                                              |       |
| Key results              | 18  | Summarise key results with reference to study objectives                                                                                                                                                     | 22-26 |
| Limitations              | 19  | Discuss limitations of the study, taking into account sources of potential bias or imprecision. Discuss both direction and magnitude of any potential bias                                                   | 25    |
| Interpretation           | 20  | Give a cautious overall interpretation of results considering objectives, limitations, multiplicity of analyses, results from similar studies, and other relevant evidence                                   | 22-26 |
| Generalisability         | 21  | Discuss the generalisability (external validity) of the study results                                                                                                                                        | 22-26 |
| <b>Other information</b> |     |                                                                                                                                                                                                              |       |
| Funding                  | 22  | Give the source of funding and the role of the funders for the present study and, if applicable, for the original study on which the present article is based                                                | 27    |

\*Give information separately for cases and controls in case-control studies and, if applicable, for exposed and unexposed groups in cohort and cross-sectional studies.

**Note:** An Explanation and Elaboration article discusses each checklist item and gives methodological background and published examples of transparent reporting. The STROBE checklist is best used in conjunction with this article (freely available on the Web sites of PLoS Medicine at <http://www.plosmedicine.org/>, Annals of Internal Medicine at <http://www.annals.org/>, and Epidemiology at <http://www.epidem.com/>). Information on the STROBE Initiative is available at [www.strobe-statement.org](http://www.strobe-statement.org).

# BMJ Open

## Epidemiology, etiology and seasonality of infectious diarrhea in adult outpatients through active surveillance in Shanghai, China, 2012-2016: a cross-sectional study

|                                 |                                                                                                                                                                                                                                                                                                                                                                                                                                                                                                                                                                                                                                                                                                                                                                                                                                                                                                                                                                                                                                                                                |
|---------------------------------|--------------------------------------------------------------------------------------------------------------------------------------------------------------------------------------------------------------------------------------------------------------------------------------------------------------------------------------------------------------------------------------------------------------------------------------------------------------------------------------------------------------------------------------------------------------------------------------------------------------------------------------------------------------------------------------------------------------------------------------------------------------------------------------------------------------------------------------------------------------------------------------------------------------------------------------------------------------------------------------------------------------------------------------------------------------------------------|
| Journal:                        | <i>BMJ Open</i>                                                                                                                                                                                                                                                                                                                                                                                                                                                                                                                                                                                                                                                                                                                                                                                                                                                                                                                                                                                                                                                                |
| Manuscript ID                   | bmjopen-2017-019699.R1                                                                                                                                                                                                                                                                                                                                                                                                                                                                                                                                                                                                                                                                                                                                                                                                                                                                                                                                                                                                                                                         |
| Article Type:                   | Research                                                                                                                                                                                                                                                                                                                                                                                                                                                                                                                                                                                                                                                                                                                                                                                                                                                                                                                                                                                                                                                                       |
| Date Submitted by the Author:   | 18-Apr-2018                                                                                                                                                                                                                                                                                                                                                                                                                                                                                                                                                                                                                                                                                                                                                                                                                                                                                                                                                                                                                                                                    |
| Complete List of Authors:       | Gong, Xiaohuan; Shanghai Municipal Center for Disease Control and Prevention, Division of Infectious Disease Control and Prevention<br>Wu, Huan-yu; Shanghai Municipal Center for Disease Control and Prevention, Division of Infectious Disease Control and Prevention<br>Li, Jian; Shanghai Municipal Center for Disease Control and Prevention, Division of Infectious Disease Control and Prevention<br>Xiao, Wen-jia; Shanghai Municipal Center for Disease Control and Prevention, Division of Infectious Disease Control and Prevention<br>Zhang, Xi; Shanghai Municipal Center for Disease Control and Prevention, Microbiology Laboratory<br>Chen, Min; Shanghai Municipal Center for Disease Control and Prevention, Microbiology Laboratory<br>Teng, Zheng; Shanghai Municipal Center for Disease Control and Prevention, Microbiology Laboratory<br>Pan, Hao; Shanghai Municipal Center for Disease Control and Prevention, Division of Infectious Disease Control and Prevention<br>Yuan, Zheng-an ; Shanghai Municipal Center for Disease Control and Prevention |
| <b>Primary Subject Heading</b>: | Public health                                                                                                                                                                                                                                                                                                                                                                                                                                                                                                                                                                                                                                                                                                                                                                                                                                                                                                                                                                                                                                                                  |
| Secondary Subject Heading:      | Epidemiology                                                                                                                                                                                                                                                                                                                                                                                                                                                                                                                                                                                                                                                                                                                                                                                                                                                                                                                                                                                                                                                                   |
| Keywords:                       | INFECTIOUS DISEASES, BACTERIOLOGY, VIROLOGY                                                                                                                                                                                                                                                                                                                                                                                                                                                                                                                                                                                                                                                                                                                                                                                                                                                                                                                                                                                                                                    |
|                                 |                                                                                                                                                                                                                                                                                                                                                                                                                                                                                                                                                                                                                                                                                                                                                                                                                                                                                                                                                                                                                                                                                |

SCHOLARONE™  
Manuscripts

1  
2  
3  
4 **Epidemiology, etiology and seasonality of infectious**  
5 **diarrhea in adult outpatients through active**  
6 **surveillance in Shanghai, China, 2012-2016: a**  
7 **cross-sectional study**  
8  
9  
10  
11  
12  
13  
14  
15  
16

17 Xiao-huan Gong<sup>†</sup>, Huan-yu Wu<sup>†</sup>, Jian Li, Wen-jia Xiao, Xi Zhang, Min Chen, Zheng  
18 Teng, Hao Pan<sup>\*</sup>, Zheng-an Yuan<sup>\*</sup>  
19  
20  
21  
22

23 <sup>†</sup> Equal contributor: Xiao-huan Gong, Huan-yu Wu  
24  
25

26 <sup>\*</sup> Corresponding author:  
27

28 Zheng-an Yuan  
29

30 Email: yuanzhengan@scdc.sh.cn; Phone:+86 21 62758710  
31  
32

33 Hao Pan  
34

35 Email: panhao@scdc.sh.cn; Phone:+86 21 62758710  
36  
37  
38  
39

40 Division of Infectious Disease Control and Prevention, Shanghai Municipal Center  
41 for Disease Control and Prevention, No. 1380, West Zhongshan Road, Shanghai  
42 200336, China.  
43  
44  
45  
46

47 **Key Words:**  
48

49 Diarrhea, Surveillance, Epidemiology, Etiology, Sporadic, Bacteria, Virus, China  
50  
51  
52

53 **Words Count:** 3884  
54  
55  
56  
57

## Email addresses:

Xiao-huan Gong: [gloriag1988@163.com](mailto:gloriag1988@163.com)

Huan-yu Wu: [wuhuanyu@scdc.sh.cn](mailto:wuhuanyu@scdc.sh.cn)

Jian Li: [lijian@scdc.sh.cn](mailto:lijian@scdc.sh.cn)

Wen-jia Xiao: [xiaowenjia@scdc.sh.cn](mailto:xiaowenjia@scdc.sh.cn)

Xi Zhang: [zhangxi@scdc.sh.cn](mailto:zhangxi@scdc.sh.cn)

Min Chen: [chenmin@scdc.sh.cn](mailto:chenmin@scdc.sh.cn)

Zheng Teng: [tengzheng@scdc.sh.cn](mailto:tengzheng@scdc.sh.cn)

Hao Pan: [panhao@scdc.sh.cn](mailto:panhao@scdc.sh.cn)

Zheng-an Yuan: [yuanzhengan@scdc.sh.cn](mailto:yuanzhengan@scdc.sh.cn)

## ABSTRACT

### Objectives

This study aimed to identify the epidemiology, clinical characteristics, etiology and seasonality of sporadic infectious diarrhea in adults in Shanghai.

### Setting

This study was based on a citywide, active continuous hospital-based diarrhea surveillance network established by Shanghai CDC. There were 22 sentinel hospitals in all 16 districts (9 primary-level hospitals, 6 secondary-level hospitals and 7 tertiary-level hospitals), which were selected using Probability Proportionate to Size (PPS) sampling method.

### Participants

From 1 May 2012 through 31 May 2016, 90713 patients were included in this study. Among 8797 patients whose stool samples were collected and detected, 4392 patients were male.

### Results

The positive rate was 47.96%. Bacterial and viral infections accounted for 27.19% and 69.07% separately. Norovirus was the most common pathogen (43.10%), followed by rotavirus, *V. parahaemolyticus*, *Diarrheagenic Escherichia coli* (DEC) and *Salmonella* spp.. Patients between 30-44 and 45-59 years were more likely to infectious diarrhea and viral diarrhea. Those aged 30-44 years were the most likely to

1  
2  
3  
4 *V. parahaemolyticus* (aOR versus 60+ years: 2.04 [1.47-2.78]) and norovirus (aOR  
5  
6 versus 60+ years: 1.32 [1.12-1.56]). Bacterial (except *V. parahaemolyticus*) diarrhea  
7  
8 was characterized by fever, abdominal pain and loose stool; whilst viral diarrhea was  
9  
10 characterized by nausea, vomiting and watery stool. A seasonal distribution of  
11  
12 infectious diarrhea was observed with larger peaks in winter and smaller peaks in  
13  
14 summer. Winter peaks were mainly due to norovirus and rotavirus, and summer peaks  
15  
16 were due to bacterial infections. An emerging spring peak of norovirus around March  
17  
18 was observed in the past 3 years.  
19  
20  
21  
22  
23

## 24 **Conclusion**

25  
26 Viral infections were predominant, and norovirus played a leading role. A seasonal  
27  
28 distribution was observed and an emerging spring peak of norovirus was noted. Our  
29  
30 findings highlight the necessity for conducting an active, comprehensive surveillance  
31  
32 in adults, to monitor changing dynamics in the epidemiology and etiology of  
33  
34 infectious diarrhea.  
35  
36  
37  
38  
39

## 40 **Key Words**

41  
42 Diarrhea, Surveillance, Epidemiology, Etiology, Sporadic, Bacteria, Virus, China  
43  
44  
45

## 46 **Strengths and limitations of this study**

47  
48  
49 ✧ This is the first study in Shanghai identifying the etiology and epidemiology of  
50  
51 adult infectious diarrhea in sporadic outpatients from a continuous active diarrhea  
52  
53  
54  
55  
56  
57



1  
2  
3 surveillance enhanced with comprehensive laboratory testing for common enteric  
4  
5  
6 bacteria and virus.  
7

- 8  
9 ✧ Etiology of adult infectious diarrhea in Shanghai, including bacteria and virus,  
10  
11 was detailed in this study.  
12  
13  
14  
15 ✧ Seasonality of adult infectious diarrhea and relevant contribution of different  
16  
17 enteric pathogens in seasonal trend were demonstrated in detail.  
18  
19  
20 ✧ Since information and detection results were collected from 22 hospitals and 16  
21  
22 laboratories, there was a chance of bias caused by the different levels and  
23  
24 conditions of hospitals and laboratories. Also admission rate bias and recall bias  
25  
26 was difficult to avoid.  
27  
28  
29 ✧ As for seasonality, only descriptive data of every month or statistical tests of  
30  
31 seasons were demonstrated. No statistical methods were used to analyze the  
32  
33 successive time series.  
34  
35  
36  
37  
38  
39  
40

## 41 **BACKGROUND**

42  
43 Diarrhea is generally characterized by the frequent passage of loose or liquid stools. It  
44  
45 is usually a symptom of gastrointestinal infections caused by bacterial, viral or  
46  
47 parasitic pathogens, which spread through contaminated food or drinking-water or  
48  
49 from person-to-person[1]. According to WHO, rotavirus and *Diarrheogenic*  
50  
51 *Escherichia coli* (DEC) are the two most common etiological agents of diarrhea in  
52  
53 developing countries[1]. However, norovirus was found the most prevalent pathogen  
54  
55  
56  
57

1  
2  
3 of infectious diarrhea in adults in China CDC's research[2], and *Vibrio*  
4  
5  
6 *parahaemolyticus* (*V. parahaemolyticus*) was the most common enteric pathogen in  
7  
8 acute bacterial gastroenteritis[3]. The etiology of infectious diarrhea differs among  
9  
10 regions depending on economic development, local climate and geography [4, 5].  
11

12  
13 Nearly 1.7 billion cases and 1.3 million deaths due to diarrhea occur worldwide every  
14  
15 year.[1, 6] Diarrhea causes substantial medical and healthcare costs and thus has a  
16  
17 high economic impact on society[7]. Diarrhea remains one of the major causes of  
18  
19 disease burden worldwide, despite significant progress in sanitation status and public  
20  
21 health awareness. Mortality due to diarrhea fell 20% in recent 10 years, while it is still  
22  
23 leading common cause of life loss (ranking fifth) globally[6]. To react to this  
24  
25 worldwide health issue, we established the Shanghai Diarrhea Comprehensive  
26  
27 Surveillance System since 2012, which is an active continuous surveillance system  
28  
29 and which this research is based on.  
30  
31  
32  
33

34  
35 Most of current studies of diarrhea have focused on children under 5 years old[8-12].  
36  
37 Consequently, limited data about the epidemiology and etiology of infectious diarrhea  
38  
39 in adults is available[13-15]. Although diarrhea accounts for only 2% deaths of  
40  
41 adults[16], they may play a role in enteric infection transmission to other susceptible  
42  
43 populations such as immunocompromised patients. Furthermore, there is rare research  
44  
45 on the etiology of infectious diarrhea in adults in China[2, 3, 17, 18], especially based  
46  
47 on a continuous active surveillance with comprehensive laboratory detection of  
48  
49 enteric bacteria and viruses. Better understanding to the epidemiology, etiology and  
50  
51 seasonality of infectious diarrhea in adults would be valuable for planning and  
52  
53  
54  
55  
56  
57

1  
2  
3  
4 adopting targeted preventive measures and antimicrobial therapy.

5  
6 The objective of this study was to identify the epidemiology, clinical characteristics,  
7  
8 etiology and pathogen seasonality of infectious diarrhea in adult sporadic outpatients  
9  
10 through an active continuous hospital-based diarrhea surveillance in Shanghai, and to  
11  
12 explore to develop targeted policy of disease prevention and control in the future.  
13  
14  
15

## 16 **METHODS**

### 17 **Shanghai Diarrhea Comprehensive Surveillance System**

18  
19  
20 The Shanghai Diarrhea Comprehensive Surveillance System conducts active,  
21  
22 population-based surveillance on diarrhea outpatients. It consists of adult surveillance  
23  
24 and children surveillance. The adult surveillance was established with 6 sentinel  
25  
26 hospitals in May 2012, and incorporated 16 additional sentinel hospitals in August  
27  
28 2013. Municipal CDC, district CDCs and sentinel hospitals cooperate to maintain the  
29  
30 surveillance, and share information and detection results through a dedicated online  
31  
32 system. The 22 sentinel hospitals (9 primary-level hospitals, 6 secondary-level  
33  
34 hospitals and 7 tertiary-level hospitals) were selected using Probability Proportionate  
35  
36 to Size (PPS) sampling method among all hospitals which had enteric disease clinics  
37  
38 in all 16 districts of Shanghai. Different sampling intervals were allocated to different  
39  
40 sentinel hospitals considering the hospitals' location(district distribution),  
41  
42 classification(hospital level distribution) and annual number of diarrhea patients  
43  
44 (workload and operability)comprehensively, for use of collecting fecal specimens,  
45  
46 ranging from 3:1 to 20:1.  
47  
48  
49  
50  
51  
52  
53  
54  
55  
56

1  
2  
3  
4 Surveillance subjects were defined as patients who visited the enteric disease clinics  
5  
6 of sentinel hospitals, with 3 or more loose or liquid stools per day, or more frequently  
7  
8 than normal for the individual (World Health Organization's definition of  
9  
10 diarrhea)[19]. Demographic, epidemiological and medical information of all  
11  
12 surveillance subjects was obtained using a standardized questionnaire, and recorded  
13  
14 into the dedicated online system. Epidemiologically-linked outbreak cases were  
15  
16 excluded via inquiry.  
17  
18  
19  
20

### 21 **Patient and Public Involvement**

22  
23  
24 Patients involved were informed about the development and procedure of the  
25  
26 surveillance, and interviewed by doctors in sentinel hospitals.  
27  
28  
29

### 30 **Laboratory Tests**

31  
32  
33 Fecal specimens were collected from surveillance subjects in accordance with  
34  
35 sampling intervals by trained medical staff, as a part of standard medical care. If the  
36  
37 sampling interval of a sentinel hospital is X, then fecal specimens are collected from  
38  
39 the Xth, 2Xth, 3Xth,...nXth surveillance subjects in this sentinel hospital.  
40  
41  
42 Approximately 8~10g (mL) of stool was collected and then dispensed into two  
43  
44 containers: (1) a tube with Cary-Blair (C-B) culture medium for bacteria testing and  
45  
46 (2) a sterile plastic cup for virus testing. Nucleic Acid was extracted from fecal  
47  
48 specimens (20% w/v or v/v suspensions in PBS) using the QIAamp Viral RNA Mini  
49  
50 Kit (Qiagen, Hilden, Germany).  
51  
52  
53  
54

55 All specimens were detected for 8 bacterial pathogens [*Vibrio cholera* (*V. cholera*),  
56  
57

1  
2  
3  
4 *Shigella* spp., *Salmonella* spp., *V. parahaemolyticus*, *Campylobacter jejuni* (*C. jejuni*),  
5  
6 *Yersinia enterocolitica* (*Y. enterocolitica*), *Campylobacter coli* (*C. coli*), DEC  
7  
8 (including EPEC, ETEC, EHEC, EAaggEC, EIEC)], and 5 viral pathogens (norovirus,  
9  
10 rotavirus, astrovirus, sapovirus, and enteric adenovirus). Bacteria were isolated using  
11  
12 different mediums at proper temperatures after preparation. The mediums included  
13  
14 ChromID *Vibrio* and TCBS for *V. cholera* and *V. parahaemolyticus*, MAC for DEC,  
15  
16 XLD for *Shigella* spp. and *Salmonella* spp., etc.. Bacteria were identified using  
17  
18 biochemical tests. An automatic biochemical identification system was used for DEC.  
19  
20 Serum agglutination tests were employed to subtype *Shigella* spp., *Salmonella* spp., *V.*  
21  
22 *cholera* and DEC. Astrovirus, norovirus, sapovirus and rotavirus were detected using  
23  
24 real-time reverse transcription- polymerase chain reaction assays (rRT-PCR) and  
25  
26 enteric adenovirus was detected using rPCR. All molecular assays were performed  
27  
28 using the appropriate respective commercial kits (Shanghai Zhijiang Biotechnology  
29  
30 Co., Ltd.) according to the manufacturer's instructions.  
31  
32  
33  
34  
35  
36  
37  
38 Samples were scored as positive if at least one of enteric pathogens was isolated or  
39  
40 identified. A bacterial infection means enteric bacteria was isolated and no viruses  
41  
42 were identified. A viral infection means enteric virus was identified and no bacteria  
43  
44 were isolated. Samples were scored as simplex infection if one of the 13 enteric  
45  
46 pathogens was isolated or identified; as a mixed infection if at least two of these  
47  
48 pathogens were isolated or identified; as a bacterial-viral mixed infection if at least  
49  
50 one bacteria was isolated and one virus was identified.  
51  
52  
53  
54  
55  
56  
57  
58  
59  
60

## Statistical Analysis

Data were analyzed using Statistical Analysis Software (SAS) version 9.3. Numbers and percentages were computed for categorical variables. Cochren-Mantel-Haenszel test was used for comparison of categorical variables. Binary logistic model and general logit model were used for binary dependent variables and multi-category disordered dependent variables respectively, to calculated adjusted odds ratio (aOR) and to explore the association between etiology and characteristics of infectious diarrhea after adjusting for confounders. Variables of age group, suburb, gender, season, and epidemiological histories were put into model and selected by stepwise methods. Age group, gender, suburb, season, consumption of suspicious food, medical history of enteric disease, and whether to keep a pet were included in the final model. Two-tailed p values  $< 0.05$  was considered statistically significant.

This study focused on the adult diarrhea patients with age  $\geq 18$  years. Age group was defined as 18-29,30-44, 45-59, and 60+ years, according to the Global Burden of Disease 2000 and surveillance diarrhea patients 'age distribution[20]. Patients who visited hospitals in suburb area were grouped in "suburb". Patients who visited hospitals in rural area were grouped in "rural". Season was defined by the climatic characteristics of Shanghai, spring means March to May, and summer means June to August, and autumn means September to November, and winter means December to February. Suspicious food meant the suspicious food that may cause diarrhea, such as food which was contaminated by diarrhea pathogen.

## Ethics

The study protocol was approved by the Institutional Ethics Review Committee of the Shanghai Municipal Center for Disease Control and Prevention.

## RESULTS

From 1 May 2012 through 31 May 2016, a total of 95284 patients were enrolled in Shanghai diarrhea comprehensive surveillance system, of whom 4571 (4.80%) were not included in this study for the following reasons: 401 (0.42%) patients did not report clinical signs of diarrhea, 379 (0.40%) patients visited the enteric disease clinics within 14 days and thus were considered as the same episodes, 11 (0.01%) patients sought clinical care > 60 days after onset of diarrhea, 212 (0.22%) patients were not infectious diarrhea with other explicit diagnosis, and 3568 (3.74%) patients were younger than 18 years. Among 90713 adult diarrhea patients, 8797 (9.70%) patients' stool samples were collected and detected. These 8797 patients were included for further analysis.

### 1. Prevalence of Enteric Bacteria and Viruses

A total of 4657 pathogens were identified or isolated from 4219 (positive rate 47.96%) stool samples of the 8797 samples. There are 1147 bacterial infections (27.19%), 2914 viral infections (69.07%) and 158 bacterial-viral mixed infections (infected with at least 1 bacteria and 1 virus, 3.74%). Excluding mixed-infection samples, *V. parahaemolyticus* infections, DEC infections and *Salmonella* spp. infections were the most frequently bacterial infections, respectively with positive rate 4.50%, 3.43% and

2.90%. Excluding mixed-infection samples, norovirus infections and rotavirus infections were the most frequently viral infections, with positive rates 19.82% and 8.12%, respectively. Positive rates of other enteric viral infections were as follows: sapovirus, 1.93%; astrovirus, 1.56%; and enteric adenovirus, 0.35%. Positive rates of enteric bacterial infections were as follows: *C.jejuni*, 1.13%; *Shigella* spp., 0.22%; *C. coli*, 0.08%; *Y. enterocolitica*, 0.01%; and *Staphylococcus aureus*, 0.01%. In addition, there were 343 (3.90%) mixed infections.

Isolated DEC consisted of 216 ETEC, 131 EPEC, 84 EAggEC, 2 EIEC and 1 EHEC. Identified noroviruses consisted of 281 GI and 1726 GII. Identified rotaviruses consisted of 766 rotavirus group A, 6 rotavirus group B and 15 rotavirus group C.

## 2. Demographic and Epidemiological Characteristics

The median age was 46 (IQR 30-60) years. Of 8797 patients, 22.94% aged 18-29 years, 24.57% aged 30-44 years, 25.79% aged 45-59 years, and 26.70% aged equal to or older than 60 years. A significantly difference in positive rate within different age groups could be found among comparison of positive and negative diarrhea patients ( $p=0.0150$ ), comparison of bacterial and viral and bacterial-viral infections ( $p=0.0074$ ), and comparison of different enteric pathogens infections ( $p<0.0001$ ) (Table 1). There were 4392 (49.93%) male patients, with a higher male proportion in positive diarrhea patients ( $p=0.0472$ ), DEC infections (aOR=1.29, 95%CI=1.02-1.64) and norovirus infections (aOR=1.22, 95%CI=1.08-1.36) (Table 1 and Table 2).



Table 1 Demographic and epidemiological characteristics of diarrhea outpatient adults by different infections

|                                                               | Positive<br>(n=4219) | Negative<br>(n=4578) | P                 | Bacterial<br>infections<br>(n=1147) | Viral<br>infections<br>(n=2914) | Bacterial-viral<br>Mixed<br>infections<br>(n=158) | P             | <i>V. parahaemolyticus</i> <sup>§</sup><br>(n=396) | DEC <sup>§</sup><br>(n=302) | <i>Salmonella</i><br>spp. <sup>§</sup><br>(n=255) | Norovirus <sup>§</sup><br>(n=1744) | Rotavirus <sup>§</sup><br>(n=714) | Other<br>infections <sup>§</sup><br>(n=808) | P                 |
|---------------------------------------------------------------|----------------------|----------------------|-------------------|-------------------------------------|---------------------------------|---------------------------------------------------|---------------|----------------------------------------------------|-----------------------------|---------------------------------------------------|------------------------------------|-----------------------------------|---------------------------------------------|-------------------|
| Gender, N (%)                                                 |                      |                      |                   |                                     |                                 |                                                   |               |                                                    |                             |                                                   |                                    |                                   |                                             |                   |
| Male                                                          | 2153 (51.03)         | 2239 (48.91)         | <b>0.0472</b>     | 577 (50.31)                         | 1497 (51.37)                    | 79 (50.00)                                        | 0.8005        | 184 (46.46)                                        | 164 (54.30)                 | 128 (50.20)                                       | 946 (54.24)                        | 326 (45.66)                       | 405 (50.12)                                 | <b>0.0011</b>     |
| Age, Positive rate (%)                                        |                      |                      |                   |                                     |                                 |                                                   |               |                                                    |                             |                                                   |                                    |                                   |                                             |                   |
| 18-29 years                                                   | 941 (46.70)          | 1074                 | <b>0.0150</b>     | 292 (14.49)                         | 611 (30.32)                     | 38 (1.89)                                         | <b>0.0074</b> | 109 (5.41)                                         | 74 (3.67)                   | 43 (2.13)                                         | 384 (19.06)                        | 118 (5.86)                        | 213 (10.57)                                 | <b>&lt;0.0001</b> |
| 30-44 years                                                   | 1084 (53.80)         | 1074                 |                   | 298 (14.79)                         | 748 (37.12)                     | 38 (1.89)                                         |               | 119 (5.91)                                         | 72 (3.57)                   | 57 (2.83)                                         | 473 (23.47)                        | 158 (7.84)                        | 205 (10.17)                                 |                   |
| 45-59 years                                                   | 1112 (55.19)         | 1153                 |                   | 294 (14.59)                         | 768 (38.11)                     | 50 (2.48)                                         |               | 105 (5.21)                                         | 78 (3.87)                   | 76 (3.77)                                         | 426 (21.14)                        | 231 (11.46)                       | 196 (9.73)                                  |                   |
| 60+ years                                                     | 1079 (53.55)         | 1266                 |                   | 262 (13.00)                         | 786 (39.01)                     | 31 (1.54)                                         |               | 63 (3.13)                                          | 78 (3.87)                   | 78 (3.87)                                         | 460 (22.83)                        | 207 (10.27)                       | 193 (9.58)                                  |                   |
| Living region, Positive rate (%)                              |                      |                      |                   |                                     |                                 |                                                   |               |                                                    |                             |                                                   |                                    |                                   |                                             |                   |
| Suburb                                                        | 2401 (44.66)         | 2975                 | <b>&lt;0.0001</b> | 665 (12.37)                         | 1645 (30.60)                    | 91 (1.69)                                         | 0.6661        | 257 (4.78)                                         | 170 (3.16)                  | 149 (2.77)                                        | 1019 (18.95)                       | 403 (7.50)                        | 403 (7.50)                                  | <b>&lt;0.0001</b> |
| Rural                                                         | 1818 (53.14)         | 1603                 |                   | 482 (14.09)                         | 1269 (37.09)                    | 67 (1.96)                                         |               | 139 (4.06)                                         | 132 (3.86)                  | 255 (3.10)                                        | 725 (21.19)                        | 311 (9.09)                        | 405 (11.84)                                 |                   |
| Epidemiological history, N (%)                                |                      |                      |                   |                                     |                                 |                                                   |               |                                                    |                             |                                                   |                                    |                                   |                                             |                   |
| Had a medical history of enteric disease in the past 6 months | 17 (0.40)            | 47 (1.03)            | <b>0.0006</b>     | 5 (0.44)                            | 12 (0.41)                       | 0 (0.00)                                          | 0.7132        | 1 (0.25)                                           | 1 (0.33)                    | 2 (0.78)                                          | 8 (0.46)                           | 2 (0.28)                          | 3 (0.37)                                    | 0.9001            |
| Had consumed suspicious food within 5 days before onset       | 1914 (45.37)         | 1865 (40.74)         | <b>&lt;0.0001</b> | 490 (42.72)                         | 1350 (46.33)                    | 74 (46.84)                                        | 0.1073        | 179 (45.20)                                        | 111 (36.75)                 | 117 (45.88)                                       | 847 (48.57)                        | 282 (39.50)                       | 378 (46.78)                                 | <b>&lt;0.0001</b> |
| Had went out within 7 days before onset                       | 78 (1.85)            | 46 (1.00)            | <b>0.0010</b>     | 29 (2.53)                           | 48 (1.65)                       | 1 (0.63)                                          | 0.0881        | 7 (1.77)                                           | 8 (2.65)                    | 5 (1.96)                                          | 34 (1.95)                          | 6 (0.84)                          | 18 (2.23)                                   | 0.3226            |
| Had kept or had contact with pets.                            | 814 (19.29)          | 604 (13.19)          | <b>&lt;0.0001</b> | 224 (19.53)                         | 556 (19.08)                     | 34 (21.52)                                        | 0.7304        | 55 (13.89)                                         | 65 (21.52)                  | 41 (16.08)                                        | 323 (18.52)                        | 123 (17.23)                       | 207 (25.62)                                 | <b>&lt;0.0001</b> |

§ Simplex infections;

Bold face:  $P < 0.05$

1  
2  
3  
4  
5  
6 Cochren-Mantel-Haenszel test was used for comparison of categorical variables.  
7  
8  
9  
10  
11  
12  
13  
14  
15  
16  
17  
18  
19  
20  
21  
22  
23  
24  
25  
26  
27  
28  
29  
30  
31  
32  
33  
34  
35  
36  
37  
38  
39  
40  
41  
42  
43  
44  
45  
46  
47

For peer review only

Table 2 Adjusted odds ratio of demographic and epidemiological characteristics comparing positive detection with negative detection in diarrhea outpatients\*

|                                                               | Positive<br>(n=4219)    | Bacterial infections<br>(n=1147) | Viral infections<br>(n=2914) | Bacterial-viral<br>Mixed infections<br>(n=158) | <i>V. parahaemolyticus</i> <sup>§</sup><br>(n=396) | DEC <sup>§</sup><br>(n=302) | <i>Salmonella</i> spp. <sup>§</sup><br>(n=255) | Norovirus <sup>§</sup><br>(n=1744) | Rotavirus <sup>§</sup> (n=714) |
|---------------------------------------------------------------|-------------------------|----------------------------------|------------------------------|------------------------------------------------|----------------------------------------------------|-----------------------------|------------------------------------------------|------------------------------------|--------------------------------|
| Male vs female                                                | 1.09 (1.00-1.19)        | 1.07 (0.94-1.22)                 | 1.1 (0.99-1.22)              | 1.04 (0.75-1.43)                               | 0.89 (0.72-1.09)                                   | <b>1.29 (1.02-1.64)</b>     | 1.11 (0.86-1.44)                               | <b>1.22 (1.08-1.36)</b>            | 0.88 (0.75-1.05)               |
| Age (years)                                                   |                         |                                  |                              |                                                |                                                    |                             |                                                |                                    |                                |
| 18-29                                                         | 1.10 (0.97-1.25)        | <b>1.32 (1.09-1.59)</b>          | 0.99 (0.85-1.14)             | 1.52 (0.93-2.44)                               | <b>1.92 (1.41-2.7)</b>                             | 1.11 (0.79-1.54)            | <b>0.64 (0.44-0.94)</b>                        | 1.03 (0.88-1.22)                   | <b>0.75 (0.58-0.97)</b>        |
| 30-44                                                         | <b>1.28 (1.14-1.45)</b> | <b>1.28 (1.06-1.56)</b>          | <b>1.28 (1.11-1.47)</b>      | 1.54 (0.94-2.50)                               | <b>2.04 (1.47-2.78)</b>                            | 1.02 (0.73-1.43)            | 0.83 (0.58-1.19)                               | <b>1.32 (1.12-1.56)</b>            | 1.08 (0.84-1.35)               |
| 45-59                                                         | <b>1.19 (1.06-1.35)</b> | 1.20 (1.00-1.47)                 | <b>1.16 (1.01-1.33)</b>      | <b>1.85 (1.18-2.94)</b>                        | <b>1.72 (1.25-2.38)</b>                            | 1.06 (0.77-1.47)            | 1.06 (0.76-1.47)                               | 1.09 (0.93-1.28)                   | <b>1.33 (1.08-1.67)</b>        |
| 60+ <sup>¶</sup>                                              | 1.00                    | 1.00                             | 1.00                         | 1.00                                           | 1.00                                               | 1.00                        | 1.00                                           | 1.00                               | 1.00                           |
| Suburb                                                        | <b>0.80 (0.72-0.88)</b> | <b>0.80 (0.68-0.92)</b>          | <b>0.80 (0.71-0.89)</b>      | 0.83 (0.58-1.19)                               | 0.96 (0.76-1.23)                                   | <b>0.75 (0.57-0.98)</b>     | 0.82 (0.62-1.09)                               | <b>0.85 (0.75-0.97)</b>            | <b>0.79 (0.66-0.95)</b>        |
| Had a medical history of enteric disease in the past 6 months | <b>0.41 (0.23-0.73)</b> | 0.42 (0.17-1.08)                 | <b>0.43 (0.22-0.85)</b>      | 0                                              | 0.24 (0.03-1.76)                                   | 0.34 (0.05-2.46)            | 0.71 (0.17-2.94)                               | 0.47 (0.21-1.01)                   | 0.32 (0.07-1.39)               |
| Had consumed suspicious food within 5 days before onset       | <b>1.18 (1.08-1.29)</b> | 1.06 (0.93-1.22)                 | <b>1.24 (1.12-1.38)</b>      | 1.26 (0.82-1.75)                               | 1.22 (0.99-1.51)                                   | 0.84 (0.66-1.08)            | 0.24 (0.96-1.61)                               | <b>1.31 (1.17-1.48)</b>            | 0.99 (0.83-1.18)               |
| Had kept or had contact with pets                             | <b>1.33 (1.17-1.5)</b>  | <b>1.57 (1.30-1.90)</b>          | <b>1.21 (1.04-1.40)</b>      | <b>1.62 (1.05-2.48)</b>                        | 1.17 (0.85-1.63)                                   | <b>1.79 (1.29-2.47)</b>     | 1.20 (0.83-1.75)                               | <b>1.26 (1.06-1.48)</b>            | 1.00 (0.78-1.27)               |

\* Data are adjusted odds ratio (95%CI) in binary logistic model or general logit model

§ Simplex infections

¶ Reference group in logistic regression model

Bold face:  $P < 0.05$

Adjusted odds ratios of age were shown in Table 2. Patients between 30-44 and 45-59 years were more likely to infectious diarrhea and viral diarrhea. Those aged 30-44 years were the most likely to *V. parahaemolyticus* (aOR versus 60+ years group: 2.04 [1.47-2.78]) and norovirus (aOR versus 60+ years group: 1.32 [1.12-1.56]). In addition, patients in 18-29 years group had a significantly lower odds of experiencing infectious diarrhea (aOR=0.85, 95% CI=0.76-0.97), viral infections (aOR=0.78, 95% CI=0.67-0.90), norovirus infections (aOR=0.78, 95% CI=0.66-0.92) and rotavirus infections (aOR=0.70, 95% CI=0.54-0.92) compared with 30-44 years group. Patients in 18-29 years group had a significantly lower odds of experiencing viral infections (aOR=0.85, 95% CI=0.74-0.98), *Salmonella* spp. infections (aOR=0.61, 95% CI=0.41-0.89) and rotavirus infections (aOR=0.56, 95% CI=0.44-0.72) compared with 45-59 years group. Patients in 30-44 years group had a significantly higher odds experiencing norovirus infections (aOR=1.22, 95% CI=1.03-1.43) compared with 40-45 years group.

Among diarrhea patients, 5376 (85.67%) visited the hospitals in suburb. The positive rates in suburb and rural groups were significantly different ( $p < 0.0001$ , Table 1). Comparing different enteric pathogen infections, the positive rates of patients in suburb and rural groups were significantly different ( $p < 0.0001$ ). More diarrhea patients infected with *V. parahaemolyticus* (64.90%) lived in suburb area. Patients living in suburb area were less likely to get infected with enteric pathogens (aOR=0.75-0.85) except *V. parahaemolyticus* infections and *Salmonella* spp. infections (Table 2).

64 (0.73%) patients had a medical history of enteric disease in the past 6 months. Within 5 days before onset, 3779 (42.96%) patients had a history of consuming suspicious food. 124 (1.41%) patients had a history of go out within 7 days before onset. And 1418 (16.12%) patients kept or had contact with pets. When compared with negative patients, a higher proportion of positive patients has a history of consuming suspicious food within 5 days before onset ( $p<0.0001$ ), had a history of going out within 7 days before onset ( $p=0.0010$ ), and kept or had contact with pets ( $p<0.0001$ ), while a lower proportion had a medical history of enteric disease in the past 6 months ( $p=0.0006$ ) (Table 1). Epidemiological history, including consuming suspicious food and keeping or contacting with pets, was significantly associated with higher odds of infectious diarrhea, viral infections and norovirus infections. A medical history of enteric disease was significantly associated with lower odds of infectious diarrhea (Table 2).

### 3. Clinical Symptoms

Of positive diarrhea patients, 13.11% reported fever, 41.91% reported nausea, 28.21% reported vomiting, and 49.09% reported abdominal pain (Table 3). Watery stool and loose stool were common, respectively accounting 76.27% and 20.93%. Compared with negative diarrhea patients, positive patients reported more fever ( $p=0.0009$ ), nausea ( $p<0.0001$ ), vomiting ( $p<0.0001$ ) and watery stool ( $p<0.0001$ ), while fewer abdominal pain ( $<0.0001$ ).

The distributions of clinical symptoms by different infections were significantly different (Table 3). Diarrhea patients infected with bacteria reported more fever

1  
2  
3 (19.09%,  $p<0.0001$ ), abdominal pain (64.60%,  $p<0.0001$ ) and loose stool (23.28%,  
4  
5  
6  $p<0.0001$ ). Diarrhea patients infected with virus reported more nausea (43.34%  
7  
8  $p=0.0175$ ), vomiting (30.13%,  $p=0.0001$ ) and watery stool (78.35%,  $p<0.0001$ ).  
9

10 Diarrhea patients infected with *V. parahaemolyticus* featured more nausea (56.27%),  
11  
12 vomiting (41.41%), abdominal pain (71.9%) and watery stool (81.57%). Patients  
13  
14 infected with DEC featured fewer nausea (28.81%) and vomiting (13.58%). Patients  
15  
16 infected with *Salmonella* spp. featured more fever (28.24%). Patients infected with  
17  
18 norovirus featured fewer fever (9.69%) and abdominal pain (44.55%).  
19  
20  
21  
22  
23  
24  
25  
26  
27  
28  
29  
30  
31  
32  
33  
34  
35  
36  
37  
38  
39  
40  
41  
42  
43  
44  
45  
46  
47  
48  
49  
50  
51  
52  
53  
54  
55  
56  
57  
58  
59  
60

**Table 3 Clinical symptoms in diarrhea outpatients by different infections**

|                       | Positive<br>(n=4219) | Negative<br>(n=4578) | <i>P</i>          | Bacterial<br>infections<br>(n=1147) | Viral<br>infections<br>(n=2914) | Bacterial-viral<br>Mixed<br>infections<br>(n=158) | <i>P</i>          | <i>V. parahaemolyticus</i> <sup>§</sup><br>(n=396) | DEC <sup>§</sup><br>(n=302) | <i>Salmonella</i><br>spp. <sup>§</sup><br>(n=255) | Norovirus <sup>§</sup><br>(n=1744) | Rotavirus <sup>§</sup><br>(n=714) | Other<br>infections <sup>§</sup><br>(n=808) | <i>P</i>          |
|-----------------------|----------------------|----------------------|-------------------|-------------------------------------|---------------------------------|---------------------------------------------------|-------------------|----------------------------------------------------|-----------------------------|---------------------------------------------------|------------------------------------|-----------------------------------|---------------------------------------------|-------------------|
| Fever, N (%)          | 553 (13.11)          | 495 (10.81)          | <b>0.0009</b>     | 219 (19.09)                         | 312 (10.71)                     | 22 (13.92)                                        | <b>&lt;0.0001</b> | 46 (11.62)                                         | 43 (14.24)                  | 72 (28.24)                                        | 169 (9.69)                         | 96 (13.45)                        | 127 (15.72)                                 | <b>&lt;0.0001</b> |
| Nausea, N (%)         | 1768 (41.91)         | 1561 (34.10)         | <b>&lt;0.0001</b> | 442 (38.54)                         | 1263 (43.34)                    | 63 (39.87)                                        | <b>0.0175</b>     | 224 (56.27)                                        | 87 (28.81)                  | 71 (27.84)                                        | 790 (45.30)                        | 309 (43.28)                       | 287 (35.52)                                 | <b>&lt;0.0001</b> |
| Vomiting, N (%)       | 1190 (28.21)         | 916 (20.01)          | <b>&lt;0.0001</b> | 269 (23.45)                         | 878 (30.13)                     | 43 (27.22)                                        | <b>0.0001</b>     | 164 (41.41)                                        | 41 (13.58)                  | 37 (14.51)                                        | 595 (34.12)                        | 195 (27.31)                       | 158 (19.55)                                 | <b>&lt;0.0001</b> |
| Abdominal pain, N (%) | 2071 (49.09)         | 2446 (53.43)         | <b>&lt;0.0001</b> | 741 (64.60)                         | 1257 (43.14)                    | 73 (46.20)                                        | <b>&lt;0.0001</b> | 285 (71.97)                                        | 170 (56.29)                 | 151 (59.22)                                       | 777 (44.55)                        | 321 (44.96)                       | 367 (45.42)                                 | <b>&lt;0.0001</b> |
| Fecal property, N (%) |                      |                      |                   |                                     |                                 |                                                   |                   |                                                    |                             |                                                   |                                    |                                   |                                             |                   |
| Watery                | 3218 (76.27)         | 3150 (68.81)         | <b>&lt;0.0001</b> | 814 (70.97)                         | 2283 (78.35)                    | 121 (76.58)                                       | <b>&lt;0.0001</b> | 323 (81.57)                                        | 202 (66.89)                 | 179 (70.20)                                       | 1344 (77.06)                       | 583 (81.65)                       | 587 (72.65)                                 | <b>&lt;0.0001</b> |
| Loose                 | 883 (20.93)          | 1202 (26.26)         |                   | 267 (23.28)                         | 583 (20.01)                     | 33 (20.89)                                        |                   | 54 (13.64)                                         | 85 (28.15)                  | 61 (23.92)                                        | 372 (21.33)                        | 121 (16.95)                       | 190 (23.51)                                 |                   |
| Mucous                | 72 (1.71)            | 143 (3.12)           |                   | 38 (3.31)                           | 31 (1.06)                       | 3 (1.90)                                          |                   | 8 (2.02)                                           | 11 (3.64)                   | 11 (4.31)                                         | 18 (1.03)                          | 6 (0.84)                          | 18 (2.23)                                   |                   |
| Else                  | 46 (1.09)            | 83 (1.81)            |                   | 28 (2.44)                           | 17 (0.58)                       | 1 (0.63)                                          |                   | 11 (2.78)                                          | 4 (1.32)                    | 4 (1.57)                                          | 10 (0.57)                          | 4 (0.56)                          | 13 (1.61)                                   |                   |

§ Simplex infections;

Bold face:  $P < 0.05$

Cochren-Mantel-Haenszel test was used for comparison of categorical variables

#### 4. Pathogen Spectrum and Seasonality

In term of descriptive data, the enteric pathogens spectrum of infectious diarrhea patients displayed a yearly seasonal trend (Figure 1). In general, viruses were predominant during November to March of every seasonal cycle, accounting for more than 80% in every month. Bacteria were predominant during June to August of almost every seasonal cycle, accounting for more than 60% in every month. September and October were the transition period from bacteria to viruses, and April and May were the transition period from viruses to bacteria. Norovirus and rotavirus both showed yearly seasonal trends. Rotavirus peaked in winter months, especially in December and January. Norovirus displayed a less distinct and broader seasonality. Norovirus clustered around autumn and winter, while a smaller peak appeared in March of 2014 and 2015. In the seasonal cycle from 2015-2016, norovirus peaked in March 2016. *V. parahaemolyticus*, DEC and *Salmonella* spp. all showed yearly seasonal trends. These three enteric bacteria peaked in August, and *Salmonella* spp. showed a smaller peak (Figure 2).

Figure 1 insert here.

Figure 2 insert here.

In term of statistical analysis, there were significantly different season distribution in comparison of positive and negative diarrhea patients ( $p < 0.0001$ ), comparison of bacterial and viral and bacterial-viral infections ( $p < 0.0001$ ), and comparison of different enteric pathogens infections ( $p < 0.0001$ ). More bacterial infections appeared in summer (54.58%) and more viral infections appeared in winter (44.51%). The



1  
2  
3 proportion of winter was lower among norovirus infections (34.86%) compared with  
4  
5 among rotavirus infections (67.37%).  
6  
7

8 Patients in summer were 1.55-4.39 times more likely to have simplex bacterial  
9  
10 diarrhea and 0.16-0.20 times less likely to have simplex viral diarrhea compared with  
11  
12 in spring. Patients in autumn were 2.02-3.38 times more likely to have *V.*  
13  
14 *parahaemolyticus* infections and DEC infections, and 0.69-0.77 times less likely to  
15  
16 have simplex viral diarrhea compared with in spring. Patients in winter were  
17  
18 1.60-5.61 times more likely to have simplex viral infections, and 0.14-0.56 times less  
19  
20 likely to have simplex bacterial diarrhea compared with in spring (Table 4).  
21  
22  
23  
24  
25  
26  
27  
28  
29  
30  
31  
32  
33  
34  
35  
36  
37  
38  
39  
40  
41  
42  
43  
44  
45  
46  
47  
48  
49  
50  
51  
52  
53  
54  
55  
56  
57  
58  
59  
60

**Table 4 Seasonality of diarrhea outpatients by different infections\***

|                      | Negative<br>(n=4578) | Positive<br>(n=4219)      | Bacterial<br>infections<br>(n=1147) | Viral infections<br>(n=2914) | Bacterial-viral<br>Mixed<br>infections<br>(n=158) | <i>V. parahaemolyticus</i> <sup>§</sup><br>(n=396) | DEC <sup>§</sup><br>(n=302) | <i>Salmonella</i><br>spp. <sup>§</sup> (n=255) | Norovirus <sup>§</sup><br>(n=1744) | Rotavirus <sup>§</sup><br>(n=714) |
|----------------------|----------------------|---------------------------|-------------------------------------|------------------------------|---------------------------------------------------|----------------------------------------------------|-----------------------------|------------------------------------------------|------------------------------------|-----------------------------------|
| Season [ (No.(%) ]   |                      | <b><i>P</i>&lt;0.0001</b> | <b><i>P</i>&lt;0.0001</b>           |                              |                                                   | <b><i>P</i>&lt;0.0001</b>                          |                             |                                                |                                    |                                   |
| Spring               | 867 (18.94)          | 877 (20.79)               | 149 (12.99)                         | 695 (23.85)                  | 33 (20.89)                                        | 34 (8.59)                                          | 21 (6.95)                   | 41 (16.08)                                     | 462 (26.49)                        | 101 (14.15)                       |
| Summer               | 1746 (38.14)         | 927 (21.97)               | 626 (54.58)                         | 260 (8.92)                   | 41 (25.95)                                        | 252 (63.64)                                        | 178 (58.94)                 | 123 (48.24)                                    | 180 (10.32)                        | 32 (4.48)                         |
| Autumn               | 1238 (27.04)         | 1031 (24.44)              | 322 (28.07)                         | 662 (22.72)                  | 47 (29.75)                                        | 106 (26.77)                                        | 96 (31.79)                  | 72 (28.24)                                     | 494 (28.33)                        | 100 (14.01)                       |
| Winter               | 727 (15.88)          | 1384 (32.80)              | 50 (4.36)                           | 1297 (44.51)                 | 37 (23.42)                                        | 4 (1.01)                                           | 7 (2.32)                    | 19 (7.45)                                      | 608 (34.86)                        | 481 (67.37)                       |
| Season [aOR (95%CI)] |                      |                           |                                     |                              |                                                   |                                                    |                             |                                                |                                    |                                   |
| Spring <sup>¶</sup>  |                      | 1.00                      | 1.00                                | 1.00                         | 1.00                                              | 1.00                                               | 1.00                        | 1.00                                           | 1.00                               | 1.00                              |
| summer               |                      | <b>0.54 (0.48-0.61)</b>   | <b>2.16 (1.77-2.64)</b>             | <b>0.18 (0.16-0.23)</b>      | 0.62 (0.39-1.00)                                  | <b>3.65 (2.53-5.29)</b>                            | <b>4.39 (2.77-6.96)</b>     | <b>1.55 (1.07-2.23)</b>                        | <b>0.20 (0.17-0.24)</b>            | <b>0.16 (0.10-0.24)</b>           |
| autumn               |                      | <b>0.85 (0.75-0.97)</b>   | 1.59 (0.28-1.97)                    | <b>0.69 (0.60-0.79)</b>      | 1.04 (0.66-1.65)                                  | <b>2.2 (1.48-3.28)</b>                             | <b>3.38 (2.09-5.47)</b>     | 1.26 (0.85-1.87)                               | <b>0.77 (0.66-0.9)</b>             | <b>0.69 (0.52-0.93)</b>           |
| winter               |                      | <b>1.91 (1.67-2.18)</b>   | <b>0.40 (0.29-0.56)</b>             | <b>2.26 (1.98-2.59)</b>      | 1.36 (0.84-2.20)                                  | <b>0.14 (0.05-0.40)</b>                            | <b>0.39 (0.16-0.92)</b>     | <b>0.56 (0.32-0.97)</b>                        | <b>1.60 (1.37-1.88)</b>            | <b>5.61 (4.42-7.11)</b>           |

\* Data are adjusted odds ratio (95%CI) in binary logistic model or general logit model

§ Simplex infections;

¶ Reference group in logistic regression model

Bold face:  $P < 0.05$

Cochren-Mantel-Haenszel test was used for comparison of categorical variables

## DISCUSSION

This study is the first study in Shanghai identifying the etiology and epidemiology of adult infectious diarrhea in sporadic outpatients from a continuous active diarrhea surveillance enhanced with comprehensive laboratory testing for common enteric bacteria and virus. It also adds to the limited number of studies investigating adult cases of infectious diarrhea in China. The Shanghai Diarrhea Comprehensive Surveillance System used Probability Proportionate to Size (PPS) sampling method and was conducted among 22 sentinel hospitals in all 16 districts of Shanghai continuously since May 2012, data from which are more representative and more feasible to be extrapolated to the city's population by avoiding the influence of clusters and season-specific cases.

Etiology of adult infectious diarrhea in Shanghai was detailed in this study. At least one enteric pathogen was found in 47.96% adult diarrhea patients' stools. Viral infections are predominant and bacteria were isolated from many cases. These findings were consistent with those Wang's research in Beijing[2]. We found that norovirus was the most common enteric pathogen, accounting for over 40% of all cases, followed by rotavirus, *V. parahaemolyticus*, DEC and *Salmonella* spp.. The proportion of norovirus was higher than the sum proportion of rotavirus, *V. parahaemolyticus*, DEC and *Salmonella* spp.. This result confirmed norovirus's leading role in adult infectious diarrhea in China, and was similar to the research finding in sporadic gastroenteritis in both developing and developed countries [21-24]. And it is observed that norovirus infections were more than twice as that of rotavirus in adult patients in Shanghai. Rotavirus ranked second to norovirus. This results was consistent with studies in Russia [24] and Shanghai, China[25], while inconsistent with study in France[26]. Yet according to WHO, rotavirus are most common etiological agents of diarrhea in developing countries, which may due to rotavirus's important role in children. As leading cause of severe diarrhea in children, the pathogenic role and disease burden of rotavirus in adults had been underestimated. Rotavirus needs more attention in routine clinical diagnosis and vaccination

1 program.

2  
3 According to this study, *V. parahaemolyticus*, DEC and *Salmonella* spp. were common bacteria in adult  
4 infectious diarrhea. The prevalence of these three bacterial infections was similar between 2.90~4.50%,  
5  
6 much lower than viral infections. In previous studies, *V. parahaemolyticus*, DEC and *Salmonella* spp. were  
7  
8 also among the most prevalent pathogen in adult infectious diarrhea in different regions of China and  
9  
10 worldwide[1, 2, 17, 18, 27]. Although diarrhea due to *V. parahaemolyticus* decreased since 1998[28, 29], *V.*  
11  
12 *parahaemolyticus* was still the leading cause of adult bacterial infections in this study. However, *Shigella*  
13  
14 spp. was also among frequent bacteria in several studies before 2013[18, 28, 29]. This study showed that  
15  
16 positive rate of *Shigella* spp. infections was only 0.22% during 2012-2016 in Shanghai, which may due to  
17  
18 the downward trend of *Shigella* spp. infections over time [29].  
19  
20  
21  
22  
23  
24

25 This study showed that there was association between adult infectious diarrhea and patient age. In general,  
26  
27 patients between 30-59 years were more likely to have infectious diarrhea and viral diarrhea than age groups  
28  
29 of 18-29 and 60+ years. This was partly consistent with a study in France which found incidence of acute  
30  
31 diarrhea in youth group was higher than elderly group [26]. Elderly people ( $\geq 60$ years) were the least likely  
32  
33 to get infected with *V. parahaemolyticus*, whereas people aged 30-44 years were the most likely among adult  
34  
35 age groups. The similar findings were observed in a study in Shanghai[29]. This may be related to more  
36  
37 seafood consumption in young adults, which is an important risk factor in *V. parahaemolyticus*  
38  
39 infections[30]. In contrast to other studies which found elderly people more likely to norovirus[22, 31], our  
40  
41 study discovered that the highest proportion in norovirus infections was 30-44 years old. And considering  
42  
43 the results of general logit model adjusting for other factors, 30-44 years patients were the most likely to  
44  
45 norovirus. Patients aged 18-29 years had the lowest odds experiencing rotavirus diarrhea.  
46  
47  
48  
49

50 People living in rural area were more susceptible to DEC, norovirus and rotavirus, which may because city  
51  
52 environment provided more chance for pathogen to transmit.  
53  
54  
55  
56

1 In regarding to clinical symptoms in general, bacterial diarrhea was characterized by fever, abdominal pain  
2  
3 and loose stool, while viral diarrhea was characterized by nausea, vomiting and watery stool. However the  
4  
5 symptom of *V. parahaemolyticus* infections showed more like viral infections. In addition, abdominal pain  
6  
7 was common in *V. parahaemolyticus* infections. These findings of *V. parahaemolyticus* were in accordance  
8  
9 with a research in Shanghai during 1998-2013[28]. The symptoms of DEC and *Salmonella* spp. were similar  
10  
11 except fever. The proportion of fever was highest in *Salmonella* spp. (28.24%) while lowest in norovirus  
12  
13 (9.69%). The proportion of fever in norovirus infections was much lower in comparison with some  
14  
15 studies[26, 31], while the proportion in *Salmonella* spp. infections was close to another research [28]. The  
16  
17 proportion of abdominal pain was highest in *V. parahaemolyticus* (71.97%) while much lower in norovirus  
18  
19 (44.55%) and rotavirus (44.96%).  
20  
21  
22  
23  
24

25 This study also demonstrated the seasonality of adult infectious diarrhea and relevant contribution of  
26  
27 different enteric pathogens in seasonal trend. A seasonal distribution of adult infectious diarrhea was  
28  
29 observed with a large peak in winter and a small peak in summer. Winter peak was mainly due to norovirus  
30  
31 and rotavirus, which was in line with previous study[32, 33]. Summer peak was smaller, due to low  
32  
33 proportion of bacterial infections. What should be noted was that there was a peak around March due to  
34  
35 norovirus in 2014-2016, ever higher than the summer peak in 2015-2016 season cycle. This emerging spring  
36  
37 peak was possibly because of the increased activity of a novel norovirus GII.17 [34]. Rotavirus showed a  
38  
39 distinct peak in December and January (significantly winter VS summer aOR=35.67), which was consistent  
40  
41 with researches in Shanghai and Iran [25, 35], while different from a study in London (peak from January  
42  
43 through May) [36] and a study in Russia (peak from December through May) [24]. However, norovirus  
44  
45 displayed a broader seasonality peaking around autumn and winter (significantly winter VS summer  
46  
47 OR=8.00) in this study and a study in Netherland [9]. Bacterial infections, included *V. parahaemolyticus*,  
48  
49 DEC and *Salmonella* spp., showed a yearly seasonality peaking in summer (often in August), with  
50  
51  
52  
53  
54  
55  
56  
57  
58  
59  
60

1 significantly summer VS winter OR 25.00, 11.11 and 2.78 respectively. This was similar in Enserink's study  
2  
3 [9], whereas autumn peak of bacterial infections was observed in some studies [25, 37]. The seasonality of  
4  
5 infectious diarrhea may due to the climate, biological characteristics of pathogens and people's diet habit of  
6  
7 Shanghai.

8  
9  
10 There are several limitations that need to be acknowledged. First, information and detection results were  
11  
12 collected from 22 hospitals and 16 laboratories. Though detection methods & materials were unified and  
13  
14 regular trainings were hold, there was still a chance of bias caused by the different levels and conditions of  
15  
16 hospitals and laboratories. Admission rate bias should also be taken into consideration as patients may have  
17  
18 a preference when visiting hospitals of different levels or in different regions. Second, the recall bias of  
19  
20 epidemiological information was difficult to avoid. And the data of exposure history was important for  
21  
22 infectious diarrhea. Third, only diarrhea patients who visited the enteric disease clinics were included in  
23  
24 surveillance, severe diarrhea patients or asymptomatic patients were possibly not studies in our research.  
25  
26 Fourth, as for seasonality, only descriptive data of every month or statistical tests of seasons were  
27  
28 demonstrated. No statistical methods were used to analyze the successive time series, which was because of  
29  
30 the limit seasonal cycles of existing data. In the future, after accumulating enough data during several years,  
31  
32 time series analysis could be taken to explore the inherent natural order and to forecasting prospective trend.  
33  
34  
35  
36  
37  
38  
39

## 40 CONCLUSIONS

41  
42  
43 In conclusion, this study provides a detailed picture about the epidemiology, etiology and seasonal pathogen  
44  
45 spectrum of adult infectious diarrhea in Shanghai. Viral infections are predominant, and norovirus is the  
46  
47 most common enteric pathogen detected in our surveillance. Other common pathogens include rotavirus, *V.*  
48  
49 *parahaemolyticus*, DEC and *Salmonella* spp.. Patients between 30-59 years were more likely to infectious  
50  
51 diarrhea and viral diarrhea. A seasonal distribution was observed with larger peaks in winter and smaller  
52  
53 peaks in summer. Winter peak was mainly due to norovirus and rotavirus, and summer peak was due to  
54  
55  
56

1 bacterial infections. An emerging spring peak of norovirus around March was observed in recent 3 years.  
2  
3 Our findings highlight the necessity for conducting an active, comprehensive surveillance for both bacterial  
4  
5 and viral enteric pathogens in adults, to monitor the changing dynamics in the epidemiology and etiology of  
6  
7 infectious diarrhea. These findings promote to understand adult infectious diarrhea thoroughly and to  
8  
9 develop targeted prevention strategies.  
10  
11

## 12 13 **LIST OF ABBREVIATIONS**

14  
15  
16 aOR: Adjusted odds ratio; *C. coli*: *Campylobacter coli*; *C. jejuni*: *Campylobacter jejuni*; DEC:  
17  
18 *Diarrheagenic Escherichia coli*; EAggEC: Enteroaggregative escherichia coli; EHEC: Enterohemorrhagic  
19  
20 escherichia coli; EIEC: Enteroinvasive escherichia coli; EPEC: Enteropathogenic escherichia coli; ETEC:  
21  
22 Enterotoxigenic escherichia coli; PPS: Probability Proportionate to Size; rRT-PCR: real-time Reverse  
23  
24 Transcription -Polymerase Chain Reaction; SAS: Statistical Analysis Software; *V. cholera*: *Vibrio cholera*; *V.*  
25  
26 *parahaemolyticus*: *Vibrio parahaemolyticus*; WHO: World Health Organization; *Y. enterocolitica*: *Yersinia*  
27  
28 *enterocolitica*;  
29  
30  
31  
32  
33

## 34 **COMPETING INTERESTS**

35  
36  
37 The authors declare that they have no competing interests.  
38  
39

## 40 **AUTHORS' CONTRIBUTIONS**

41  
42  
43 Xiao-huan Gong performed the statistical analysis and drafted the manuscript. Hao Pan and Huan-yu Wu  
44  
45 placed the surveillance system into effect. Jian Li designed the study of the surveillance system. Wen-jia  
46  
47 Xiao participated in the management of the system. Xi Zhang, Min Chen and Zheng Teng carried out the  
48  
49 management and quality control of the laboratory tests. Zheng-an Yuan conceived of the study. All authors  
50  
51 read and approved of the final manuscript.  
52  
53  
54  
55  
56  
57

## ACKNOWLEDGMENTS

The authors of this study thank all of the patients, the public health workers in the CDCs and health-care workers in the hospitals involved in the surveillance. We are grateful to Fan Wu and Yi He for their intellectual contributions to the study's design. We are grateful to Martin C. W. Chan and She-Lan Liu for their valuable revision advice on the manuscript.

## FUNDING

This work was supported by the 4th Round of Three Years Action Plan on Public of Health of Shanghai: Key Discipline-Epidemiology and Hygiene Microbiology (No. 15GWZK0101), Shanghai Public Health Professional Overseas Training Grant (No. GWTD2015S02), from the Shanghai Municipal Commission of Health & Family Planning.

## DATA SHARING STATEMENT

No additional data are available for public sharing.

## References

1. The World Health Organization, *Diarrhoeal disease*. 2013.
2. Wang, X., et al., *Etiology of Childhood Infectious Diarrhea in a Developed Region of China: Compared to Childhood Diarrhea in a Developing Region and Adult Diarrhea in a Developed Region*. PLoS One, 2015. **10**(11): p. e0142136.
3. Chan, S.S., et al., *Acute bacterial gastroenteritis: a study of adult patients with positive stool cultures treated in the emergency department*. Emerg Med J, 2003. **20**(4): p. 335-8.
4. Thapar, N. and I.R. Sanderson, *Diarrhoea in children: an interface between developing and developed countries*. Lancet, 2004. **363**(9409): p. 641-53.
5. Podewils, L.J., et al., *Acute, infectious diarrhea among children in develop-ing countries*. Seminars in Pediatric Infectious Diseases, 2004. **15**(3): p. 155-168.
6. GBD 2015 Mortality and Causes of Death Collaborators, *Global, regional, and national life expectancy, all-cause mortality, and cause-specific mortality for 249 causes of death, 1980 - 2015: a systematic analysis for the Global Burden of Disease Study 2015*. Lancet, 2016. **388**(10053): p. 1459-544.
7. JONES, T.F., et al., *A population-based estimate of the substantial burden of diarrhoeal disease in the United States; FoodNet, 1996 - 2003*. 2007. p. 293-301.
8. Benhafid, M., et al., *Epidemiology of Rotavirus Gastroenteritis among Children <5 Years of Age in Morocco during 1 Year of Sentinel Hospital Surveillance, June 2006 - May 2007*. The Journal of Infectious Diseases, 2009. **200**(s1): p. S70-S75.



9. Enserink, R., et al., *Gastroenteritis Attributable to 16 Enteropathogens in Children Attending Day Care*. 2015. p. 5-10.
10. Chhabra, P., et al., *Etiology of Viral Gastroenteritis in Children <5 Years of Age in the United States, 2008-2009*. The Journal of Infectious Diseases, 2013. **208**(5): p. 790-800.
11. Grant, L., et al., *Epidemiologic and clinical features of other enteric viruses associated with acute gastroenteritis in American Indian infants*. J Pediatr, 2012. **161**(1): p. 110-5.e1.
12. Fletcher, S., et al., *Gastrointestinal pathogen distribution in symptomatic children in Sydney, Australia*. J Epidemiol Glob Health, 2013. **3**(1): p. 11-21.
13. Sambe-Ba, B., et al., *Community-acquired diarrhea among children and adults in urban settings in Senegal: clinical, epidemiological and microbiological aspects*. BMC Infectious Diseases, 2013. **13**: p. 580.
14. Franck, K.T., et al., *Norovirus epidemiology in community and health care settings and association with patient age, Denmark*. 2014. p. 1123-31.
15. Parry, C.M., et al., *A retrospective study of secondary bacteraemia in hospitalised adults with community acquired non-typhoidal Salmonella gastroenteritis*. BMC Infectious Diseases, 2013. **13**: p. 107.
16. Lozano, R., et al., *Global and regional mortality from 235 causes of death for 20 age groups in 1990 and 2010: a systematic analysis for the Global Burden of Disease Study 2010*. Lancet, 2012. **380**(9859): p. 2096-2128.
17. Dong, B., et al., *Bacterial Etiologies of Five Core Syndromes: Laboratory-Based Syndromic Surveillance Conducted in Guangxi, China*. PLoS One, 2014. **9**(10): p. e110876.
18. Qu, M., et al., *Etiology of acute diarrhea due to enteropathogenic bacteria in Beijing, China*. Journal of Infection, 2012. **65**(3): p. 214-222.
19. WHO, *Diarrhoea*. <http://www.who.int/topics/diarrhoea/en/>. 2016.
20. Mathers, C.D., et al., *Global Burden of Disease 2000: Version 2 methods and results*. 2002, WHO.
21. Tam, C.C., et al., *Longitudinal study of infectious intestinal disease in the UK (IID2 study): incidence in the community and presenting to general practice*. Gut, 2012. **61**(1): p. 69-77.
22. Patel, M.M., et al., *Systematic literature review of role of noroviruses in sporadic gastroenteritis*. Emerg Infect Dis, 2008. **14**(8): p. 1224-31.
23. Morillo, S.G. and M.C. Timenetsky, *Norovirus: an overview*. Rev Assoc Med Bras (1992), 2011. **57**(4): p. 453-8.
24. Podkolzin, A.T., et al., *Hospital - Based Surveillance of Rotavirus and Other Viral Agents of Diarrhea in Children and Adults in Russia, 2005 - 2007*. The Journal of Infectious Diseases, 2009. **200**(s1): p. S228-S233.
25. Wang, Y., J. Zhang and P. Liu, *Clinical and molecular epidemiologic trends reveal the important role of rotavirus in adult infectious gastroenteritis, in Shanghai, China*. Infect Genet Evol, 2016.
26. Arena, C., et al., *Acute diarrhea in adults consulting a general practitioner in France during winter: incidence, clinical characteristics, management and risk factors*. BMC Infectious Diseases, 2014. **574** (14): p. 1-7.
27. Liu, H.X. and J. Zhang, *[Analysis of reported infectious diarrhea (other than cholera, dysentery, typhoid and paratyphoid) in China in 2011]*. Zhonghua Yu Fang Yi Xue Za Zhi, 2013. **47**(4): p. 328-32.
28. Qi, X.L., et al., *Incidence rates and clinical Symptoms of Salmonella, Vibrio parahaemolyticus, and Shigella infections in China, 1998-2013*. J Infect Dev Ctries, 2016. **10**(2): p. 127-33.
29. Zhang, Y., et al., *Analysis of bacterial pathogens causing acute diarrhea on the basis of sentinel surveillance in Shanghai, China, 2006-2011*. Jpn J Infect Dis, 2014. **67**(4): p. 264-8.
30. Su, Y. and C. Liu, *Vibrio parahaemolyticus: A concern of seafood safety*. Food Microbiology, 2007. **24**(6): p. 549-558.
31. Tang, M.B., et al., *Epidemiological and molecular analysis of human norovirus infections in Taiwan during 2011 and 2012*. BMC Infectious Diseases, 2013. **13**: p. 338.
32. Karsten, C., et al., *Incidence and risk factors for community-acquired acute gastroenteritis in north-west Germany in 2004*. 2009. **28**(8): p. 935 - 43.
33. de Wit, M.A., et al., *Gastroenteritis in sentinel general practices, The Netherlands*. 2001. **7**(1): p. 82 - 91.
34. Gao, Z., et al., *Increased norovirus activity was associated with a novel norovirus GII.17 variant in Beijing, China during winter 2014 - 2015*. BMC Infectious Diseases, 2015. **15**(1).

- 1  
2  
3  
4  
5  
6  
7  
8  
9  
10  
11  
12  
13  
14
35. Eesteghamati, A., et al., *Sentinel Hospital - Based Surveillance of Rotavirus Diarrhea in Iran*. The Journal of Infectious Diseases, 2009. **200**(s1): p. S244-S247.
  36. Iturriza Gómara, M., et al., *Rotavirus Surveillance in Europe, 2005 - 2008: Web - Enabled Reporting and Real - Time Analysis of Genotyping and Epidemiological Data*. The Journal of Infectious Diseases, 2009. **200**(s1): p. S215-S221.
  37. Liang, Z., et al., *Serotypes, seasonal trends, and antibiotic resistance of non-typhoidal Salmonella from human patients in Guangdong Province, China, 2009 - 2012*. BMC Infectious Diseases, 2015. **15**(1): p. 53.

15  
16  
17  
18  
19  
20  
21

**Figure 1 Pathogen spectrum of major enteric pathogens in adults with infectious diarrhea by month in Shanghai, May 2012-May 2016**

22  
23  
24  
25  
26  
27  
28  
29  
30  
31  
32  
33  
34  
35  
36  
37  
38  
39  
40  
41  
42  
43  
44  
45  
46  
47  
48  
49  
50  
51  
52  
53  
54  
55  
56  
57  
58  
59  
60

**Figure2 Seasonality of major enteric pathogens in adult with infectious diarrhea in Shanghai, May 2012-May 2016**

1  
2  
3  
4  
5  
6  
7  
8  
9  
10  
11  
12  
13  
14  
15  
16  
17  
18  
19  
20  
21  
22  
23  
24  
25  
26  
27  
28  
29  
30  
31  
32  
33  
34  
35  
36  
37  
38  
39  
40  
41  
42  
43  
44  
45  
46  
47  
48  
49  
50  
51  
52  
53  
54  
55  
56  
57  
58  
59  
60

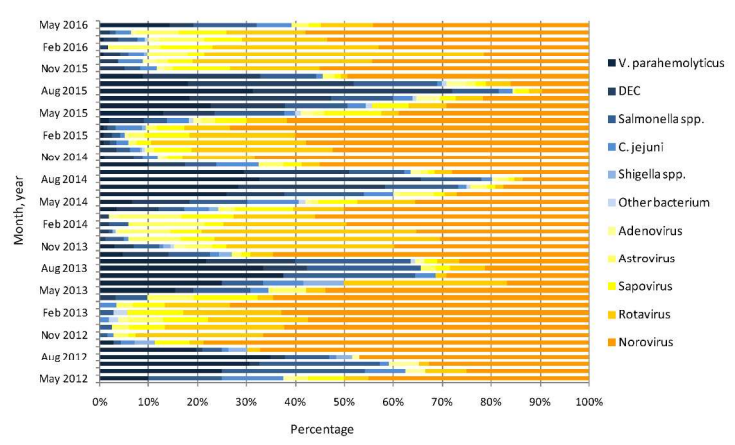

Figure 1 Pathogen spectrum of major enteric pathogens in adults with infectious diarrhea by month in Shanghai, May 2012-May 2016

Figure 1 Pathogen spectrum of major enteric pathogens in adults with infectious diarrhea by month in Shanghai, May 2012-May 2016

297x210mm (300 x 300 DPI)

View only

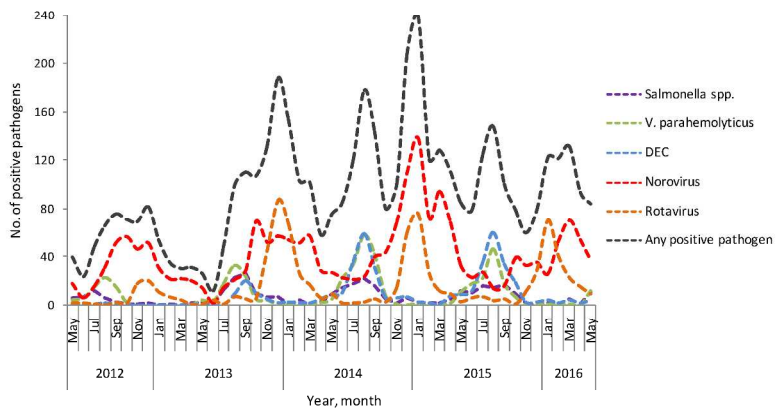

Figure2 Seasonality of major enteric pathogens in adult with infectious diarrhea in Shanghai, May 2012-May 2016

Figure2 Seasonality of major enteric pathogens in adult with infectious diarrhea in Shanghai, May 2012-May 2016

297x210mm (300 x 300 DPI)

STROBE 2007 (v4) Statement—Checklist of items that should be included in reports of *cross-sectional studies*

| Section/Topic                | Item # | Recommendation                                                                                                                                                                       | Reported on page # |
|------------------------------|--------|--------------------------------------------------------------------------------------------------------------------------------------------------------------------------------------|--------------------|
| Title and abstract           | 1      | (a) Indicate the study’s design with a commonly used term in the title or the abstract                                                                                               | 3                  |
|                              |        | (b) Provide in the abstract an informative and balanced summary of what was done and what was found                                                                                  | 3                  |
| <b>Introduction</b>          |        |                                                                                                                                                                                      |                    |
| Background/rationale         | 2      | Explain the scientific background and rationale for the investigation being reported                                                                                                 | 6                  |
| Objectives                   | 3      | State specific objectives, including any prespecified hypotheses                                                                                                                     | 7                  |
| <b>Methods</b>               |        |                                                                                                                                                                                      |                    |
| Study design                 | 4      | Present key elements of study design early in the paper                                                                                                                              | 7-8                |
| Setting                      | 5      | Describe the setting, locations, and relevant dates, including periods of recruitment, exposure, follow-up, and data collection                                                      | 7-8                |
| Participants                 | 6      | (a) Give the eligibility criteria, and the sources and methods of selection of participants                                                                                          | 7-8                |
| Variables                    | 7      | Clearly define all outcomes, exposures, predictors, potential confounders, and effect modifiers. Give diagnostic criteria, if applicable                                             | 8-9                |
| Data sources/<br>measurement | 8*     | For each variable of interest, give sources of data and details of methods of assessment (measurement). Describe comparability of assessment methods if there is more than one group | 7-10               |
| Bias                         | 9      | Describe any efforts to address potential sources of bias                                                                                                                            | 7-10               |
| Study size                   | 10     | Explain how the study size was arrived at                                                                                                                                            | 7-8                |
| Quantitative variables       | 11     | Explain how quantitative variables were handled in the analyses. If applicable, describe which groupings were chosen and why                                                         | 10                 |
| Statistical methods          | 12     | (a) Describe all statistical methods, including those used to control for confounding                                                                                                | 10                 |
|                              |        | (b) Describe any methods used to examine subgroups and interactions                                                                                                                  | 10                 |
|                              |        | (c) Explain how missing data were addressed                                                                                                                                          |                    |
|                              |        | (d) If applicable, describe analytical methods taking account of sampling strategy                                                                                                   | 7-8/10             |
|                              |        | (e) Describe any sensitivity analyses                                                                                                                                                |                    |
| <b>Results</b>               |        |                                                                                                                                                                                      |                    |

|                          |     |                                                                                                                                                                                                              |       |
|--------------------------|-----|--------------------------------------------------------------------------------------------------------------------------------------------------------------------------------------------------------------|-------|
| Participants             | 13* | (a) Report numbers of individuals at each stage of study—eg numbers potentially eligible, examined for eligibility, confirmed eligible, included in the study, completing follow-up, and analysed            | 10-11 |
|                          |     | (b) Give reasons for non-participation at each stage                                                                                                                                                         | 11    |
|                          |     | (c) Consider use of a flow diagram                                                                                                                                                                           |       |
| Descriptive data         | 14* | (a) Give characteristics of study participants (eg demographic, clinical, social) and information on exposures and potential confounders                                                                     | 11    |
|                          |     | (b) Indicate number of participants with missing data for each variable of interest                                                                                                                          |       |
| Outcome data             | 15* | Report numbers of outcome events or summary measures                                                                                                                                                         | 10-11 |
| Main results             | 16  | (a) Give unadjusted estimates and, if applicable, confounder-adjusted estimates and their precision (eg, 95% confidence interval). Make clear which confounders were adjusted for and why they were included | 12-21 |
|                          |     | (b) Report category boundaries when continuous variables were categorized                                                                                                                                    | 10    |
|                          |     | (c) If relevant, consider translating estimates of relative risk into absolute risk for a meaningful time period                                                                                             |       |
| Other analyses           | 17  | Report other analyses done—eg analyses of subgroups and interactions, and sensitivity analyses                                                                                                               |       |
| <b>Discussion</b>        |     |                                                                                                                                                                                                              |       |
| Key results              | 18  | Summarise key results with reference to study objectives                                                                                                                                                     | 22-26 |
| Limitations              | 19  | Discuss limitations of the study, taking into account sources of potential bias or imprecision. Discuss both direction and magnitude of any potential bias                                                   | 25    |
| Interpretation           | 20  | Give a cautious overall interpretation of results considering objectives, limitations, multiplicity of analyses, results from similar studies, and other relevant evidence                                   | 22-26 |
| Generalisability         | 21  | Discuss the generalisability (external validity) of the study results                                                                                                                                        | 22-26 |
| <b>Other information</b> |     |                                                                                                                                                                                                              |       |
| Funding                  | 22  | Give the source of funding and the role of the funders for the present study and, if applicable, for the original study on which the present article is based                                                | 27    |

\*Give information separately for cases and controls in case-control studies and, if applicable, for exposed and unexposed groups in cohort and cross-sectional studies.

**Note:** An Explanation and Elaboration article discusses each checklist item and gives methodological background and published examples of transparent reporting. The STROBE checklist is best used in conjunction with this article (freely available on the Web sites of PLoS Medicine at <http://www.plosmedicine.org/>, Annals of Internal Medicine at <http://www.annals.org/>, and Epidemiology at <http://www.epidem.com/>). Information on the STROBE Initiative is available at [www.strobe-statement.org](http://www.strobe-statement.org).

# BMJ Open

## Epidemiology, etiology and seasonality of infectious diarrhea in adult outpatients through active surveillance in Shanghai, China, 2012-2016: a cross-sectional study

|                                 |                                                                                                                                                                                                                                                                                                                                                                                                                                                                                                                                                                                                                                                                                                                                                                                                                                                                                                                                                                                                                                                                          |
|---------------------------------|--------------------------------------------------------------------------------------------------------------------------------------------------------------------------------------------------------------------------------------------------------------------------------------------------------------------------------------------------------------------------------------------------------------------------------------------------------------------------------------------------------------------------------------------------------------------------------------------------------------------------------------------------------------------------------------------------------------------------------------------------------------------------------------------------------------------------------------------------------------------------------------------------------------------------------------------------------------------------------------------------------------------------------------------------------------------------|
| Journal:                        | <i>BMJ Open</i>                                                                                                                                                                                                                                                                                                                                                                                                                                                                                                                                                                                                                                                                                                                                                                                                                                                                                                                                                                                                                                                          |
| Manuscript ID                   | bmjopen-2017-019699.R2                                                                                                                                                                                                                                                                                                                                                                                                                                                                                                                                                                                                                                                                                                                                                                                                                                                                                                                                                                                                                                                   |
| Article Type:                   | Research                                                                                                                                                                                                                                                                                                                                                                                                                                                                                                                                                                                                                                                                                                                                                                                                                                                                                                                                                                                                                                                                 |
| Date Submitted by the Author:   | 07-Jul-2018                                                                                                                                                                                                                                                                                                                                                                                                                                                                                                                                                                                                                                                                                                                                                                                                                                                                                                                                                                                                                                                              |
| Complete List of Authors:       | Gong, Xiaohuan; Shanghai Municipal Center for Disease Control and Prevention, Division of Infectious Disease Control and Prevention<br>Wu, Huan-yu; Shanghai Municipal Center for Disease Control and Prevention, Division of Infectious Disease Control and Prevention<br>Li, Jian; Ruijin Hospital, Shanghai Jiao Tong University School of Medicine, Shanghai, China., Clinical Research Center<br>Xiao, Wen-jia; Shanghai Municipal Center for Disease Control and Prevention, Division of Infectious Disease Control and Prevention<br>Zhang, Xi; Shanghai Municipal Center for Disease Control and Prevention, Microbiology Laboratory<br>Chen, Min; Shanghai Municipal Center for Disease Control and Prevention, Microbiology Laboratory<br>Teng, Zheng; Shanghai Municipal Center for Disease Control and Prevention, Microbiology Laboratory<br>Pan, Hao; Shanghai Municipal Center for Disease Control and Prevention, Division of Infectious Disease Control and Prevention<br>Yuan, Zheng-an ; Shanghai Municipal Center for Disease Control and Prevention |
| <b>Primary Subject Heading</b>: | Public health                                                                                                                                                                                                                                                                                                                                                                                                                                                                                                                                                                                                                                                                                                                                                                                                                                                                                                                                                                                                                                                            |
| Secondary Subject Heading:      | Epidemiology                                                                                                                                                                                                                                                                                                                                                                                                                                                                                                                                                                                                                                                                                                                                                                                                                                                                                                                                                                                                                                                             |
| Keywords:                       | INFECTIOUS DISEASES, BACTERIOLOGY, VIROLOGY                                                                                                                                                                                                                                                                                                                                                                                                                                                                                                                                                                                                                                                                                                                                                                                                                                                                                                                                                                                                                              |
|                                 |                                                                                                                                                                                                                                                                                                                                                                                                                                                                                                                                                                                                                                                                                                                                                                                                                                                                                                                                                                                                                                                                          |

SCHOLARONE™  
Manuscripts

1  
2  
3  
4 **Epidemiology, etiology and seasonality of infectious**  
5 **diarrhea in adult outpatients through active**  
6 **surveillance in Shanghai, China, 2012-2016: a**  
7 **cross-sectional study**  
8  
9  
10  
11  
12  
13  
14  
15

16  
17 Xiao-huan Gong<sup>1†</sup>, Huan-yu Wu<sup>1†</sup>, Jian Li<sup>2</sup>, Wen-jia Xiao<sup>1</sup>, Xi Zhang<sup>1</sup>, Min Chen<sup>1</sup>,  
18  
19 Zheng Teng<sup>1</sup>, Hao Pan<sup>1\*</sup>, Zheng-an Yuan<sup>1\*</sup>  
20  
21  
22

23 † Equal contributor: Xiao-huan Gong, Huan-yu Wu  
24

25  
26 \* Corresponding author:  
27

28 Zheng-an Yuan  
29

30  
31 Email: yuanzhengan@scdc.sh.cn; Phone:+86 21 62758710  
32

33 Hao Pan  
34

35  
36 Email: panhao@scdc.sh.cn; Phone:+86 21 62758710  
37  
38  
39

40  
41 <sup>1</sup> Division of Infectious Disease Control and Prevention, Division of Pathogen  
42 Detection, Shanghai Municipal Center for Disease Control and Prevention, No. 1380,  
43 West Zhongshan Road, Shanghai 200336, China.  
44

45 <sup>2</sup> Clinical Research Center, Ruijin Hospital, Shanghai Jiao Tong University School of  
46 Medicine, Shanghai, China.  
47  
48  
49

50  
51 **Key Words:**  
52

53 Diarrhea, Surveillance, Epidemiology, Etiology, Sporadic, Bacteria, Virus, China  
54  
55  
56  
57



## Email addresses:

Xiao-huan Gong: [gloriag1988@163.com](mailto:gloriag1988@163.com)

Huan-yu Wu: [wuhuanyu@scdc.sh.cn](mailto:wuhuanyu@scdc.sh.cn)

Jian Li: [lijian@scdc.sh.cn](mailto:lijian@scdc.sh.cn)

Wen-jia Xiao: [xiaowenjia@scdc.sh.cn](mailto:xiaowenjia@scdc.sh.cn)

Xi Zhang: [zhangxi@scdc.sh.cn](mailto:zhangxi@scdc.sh.cn)

Min Chen: [chenmin@scdc.sh.cn](mailto:chenmin@scdc.sh.cn)

Zheng Teng: [tengzheng@scdc.sh.cn](mailto:tengzheng@scdc.sh.cn)

Hao Pan: [panhao@scdc.sh.cn](mailto:panhao@scdc.sh.cn)

Zheng-an Yuan: [yuanzhengan@scdc.sh.cn](mailto:yuanzhengan@scdc.sh.cn)

## ABSTRACT

### Objectives

This study aimed to identify the epidemiology, clinical characteristics, etiology and seasonality of sporadic infectious diarrhea in adults in Shanghai.

### Setting

This study was based on a citywide, active continuous hospital-based diarrhea surveillance network established by Shanghai CDC. There were 22 sentinel hospitals in all 16 districts (9 primary-level hospitals, 6 secondary-level hospitals and 7 tertiary-level hospitals), which were selected using Probability Proportionate to Size (PPS) sampling method.

### Participants

From 1 May 2012 through 31 May 2016, 90713 patients were included in this study. Among 8797 patients whose stool samples were collected and detected, 4392 patients were male.

### Results

The positive rate was 47.96%. Bacterial and viral infections accounted for 27.19% and 69.07% separately. Norovirus was the most common pathogen (43.10%), followed by rotavirus, *V. parahaemolyticus*, *Diarrheagenic Escherichia coli* (DEC) and *Salmonella* spp.. Patients between 30-44 and 45-59 years were more likely to have infectious diarrhea and viral diarrhea. Those aged 30-44 years were the most

likely to get infected with *V. parahaemolyticus* (aOR versus 60+ years: 2.04 [1.47-2.78]) and norovirus (aOR versus 60+ years: 1.32 [1.12-1.56]). Bacterial (except *V. parahaemolyticus*) diarrhea was characterized by fever, abdominal pain and loose stool; whilst viral diarrhea was characterized by nausea, vomiting and watery stool. A seasonal distribution of infectious diarrhea was observed with larger peaks in winter and smaller peaks in summer. Winter peaks were mainly due to norovirus and rotavirus, and summer peaks were due to bacterial infections. An emerging spring peak of norovirus around March was observed in the past 3 years.

## Conclusion

Viral infections were predominant, and norovirus played a leading role. A seasonal distribution was observed and an emerging spring peak of norovirus was noted. Our findings highlight the necessity for conducting an active, comprehensive surveillance in adults, to monitor changing dynamics in the epidemiology and etiology of infectious diarrhea.

## Key Words

Diarrhea, Surveillance, Epidemiology, Etiology, Sporadic, Bacteria, Virus, China

## Strengths and limitations of this study

- ◇ This is the first study in Shanghai identifying the etiology and epidemiology of adult infectious diarrhea in sporadic outpatients from a continuous active diarrhea

1  
2  
3 surveillance enhanced with comprehensive laboratory testing for common enteric  
4  
5  
6 bacteria and virus.

- 7  
8  
9 ✧ Seasonality of adult infectious diarrhea and relevant contribution of different  
10  
11 enteric pathogens in seasonal trend were demonstrated in detail.  
12  
13  
14  
15 ✧ Etiology of adult infectious diarrhea in Shanghai, including bacteria and virus,  
16  
17 was detailed in this study.  
18  
19  
20 ✧ Since information and detection results were collected from 22 hospitals and 16  
21  
22 laboratories, there was a chance of bias caused by different levels and conditions  
23  
24 of hospitals and laboratories. Also admission rate bias and recall bias were  
25  
26 difficult to avoid.  
27  
28  
29 ✧ As for seasonality, only descriptive data of every month or statistical tests of  
30  
31 seasons were demonstrated. No statistical methods were used to analyze the  
32  
33 successive time series.  
34  
35  
36  
37  
38  
39  
40

## 41 **BACKGROUND**

42  
43 Diarrhea is generally characterized by the frequent passage of loose or liquid stools. It  
44  
45 is usually a symptom of gastrointestinal infections caused by bacterial, viral or  
46  
47 parasitic pathogens, which spread through contaminated food or drinking-water or  
48  
49 from person-to-person[1]. According to WHO, rotavirus and *Diarrheagenic*  
50  
51 *Escherichia coli* (DEC) are the two most common etiological agents of diarrhea in  
52  
53 developing countries[1]. However, norovirus was found the most prevalent pathogen  
54  
55  
56  
57

1  
2  
3 of infectious diarrhea in adults in China CDC's research[2], and *Vibrio*  
4  
5  
6 *parahaemolyticus* (*V. parahaemolyticus*) was the most common enteric pathogen in  
7  
8 acute bacterial gastroenteritis[3]. The etiology of infectious diarrhea differs among  
9  
10 regions depending on economic development, local climate and geography [4, 5].  
11

12  
13 Nearly 1.7 billion cases and 1.3 million deaths due to diarrhea occur worldwide every  
14  
15 year.[1, 6] Diarrhea causes substantial medical and healthcare costs and thus has a  
16  
17 high economic impact on society[7]. Diarrhea remains one of the major causes of  
18  
19 disease burden worldwide, despite significant progress in sanitation status and public  
20  
21 health awareness. Mortality due to diarrhea fell 20% in recent 10 years, while it is still  
22  
23 leading common cause of life loss (ranking fifth) globally[6]. To react to this  
24  
25 worldwide health issue, Shanghai CDC have established the Shanghai Diarrhea  
26  
27 Comprehensive Surveillance System since 2012, which is an active continuous  
28  
29 surveillance system this research is based on.  
30  
31  
32  
33

34  
35 Most of current studies of diarrhea have focused on children under 5 years old[8-12].  
36  
37 Consequently, limited data about the epidemiology and etiology of infectious diarrhea  
38  
39 in adults is available[13-15]. Although diarrhea accounts for only 2% deaths of  
40  
41 adults[16], they may play a role in enteric infection transmission to other susceptible  
42  
43 populations such as immunocompromised patients. Furthermore, there is rare research  
44  
45 on the etiology of infectious diarrhea in adults in China[2, 3, 17, 18], especially based  
46  
47 on a continuous active surveillance with comprehensive laboratory detection of  
48  
49 enteric bacteria and viruses. Better understanding of the epidemiology, etiology and  
50  
51 seasonality of infectious diarrhea in adults would be valuable for planning and  
52  
53  
54  
55  
56

1  
2  
3  
4 adopting targeted preventive measures and antimicrobial therapy.

5  
6 The objectives of this study were to identify the epidemiology, clinical characteristics,  
7  
8 etiology and pathogen seasonality of infectious diarrhea in adult sporadic outpatients  
9  
10 through an active continuous hospital-based diarrhea surveillance in Shanghai, and to  
11  
12 explore to develop targeted policy of disease prevention and control in the future.  
13  
14  
15

## 16 **METHODS**

### 17 **Shanghai Diarrhea Comprehensive Surveillance System**

18  
19  
20 The Shanghai Diarrhea Comprehensive Surveillance System conducts active,  
21  
22 population-based surveillance on diarrhea outpatients. It consists of adult surveillance  
23  
24 and children surveillance. The adult surveillance was established with 6 sentinel  
25  
26 hospitals in May 2012, and incorporated 16 additional sentinel hospitals in August  
27  
28 2013. Municipal CDC, district CDCs and sentinel hospitals cooperate to maintain the  
29  
30 surveillance, and share information and detection results through a dedicated online  
31  
32 system. The 22 sentinel hospitals (9 primary-level hospitals, 6 secondary-level  
33  
34 hospitals and 7 tertiary-level hospitals) were selected using Probability Proportionate  
35  
36 to Size (PPS) sampling method among all hospitals which had enteric disease clinics  
37  
38 in all 16 districts of Shanghai. Different sampling intervals were allocated to different  
39  
40 sentinel hospitals considering the hospitals' location(district distribution),  
41  
42 classification(hospital level distribution) and annual number of diarrhea patients  
43  
44 (workload and operability)comprehensively, for use of collecting fecal specimens,  
45  
46 ranging from 3:1 to 20:1.  
47  
48  
49  
50  
51  
52  
53  
54  
55  
56

1  
2  
3  
4  
5  
6  
7  
8  
9  
10  
11  
12  
13  
14  
15  
16  
17  
18  
19  
20  
21  
22  
23  
24  
25  
26  
27  
28  
29  
30  
31  
32  
33  
34  
35  
36  
37  
38  
39  
40  
41  
42  
43  
44  
45  
46  
47  
48  
49  
50  
51  
52  
53  
54  
55  
56  
57  
58  
59  
60

Surveillance subjects were defined as patients who visited the enteric disease clinics of sentinel hospitals, with 3 or more loose or liquid stools per day, or more frequent than normal for the individual (World Health Organization's definition of diarrhea)[19]. Demographic, epidemiological and medical information of all surveillance subjects was obtained using a standardized questionnaire, and recorded into the dedicated online system. Epidemiologically-linked outbreak cases were excluded via inquiry.

### **Patient and Public Involvement**

Patients involved were informed about the development and procedure of the surveillance, and interviewed by doctors in sentinel hospitals.

### **Laboratory Tests**

Fecal specimens were collected from surveillance subjects in accordance with sampling intervals by trained medical staff, as a part of standard medical care. If the sampling interval of a sentinel hospital is X, then fecal specimens are collected from the Xth, 2Xth, 3Xth,...nXth surveillance subjects in this sentinel hospital. Approximately 8~10g (mL) of stool was collected and then dispensed into two containers: (1) a tube with Cary-Blair (C-B) culture medium for bacteria testing and (2) a sterile plastic cup for virus testing. Nucleic Acid was extracted from fecal specimens (20% w/v or v/v suspensions in PBS) using the QIAamp Viral RNA Mini Kit (Qiagen, Hilden, Germany).

All specimens were detected for 8 bacterial pathogens [*Vibrio cholera* (*V. cholera*),

1  
2  
3  
4 *Shigella* spp., *Salmonella* spp., *V. parahaemolyticus*, *Campylobacter jejuni* (*C. jejuni*),  
5  
6 *Yersinia enterocolitica* (*Y. enterocolitica*), *Campylobacter coli* (*C. coli*), DEC  
7  
8 (including EPEC, ETEC, EHEC, EAaggEC, EIEC)], and 5 viral pathogens (norovirus,  
9  
10 rotavirus, astrovirus, sapovirus, and enteric adenovirus). Bacteria were isolated using  
11  
12 different mediums at proper temperatures after preparation. The mediums included  
13  
14 ChromID *Vibrio* and TCBS for *V. cholera* and *V. parahaemolyticus*, MAC for DEC,  
15  
16 XLD for *Shigella* spp. and *Salmonella* spp., etc.. Bacteria were identified using  
17  
18 biochemical tests. An automatic biochemical identification system was used for DEC.  
19  
20 Serum agglutination tests were employed to subtype *Shigella* spp., *Salmonella* spp., *V.*  
21  
22 *cholera* and DEC. Astrovirus, norovirus, sapovirus and rotavirus were detected using  
23  
24 real-time reverse transcription- polymerase chain reaction assays (rRT-PCR) and  
25  
26 enteric adenovirus was detected using rPCR. All molecular assays were performed  
27  
28 using the appropriate respective commercial kits (Shanghai Zhijiang Biotechnology  
29  
30 Co., Ltd.) according to the manufacturer's instructions.  
31  
32  
33  
34  
35  
36  
37  
38 Samples were scored as positive if at least one of enteric pathogens was isolated or  
39  
40 identified. A bacterial infection means enteric bacteria was isolated and no viruses  
41  
42 were identified. A viral infection means enteric virus was identified and no bacteria  
43  
44 were isolated. Samples were scored as simplex infection if one of the 13 enteric  
45  
46 pathogens was isolated or identified; as a mixed infection if at least two of these  
47  
48 pathogens were isolated or identified; as a bacterial-viral mixed infection if at least  
49  
50 one bacteria was isolated and one virus was identified.  
51  
52  
53  
54  
55  
56  
57  
58  
59  
60



## Statistical Analysis

Data were analyzed using Statistical Analysis Software (SAS) version 9.3. Numbers and percentages were computed for categorical variables. Cochren-Mantel-Haenszel test was used for comparison of categorical variables. Binary logistic model and general logit model were used for binary dependent variables and multi-category disordered dependent variables respectively, to calculated adjusted odds ratio (aOR) and to explore the association between etiology and characteristics of infectious diarrhea after adjusting for confounders. Variables of age group, suburb, gender, season, and epidemiological histories were put into model and selected by stepwise methods. Age group, gender, suburb, season, consumption of suspicious food, medical history of enteric disease, and whether to keep a pet were included in the final model. Two-tailed p values  $< 0.05$  was considered statistically significant.

This study focused on the adult diarrhea patients with age  $\geq 18$  years. Age group was defined as 18-29,30-44, 45-59, and 60+ years, according to the Global Burden of Disease 2000 and surveillance diarrhea patients 'age distribution[20]. Patients who visited hospitals in suburb areas were grouped in "suburb". Patients who visited hospitals in rural areas were grouped in "rural". Season was defined by the climatic characteristics of Shanghai, spring means March to May, and summer means June to August, and autumn means September to November, and winter means December to February. Suspicious food meant the suspicious food that patients self reported and doctors thought that may cause diarrhea, such as food which was contaminated by diarrhea pathogen.

## Ethics

The study protocol was approved by the Institutional Ethics Review Committee of the Shanghai Municipal Center for Disease Control and Prevention.

## RESULTS

From 1 May 2012 through 31 May 2016, a total of 95284 patients were enrolled in Shanghai diarrhea comprehensive surveillance system, of whom 4571 (4.80%) were not included in this study for the following reasons: 401 (0.42%) patients did not report clinical signs of diarrhea, 379 (0.40%) patients visited the enteric disease clinics within 14 days and thus were considered as the same episodes, 11 (0.01%) patients sought clinical care > 60 days after onset of diarrhea, 212 (0.22%) patients were not infectious diarrhea and have other explicit diagnosis, and 3568 (3.74%) patients were younger than 18 years. Among 90713 adult diarrhea patients, 8797 (9.70%) patients' stool samples were collected and detected. These 8797 patients were included for further analysis.

### 1. Prevalence of Enteric Bacteria and Viruses

A total of 4657 pathogens were identified or isolated from 4219 (positive rate 47.96%) stool samples of the 8797 samples. There are 1147 bacterial infections (27.19%), 2914 viral infections (69.07%) and 158 bacterial-viral mixed infections (infected with at least 1 bacteria and 1 virus, 3.74%). Excluding mixed-infection samples, *V. parahaemolyticus* infections, DEC infections and *Salmonella* spp. infections were the most frequent bacterial infections, respectively with positive rate 4.50%, 3.43% and

2.90%. Excluding mixed-infection samples, norovirus infections and rotavirus infections were the most frequent viral infections, with positive rates 19.82% and 8.12%, respectively. Positive rates of other enteric viral infections were as follows: sapovirus, 1.93%; astrovirus, 1.56%; and enteric adenovirus, 0.35%. Positive rates of enteric bacterial infections were as follows: *C.jejuni*, 1.13%; *Shigella* spp., 0.22%; *C. coli*, 0.08%; *Y. enterocolitica*, 0.01%; and *Staphylococcus aureus*, 0.01%. In addition, there were 343 (3.90%) mixed infections.

Isolated DEC consisted of 216 ETEC, 131 EPEC, 84 EAggEC, 2 EIEC and 1 EHEC. Identified noroviruses consisted of 281 GI and 1726 GII. Identified rotaviruses consisted of 766 rotavirus group A, 6 rotavirus group B and 15 rotavirus group C.

## 2. Demographic and Epidemiological Characteristics

The median age was 46 (IQR 30-60) years. Of 8797 patients, 22.94% aged 18-29 years, 24.57% aged 30-44 years, 25.79% aged 45-59 years, and 26.70% aged equal to or older than 60 years. A significant difference in positive rate within different age groups could be found among comparison of positive and negative diarrhea patients ( $p=0.0150$ ), comparison of bacterial and viral and bacterial-viral infections ( $p=0.0074$ ), and comparison of different enteric pathogens infections ( $p<0.0001$ ) (Table 1). There were 4392 (49.93%) male patients, with a higher male proportion in positive diarrhea patients ( $p=0.0472$ ), DEC infections (aOR=1.29, 95%CI=1.02-1.64) and norovirus infections (aOR=1.22, 95%CI=1.08-1.36) (Table 1 and Table 2).

Table 1 Demographic and epidemiological characteristics of diarrhea outpatient adults by different infections

|                                                               | Positive<br>(n=4219) | Negative<br>(n=4578) | <i>P</i>          | Bacterial<br>infections<br>(n=1147) | Viral<br>infections<br>(n=2914) | Bacterial-viral<br>Mixed<br>infections<br>(n=158) | <i>P</i>      | <i>V. parahaemolyticus</i> <sup>§</sup><br>(n=396) | DEC <sup>§</sup><br>(n=302) | <i>Salmonella</i><br>spp. <sup>§</sup><br>(n=255) | Norovirus <sup>§</sup><br>(n=1744) | Rotavirus <sup>§</sup><br>(n=714) | Other<br>infections <sup>§</sup><br>(n=808) | <i>P</i>          |
|---------------------------------------------------------------|----------------------|----------------------|-------------------|-------------------------------------|---------------------------------|---------------------------------------------------|---------------|----------------------------------------------------|-----------------------------|---------------------------------------------------|------------------------------------|-----------------------------------|---------------------------------------------|-------------------|
| Gender, N (%)                                                 |                      |                      |                   |                                     |                                 |                                                   |               |                                                    |                             |                                                   |                                    |                                   |                                             |                   |
| Male                                                          | 2153 (51.03)         | 2239 (48.91)         | <b>0.0472</b>     | 577 (50.31)                         | 1497 (51.37)                    | 79 (50.00)                                        | 0.8005        | 184 (46.46)                                        | 164 (54.30)                 | 128 (50.20)                                       | 946 (54.24)                        | 326 (45.66)                       | 405 (50.12)                                 | <b>0.0011</b>     |
| Age, Positive rate (%)                                        |                      |                      |                   |                                     |                                 |                                                   |               |                                                    |                             |                                                   |                                    |                                   |                                             |                   |
| 18-29 years                                                   | 941 (46.70)          | 1074                 | <b>0.0150</b>     | 292 (14.49)                         | 611 (30.32)                     | 38 (1.89)                                         | <b>0.0074</b> | 109 (5.41)                                         | 74 (3.67)                   | 43 (2.13)                                         | 384 (19.06)                        | 118 (5.86)                        | 213 (10.57)                                 | <b>&lt;0.0001</b> |
| 30-44 years                                                   | 1084 (53.80)         | 1074                 |                   | 298 (14.79)                         | 748 (37.12)                     | 38 (1.89)                                         |               | 119 (5.91)                                         | 72 (3.57)                   | 57 (2.83)                                         | 473 (23.47)                        | 158 (7.84)                        | 205 (10.17)                                 |                   |
| 45-59 years                                                   | 1112 (55.19)         | 1153                 |                   | 294 (14.59)                         | 768 (38.11)                     | 50 (2.48)                                         |               | 105 (5.21)                                         | 78 (3.87)                   | 76 (3.77)                                         | 426 (21.14)                        | 231 (11.46)                       | 196 (9.73)                                  |                   |
| 60+ years                                                     | 1079 (53.55)         | 1266                 |                   | 262 (13.00)                         | 786 (39.01)                     | 31 (1.54)                                         |               | 63 (3.13)                                          | 78 (3.87)                   | 78 (3.87)                                         | 460 (22.83)                        | 207 (10.27)                       | 193 (9.58)                                  |                   |
| Living region, Positive rate (%)                              |                      |                      |                   |                                     |                                 |                                                   |               |                                                    |                             |                                                   |                                    |                                   |                                             |                   |
| Suburb                                                        | 2401 (44.66)         | 2975                 | <b>&lt;0.0001</b> | 665 (12.37)                         | 1645 (30.60)                    | 91 (1.69)                                         | 0.6661        | 257 (4.78)                                         | 170 (3.16)                  | 149 (2.77)                                        | 1019 (18.95)                       | 403 (7.50)                        | 403 (7.50)                                  | <b>&lt;0.0001</b> |
| Rural                                                         | 1818 (53.14)         | 1603                 |                   | 482 (14.09)                         | 1269 (37.09)                    | 67 (1.96)                                         |               | 139 (4.06)                                         | 132 (3.86)                  | 255 (3.10)                                        | 725 (21.19)                        | 311 (9.09)                        | 405 (11.84)                                 |                   |
| Epidemiological history, N (%)                                |                      |                      |                   |                                     |                                 |                                                   |               |                                                    |                             |                                                   |                                    |                                   |                                             |                   |
| Had a medical history of enteric disease in the past 6 months | 17 (0.40)            | 47 (1.03)            | <b>0.0006</b>     | 5 (0.44)                            | 12 (0.41)                       | 0 (0.00)                                          | 0.7132        | 1 (0.25)                                           | 1 (0.33)                    | 2 (0.78)                                          | 8 (0.46)                           | 2 (0.28)                          | 3 (0.37)                                    | 0.9001            |
| Had consumed suspicious food within 5 days before onset       | 1914 (45.37)         | 1865 (40.74)         | <b>&lt;0.0001</b> | 490 (42.72)                         | 1350 (46.33)                    | 74 (46.84)                                        | 0.1073        | 179 (45.20)                                        | 111 (36.75)                 | 117 (45.88)                                       | 847 (48.57)                        | 282 (39.50)                       | 378 (46.78)                                 | <b>&lt;0.0001</b> |
| Had went out within 7 days before onset                       | 78 (1.85)            | 46 (1.00)            | <b>0.0010</b>     | 29 (2.53)                           | 48 (1.65)                       | 1 (0.63)                                          | 0.0881        | 7 (1.77)                                           | 8 (2.65)                    | 5 (1.96)                                          | 34 (1.95)                          | 6 (0.84)                          | 18 (2.23)                                   | 0.3226            |
| Had kept or had contact with pets.                            | 814 (19.29)          | 604 (13.19)          | <b>&lt;0.0001</b> | 224 (19.53)                         | 556 (19.08)                     | 34 (21.52)                                        | 0.7304        | 55 (13.89)                                         | 65 (21.52)                  | 41 (16.08)                                        | 323 (18.52)                        | 123 (17.23)                       | 207 (25.62)                                 | <b>&lt;0.0001</b> |

§ Simplex infections;

Bold face:  $P < 0.05$

1  
2  
3  
4  
5  
6 Cochren-Mantel-Haenszel test was used for comparison of categorical variables.  
7  
8  
9  
10  
11  
12  
13  
14  
15  
16  
17  
18  
19  
20  
21  
22  
23  
24  
25  
26  
27  
28  
29  
30  
31  
32  
33  
34  
35  
36  
37  
38  
39  
40  
41  
42  
43  
44  
45  
46  
47

For peer review only

Table 2 Adjusted odds ratio of demographic and epidemiological characteristics comparing positive detection with negative detection in diarrhea outpatients\*

|                                                               | Positive<br>(n=4219)    | Bacterial infections<br>(n=1147) | Viral infections<br>(n=2914) | Bacterial-viral<br>Mixed infections<br>(n=158) | <i>V. parahaemolyticus</i> <sup>§</sup><br>(n=396) | DEC <sup>§</sup><br>(n=302) | <i>Salmonella</i> spp. <sup>§</sup><br>(n=255) | Norovirus <sup>§</sup><br>(n=1744) | Rotavirus <sup>§</sup> (n=714) |
|---------------------------------------------------------------|-------------------------|----------------------------------|------------------------------|------------------------------------------------|----------------------------------------------------|-----------------------------|------------------------------------------------|------------------------------------|--------------------------------|
| Male vs female                                                | 1.09 (1.00-1.19)        | 1.07 (0.94-1.22)                 | 1.1 (0.99-1.22)              | 1.04 (0.75-1.43)                               | 0.89 (0.72-1.09)                                   | <b>1.29 (1.02-1.64)</b>     | 1.11 (0.86-1.44)                               | <b>1.22 (1.08-1.36)</b>            | 0.88 (0.75-1.05)               |
| Age (years)                                                   |                         |                                  |                              |                                                |                                                    |                             |                                                |                                    |                                |
| 18-29                                                         | 1.10 (0.97-1.25)        | <b>1.32 (1.09-1.59)</b>          | 0.99 (0.85-1.14)             | 1.52 (0.93-2.44)                               | <b>1.92 (1.41-2.7)</b>                             | 1.11 (0.79-1.54)            | <b>0.64 (0.44-0.94)</b>                        | 1.03 (0.88-1.22)                   | <b>0.75 (0.58-0.97)</b>        |
| 30-44                                                         | <b>1.28 (1.14-1.45)</b> | <b>1.28 (1.06-1.56)</b>          | <b>1.28 (1.11-1.47)</b>      | 1.54 (0.94-2.50)                               | <b>2.04 (1.47-2.78)</b>                            | 1.02 (0.73-1.43)            | 0.83 (0.58-1.19)                               | <b>1.32 (1.12-1.56)</b>            | 1.08 (0.84-1.35)               |
| 45-59                                                         | <b>1.19 (1.06-1.35)</b> | 1.20 (1.00-1.47)                 | <b>1.16 (1.01-1.33)</b>      | <b>1.85 (1.18-2.94)</b>                        | <b>1.72 (1.25-2.38)</b>                            | 1.06 (0.77-1.47)            | 1.06 (0.76-1.47)                               | 1.09 (0.93-1.28)                   | <b>1.33 (1.08-1.67)</b>        |
| 60+ <sup>¶</sup>                                              | 1.00                    | 1.00                             | 1.00                         | 1.00                                           | 1.00                                               | 1.00                        | 1.00                                           | 1.00                               | 1.00                           |
| Suburb                                                        | <b>0.80 (0.72-0.88)</b> | <b>0.80 (0.68-0.92)</b>          | <b>0.80 (0.71-0.89)</b>      | 0.83 (0.58-1.19)                               | 0.96 (0.76-1.23)                                   | <b>0.75 (0.57-0.98)</b>     | 0.82 (0.62-1.09)                               | <b>0.85 (0.75-0.97)</b>            | <b>0.79 (0.66-0.95)</b>        |
| Had a medical history of enteric disease in the past 6 months | <b>0.41 (0.23-0.73)</b> | 0.42 (0.17-1.08)                 | <b>0.43 (0.22-0.85)</b>      | 0                                              | 0.24 (0.03-1.76)                                   | 0.34 (0.05-2.46)            | 0.71 (0.17-2.94)                               | 0.47 (0.21-1.01)                   | 0.32 (0.07-1.39)               |
| Had consumed suspicious food within 5 days before onset       | <b>1.18 (1.08-1.29)</b> | 1.06 (0.93-1.22)                 | <b>1.24 (1.12-1.38)</b>      | 1.26 (0.82-1.75)                               | 1.22 (0.99-1.51)                                   | 0.84 (0.66-1.08)            | 0.24 (0.96-1.61)                               | <b>1.31 (1.17-1.48)</b>            | 0.99 (0.83-1.18)               |
| Had kept or had contact with pets                             | <b>1.33 (1.17-1.5)</b>  | <b>1.57 (1.30-1.90)</b>          | <b>1.21 (1.04-1.40)</b>      | <b>1.62 (1.05-2.48)</b>                        | 1.17 (0.85-1.63)                                   | <b>1.79 (1.29-2.47)</b>     | 1.20 (0.83-1.75)                               | <b>1.26 (1.06-1.48)</b>            | 1.00 (0.78-1.27)               |

\* Data are adjusted odds ratio (95%CI) in binary logistic model or general logit model

§ Simplex infections

¶ Reference group in logistic regression model

Bold face:  $P < 0.05$

Adjusted odds ratios of age were shown in Table 2. Patients between 30-44 and 45-59 years were more likely to have infectious diarrhea and viral diarrhea. Those aged 30-44 years were the most likely to get infected with *V. parahaemolyticus* (aOR versus 60+ years group: 2.04 [1.47-2.78]) and norovirus (aOR versus 60+ years group: 1.32 [1.12-1.56]). In addition, patients in 18-29 years group had a significantly lower odds of experiencing infectious diarrhea (aOR=0.85, 95% CI=0.76-0.97), viral infections (aOR=0.78, 95% CI=0.67-0.90), norovirus infections (aOR=0.78, 95% CI=0.66-0.92) and rotavirus infections (aOR=0.70, 95% CI=0.54-0.92) compared with 30-44 years group. Patients in 18-29 years group had a significantly lower odds of experiencing viral infections (aOR=0.85, 95% CI=0.74-0.98), *Salmonella* spp. infections (aOR=0.61, 95% CI=0.41-0.89) and rotavirus infections (aOR=0.56, 95% CI=0.44-0.72) compared with 45-59 years group. Patients in 30-44 years group had a significantly higher odds experiencing norovirus infections (aOR=1.22, 95% CI=1.03-1.43) compared with 40-45 years group.

Among diarrhea patients, 5376 (85.67%) visited the hospitals in suburb. The positive rates in suburb and rural groups were significantly different ( $p < 0.0001$ , Table 1). Comparing different enteric pathogen infections, the positive rates of patients in suburb and rural groups were significantly different ( $p < 0.0001$ ). More diarrhea patients infected with *V. parahaemolyticus* (64.90%) lived in suburb areas. Patients living in suburb areas were less likely to get infected with enteric pathogens (aOR=0.75-0.85) except *V. parahaemolyticus* infections and *Salmonella* spp. infections (Table 2).

64 (0.73%) patients had a medical history of enteric disease in the past 6 months. Within 5 days before onset, 3779 (42.96%) patients had a history of consuming suspicious food. 124 (1.41%) patients had a history of going out within 7 days before onset. And 1418 (16.12%) patients kept or had contact with pets. When compared with negative patients, a higher proportion of positive patients had a history of consuming suspicious food within 5 days before onset ( $p<0.0001$ ), had a history of going out within 7 days before onset ( $p=0.0010$ ), and kept or had contact with pets ( $p<0.0001$ ), while a lower proportion had a medical history of enteric disease in the past 6 months ( $p=0.0006$ ) (Table 1). Epidemiological history, including consuming suspicious food and keeping or contacting with pets, was significantly associated with higher odds of infectious diarrhea, viral infections and norovirus infections. A medical history of enteric disease was significantly associated with lower odds of infectious diarrhea (Table 2).

### 3. Clinical Symptoms

Of positive diarrhea patients, 13.11% reported fever, 41.91% reported nausea, 28.21% reported vomiting, and 49.09% reported abdominal pain (Table 3). Watery stool and loose stool were common, respectively accounting for 76.27% and 20.93%. Compared with negative diarrhea patients, positive patients reported more fever ( $p=0.0009$ ), nausea ( $p<0.0001$ ), vomiting ( $p<0.0001$ ) and watery stool ( $p<0.0001$ ), but fewer abdominal pain ( $<0.0001$ ).

The distributions of clinical symptoms by different infections were significantly different (Table 3). Diarrhea patients infected with bacteria reported more fever



1  
2  
3  
4 (19.09%,  $p<0.0001$ ), abdominal pain (64.60%,  $p<0.0001$ ) and loose stool (23.28%,  
5  
6  $p<0.0001$ ). Diarrhea patients infected with virus reported more nausea (43.34%  
7  
8  $p=0.0175$ ), vomiting (30.13%,  $p=0.0001$ ) and watery stool (78.35%,  $p<0.0001$ ).

9  
10 Diarrhea patients infected with *V. parahaemolyticus* featured more nausea (56.27%),  
11  
12 vomiting (41.41%), abdominal pain (71.9%) and watery stool (81.57%). Patients  
13  
14 infected with DEC featured fewer nausea (28.81%) and vomiting (13.58%). Patients  
15  
16 infected with *Salmonella* spp. featured more fever (28.24%). Patients infected with  
17  
18 norovirus featured fewer fever (9.69%) and abdominal pain (44.55%).  
19  
20  
21  
22  
23  
24  
25  
26  
27  
28  
29  
30  
31  
32  
33  
34  
35  
36  
37  
38  
39  
40  
41  
42  
43  
44  
45  
46  
47  
48  
49  
50  
51  
52  
53  
54  
55  
56  
57  
58  
59  
60

**Table 3 Clinical symptoms in diarrhea outpatients by different infections**

|                       | Positive<br>(n=4219) | Negative<br>(n=4578) | <i>P</i>          | Bacterial<br>infections<br>(n=1147) | Viral<br>infections<br>(n=2914) | Bacterial-viral<br>Mixed<br>infections<br>(n=158) | <i>P</i>          | <i>V. parahaemolyticus</i> <sup>§</sup><br>(n=396) | DEC <sup>§</sup><br>(n=302) | <i>Salmonella</i><br>spp. <sup>§</sup><br>(n=255) | Norovirus <sup>§</sup><br>(n=1744) | Rotavirus <sup>§</sup><br>(n=714) | Other<br>infections <sup>§</sup><br>(n=808) | <i>P</i>          |
|-----------------------|----------------------|----------------------|-------------------|-------------------------------------|---------------------------------|---------------------------------------------------|-------------------|----------------------------------------------------|-----------------------------|---------------------------------------------------|------------------------------------|-----------------------------------|---------------------------------------------|-------------------|
| Fever, N (%)          | 553 (13.11)          | 495 (10.81)          | <b>0.0009</b>     | 219 (19.09)                         | 312 (10.71)                     | 22 (13.92)                                        | <b>&lt;0.0001</b> | 46 (11.62)                                         | 43 (14.24)                  | 72 (28.24)                                        | 169 (9.69)                         | 96 (13.45)                        | 127 (15.72)                                 | <b>&lt;0.0001</b> |
| Nausea, N (%)         | 1768 (41.91)         | 1561 (34.10)         | <b>&lt;0.0001</b> | 442 (38.54)                         | 1263 (43.34)                    | 63 (39.87)                                        | <b>0.0175</b>     | 224 (56.27)                                        | 87 (28.81)                  | 71 (27.84)                                        | 790 (45.30)                        | 309 (43.28)                       | 287 (35.52)                                 | <b>&lt;0.0001</b> |
| Vomiting, N (%)       | 1190 (28.21)         | 916 (20.01)          | <b>&lt;0.0001</b> | 269 (23.45)                         | 878 (30.13)                     | 43 (27.22)                                        | <b>0.0001</b>     | 164 (41.41)                                        | 41 (13.58)                  | 37 (14.51)                                        | 595 (34.12)                        | 195 (27.31)                       | 158 (19.55)                                 | <b>&lt;0.0001</b> |
| Abdominal pain, N (%) | 2071 (49.09)         | 2446 (53.43)         | <b>&lt;0.0001</b> | 741 (64.60)                         | 1257 (43.14)                    | 73 (46.20)                                        | <b>&lt;0.0001</b> | 285 (71.97)                                        | 170 (56.29)                 | 151 (59.22)                                       | 777 (44.55)                        | 321 (44.96)                       | 367 (45.42)                                 | <b>&lt;0.0001</b> |
| Fecal property, N (%) |                      |                      |                   |                                     |                                 |                                                   |                   |                                                    |                             |                                                   |                                    |                                   |                                             |                   |
| Watery                | 3218 (76.27)         | 3150 (68.81)         | <b>&lt;0.0001</b> | 814 (70.97)                         | 2283 (78.35)                    | 121 (76.58)                                       | <b>&lt;0.0001</b> | 323 (81.57)                                        | 202 (66.89)                 | 179 (70.20)                                       | 1344 (77.06)                       | 583 (81.65)                       | 587 (72.65)                                 | <b>&lt;0.0001</b> |
| Loose                 | 883 (20.93)          | 1202 (26.26)         |                   | 267 (23.28)                         | 583 (20.01)                     | 33 (20.89)                                        |                   | 54 (13.64)                                         | 85 (28.15)                  | 61 (23.92)                                        | 372 (21.33)                        | 121 (16.95)                       | 190 (23.51)                                 |                   |
| Mucous                | 72 (1.71)            | 143 (3.12)           |                   | 38 (3.31)                           | 31 (1.06)                       | 3 (1.90)                                          |                   | 8 (2.02)                                           | 11 (3.64)                   | 11 (4.31)                                         | 18 (1.03)                          | 6 (0.84)                          | 18 (2.23)                                   |                   |
| Else                  | 46 (1.09)            | 83 (1.81)            |                   | 28 (2.44)                           | 17 (0.58)                       | 1 (0.63)                                          |                   | 11 (2.78)                                          | 4 (1.32)                    | 4 (1.57)                                          | 10 (0.57)                          | 4 (0.56)                          | 13 (1.61)                                   |                   |

§ Simplex infections;

Bold face:  $P < 0.05$

Cochren-Mantel-Haenszel test was used for comparison of categorical variables

#### 4. Pathogen Spectrum and Seasonality

In term of descriptive data, the enteric pathogens spectrum of infectious diarrhea patients displayed a yearly seasonal trend (Figure 1). In general, viruses were predominant during November to March of every seasonal cycle, accounting for more than 80% in every month. Bacteria were predominant during June to August of almost every seasonal cycle, accounting for more than 60% in every month. September and October were the transition period from bacteria to viruses, and April and May were the transition period from viruses to bacteria. Norovirus and rotavirus both showed yearly seasonal trends. Rotavirus peaked in winter months, especially in December and January. Norovirus displayed a less distinct and broader seasonality. Norovirus clustered around autumn and winter, while a smaller peak appeared in March of 2014 and 2015. In the seasonal cycle from 2015-2016, norovirus peaked in March 2016. *V. parahaemolyticus*, DEC and *Salmonella* spp. all showed yearly seasonal trends. These three enteric bacteria peaked in August, and *Salmonella* spp. showed a smaller peak (Figure 2).

Figure 1 insert here.

Figure 2 insert here.

In term of statistical analysis, there were significantly different season distributions in comparison of positive and negative diarrhea patients ( $p < 0.0001$ ), comparison of bacterial and viral and bacterial-viral infections ( $p < 0.0001$ ), and comparison of different enteric pathogens infections ( $p < 0.0001$ ). More bacterial infections appeared in summer (54.58%) and more viral infections appeared in winter (44.51%). The

1  
2  
3 proportion of winter was lower among norovirus infections (34.86%) compared with  
4  
5 among rotavirus infections (67.37%).  
6  
7

8 Patients in summer were 1.55-4.39 times more likely to have simplex bacterial  
9  
10 diarrhea and 0.16-0.20 times less likely to have simplex viral diarrhea compared with  
11  
12 in spring. Patients in autumn were 2.02-3.38 times more likely to have *V.*  
13  
14 *parahaemolyticus* infections and DEC infections, and 0.69-0.77 times less likely to  
15  
16 have simplex viral diarrhea compared with in spring. Patients in winter were  
17  
18 1.60-5.61 times more likely to have simplex viral infections, and 0.14-0.56 times less  
19  
20 likely to have simplex bacterial diarrhea compared with in spring (Table 4).  
21  
22  
23  
24  
25  
26  
27  
28  
29  
30  
31  
32  
33  
34  
35  
36  
37  
38  
39  
40  
41  
42  
43  
44  
45  
46  
47  
48  
49  
50  
51  
52  
53  
54  
55  
56  
57  
58  
59  
60

**Table 4 Seasonality of diarrhea outpatients by different infections\***

|                      | Negative<br>(n=4578) | Positive<br>(n=4219)      | Bacterial<br>infections<br>(n=1147) | Viral infections<br>(n=2914) | Bacterial-viral<br>Mixed<br>infections<br>(n=158) | <i>V. parahaemolyticus</i> <sup>§</sup><br>(n=396) | DEC <sup>§</sup><br>(n=302) | <i>Salmonella</i><br>spp. <sup>§</sup> (n=255) | Norovirus <sup>§</sup><br>(n=1744) | Rotavirus <sup>§</sup><br>(n=714) |
|----------------------|----------------------|---------------------------|-------------------------------------|------------------------------|---------------------------------------------------|----------------------------------------------------|-----------------------------|------------------------------------------------|------------------------------------|-----------------------------------|
| Season [ (No.(%) ]   |                      | <b><i>P</i>&lt;0.0001</b> | <b><i>P</i>&lt;0.0001</b>           |                              |                                                   | <b><i>P</i>&lt;0.0001</b>                          |                             |                                                |                                    |                                   |
| Spring               | 867 (18.94)          | 877 (20.79)               | 149 (12.99)                         | 695 (23.85)                  | 33 (20.89)                                        | 34 (8.59)                                          | 21 (6.95)                   | 41 (16.08)                                     | 462 (26.49)                        | 101 (14.15)                       |
| Summer               | 1746 (38.14)         | 927 (21.97)               | 626 (54.58)                         | 260 (8.92)                   | 41 (25.95)                                        | 252 (63.64)                                        | 178 (58.94)                 | 123 (48.24)                                    | 180 (10.32)                        | 32 (4.48)                         |
| Autumn               | 1238 (27.04)         | 1031 (24.44)              | 322 (28.07)                         | 662 (22.72)                  | 47 (29.75)                                        | 106 (26.77)                                        | 96 (31.79)                  | 72 (28.24)                                     | 494 (28.33)                        | 100 (14.01)                       |
| Winter               | 727 (15.88)          | 1384 (32.80)              | 50 (4.36)                           | 1297 (44.51)                 | 37 (23.42)                                        | 4 (1.01)                                           | 7 (2.32)                    | 19 (7.45)                                      | 608 (34.86)                        | 481 (67.37)                       |
| Season [aOR (95%CI)] |                      |                           |                                     |                              |                                                   |                                                    |                             |                                                |                                    |                                   |
| Spring <sup>¶</sup>  |                      | 1.00                      | 1.00                                | 1.00                         | 1.00                                              | 1.00                                               | 1.00                        | 1.00                                           | 1.00                               | 1.00                              |
| summer               |                      | <b>0.54 (0.48-0.61)</b>   | <b>2.16 (1.77-2.64)</b>             | <b>0.18 (0.16-0.23)</b>      | 0.62 (0.39-1.00)                                  | <b>3.65 (2.53-5.29)</b>                            | <b>4.39 (2.77-6.96)</b>     | <b>1.55 (1.07-2.23)</b>                        | <b>0.20 (0.17-0.24)</b>            | <b>0.16 (0.10-0.24)</b>           |
| autumn               |                      | <b>0.85 (0.75-0.97)</b>   | 1.59 (0.28-1.97)                    | <b>0.69 (0.60-0.79)</b>      | 1.04 (0.66-1.65)                                  | <b>2.2 (1.48-3.28)</b>                             | <b>3.38 (2.09-5.47)</b>     | 1.26 (0.85-1.87)                               | <b>0.77 (0.66-0.9)</b>             | <b>0.69 (0.52-0.93)</b>           |
| winter               |                      | <b>1.91 (1.67-2.18)</b>   | <b>0.40 (0.29-0.56)</b>             | <b>2.26 (1.98-2.59)</b>      | 1.36 (0.84-2.20)                                  | <b>0.14 (0.05-0.40)</b>                            | <b>0.39 (0.16-0.92)</b>     | <b>0.56 (0.32-0.97)</b>                        | <b>1.60 (1.37-1.88)</b>            | <b>5.61 (4.42-7.11)</b>           |

\* Data are adjusted odds ratio (95%CI) in binary logistic model or general logit model

§ Simplex infections;

¶ Reference group in logistic regression model

Bold face:  $P < 0.05$

Cochren-Mantel-Haenszel test was used for comparison of categorical variables

## DISCUSSION

This study is the first study in Shanghai to identify the etiology and epidemiology of adult infectious diarrhea in sporadic outpatients from a continuous active diarrhea surveillance enhanced with comprehensive laboratory testing for common enteric bacteria and virus. It also adds to the limited number of studies investigating adult cases of infectious diarrhea in China. The Shanghai Diarrhea Comprehensive Surveillance System used Probability Proportionate to Size (PPS) sampling method and was conducted among 22 sentinel hospitals in all 16 districts of Shanghai continuously since May 2012, data from which are more representative and more feasible to be extrapolated to the city's population by avoiding the influence of clusters and season-specific cases.

Etiology of adult infectious diarrhea in Shanghai was detailed in this study. At least one enteric pathogen was found in 47.96% of adult diarrhea patients' stools. Viral infections are predominant and bacteria were isolated from many cases. These findings were consistent with those of Wang's research in Beijing[2]. We found that norovirus was the most common enteric pathogen, accounting for over 40% of all cases, followed by rotavirus, *V. parahaemolyticus*, DEC and *Salmonella* spp.. The proportion of norovirus was higher than the sum proportion of rotavirus, *V. parahaemolyticus*, DEC and *Salmonella* spp.. This result confirmed norovirus's leading role in adult infectious diarrhea in China, and was similar to the research finding in sporadic gastroenteritis in both developing and developed countries [21-24]. And it is observed that norovirus infections were more than twice that of rotavirus in

1  
2  
3 adult patients in Shanghai. Rotavirus ranked second to norovirus. This results were  
4  
5 consistent with studies in Russia [24] and Shanghai, China[25], while inconsistent  
6  
7 with study in France[26]. Yet according to WHO, rotavirus is most common  
8  
9 etiological agents of diarrhea in developing countries, which may be due to rotavirus's  
10  
11 important role in children. As the leading cause of severe diarrhea in children, the  
12  
13 pathogenic role and disease burden of rotavirus in adults has been underestimated.  
14  
15 Rotavirus needs more attention in routine clinical diagnosis and vaccination program.  
16  
17 According to this study, *V. parahaemolyticus*, DEC and *Salmonella* spp. were  
18  
19 common bacteria in adult infectious diarrhea. The prevalence of these three bacterial  
20  
21 infections was between 2.90~4.50%, much lower than viral infections. In previous  
22  
23 studies, *V. parahaemolyticus*, DEC and *Salmonella* spp. were also among the most  
24  
25 prevalent pathogen in adult infectious diarrhea in different regions of China and  
26  
27 worldwide[1, 2, 17, 18, 27]. Although diarrhea due to *V. parahaemolyticus* has  
28  
29 decreased since 1998[28, 29], *V. parahaemolyticus* was still the leading cause of adult  
30  
31 bacterial infections in this study. However, *Shigella* spp. was also among frequent  
32  
33 bacteria in several studies before 2013[18, 28, 29]. This study showed that positive  
34  
35 rate of *Shigella* spp. infections was only 0.22% during 2012-2016 in Shanghai, which  
36  
37 may be due to the downward trend of *Shigella* spp. infections over time [29].  
38  
39 This study showed that there was association between adult infectious diarrhea and  
40  
41 patient age. In general, patients between 30-59 years were more likely to have  
42  
43 infectious diarrhea and viral diarrhea than age groups of 18-29 and 60+ years. This  
44  
45 was partly consistent with a study in France which found incidence of acute diarrhea  
46  
47  
48  
49  
50  
51  
52  
53  
54  
55  
56  
57  
58  
59  
60

1  
2  
3 in youth group was higher than elderly group [26]. Elderly people ( $\geq 60$  years) were  
4 the least likely to get infected with *V. parahaemolyticus*, whereas people aged 30-44  
5 years were the most likely among adult age groups. The similar findings were  
6 observed in a study in Shanghai[29]. This may be related to more seafood  
7 consumption in young adults, which is an important risk factor in *V. parahaemolyticus*  
8 infections[30]. In contrast to other studies which found elderly people more likely to  
9 get infected with norovirus[22, 31], our study discovered that the highest proportion  
10 in norovirus infections was 30-44 years old. And considering the results of general  
11 logit model adjusting for other factors, 30-44 years patients were the most likely to  
12 get infected to norovirus. Patients aged 18-29 years had the lowest odds experiencing  
13 rotavirus diarrhea.

14  
15  
16  
17  
18  
19  
20  
21  
22  
23  
24  
25  
26  
27  
28  
29  
30  
31  
32  
33  
34  
35  
36  
37  
38  
39  
40  
41  
42  
43  
44  
45  
46  
47  
48  
49  
50  
51  
52  
53  
54  
55  
56  
57  
58  
59  
60  
People living in rural areas were more susceptible to DEC, norovirus and rotavirus,  
which may be because city environment provided more chances for pathogens to  
transmit.

In regard to clinical symptoms in general, bacterial diarrhea was characterized by  
fever, abdominal pain and loose stool, while viral diarrhea was characterized by  
nausea, vomiting and watery stool. However the symptoms of *V. parahaemolyticus*  
infections showed more like viral infections. In addition, abdominal pain was  
common in *V. parahaemolyticus* infections. These findings of *V. parahaemolyticus*  
were in accordance with a research in Shanghai during 1998-2013[28]. The symptoms  
of DEC and *Salmonella* spp. were similar except fever. The proportion of fever was  
the highest in *Salmonella* spp. (28.24%) while lowest in norovirus (9.69%). The



1  
2  
3  
4 proportion of fever in norovirus infections was much lower in comparison with some  
5  
6 studies[26, 31], while the proportion in *Salmonella* spp. infections was close to  
7  
8 another research [28]. The proportion of abdominal pain was the highest in *V.*  
9  
10 *parahaemolyticus* (71.97%) while much lower in norovirus (44.55%) and rotavirus  
11  
12 (44.96%).

13  
14  
15 This study also demonstrated the seasonality of adult infectious diarrhea and relevant  
16  
17 contribution of different enteric pathogens in seasonal trend. A seasonal distribution of  
18  
19 adult infectious diarrhea was observed with a large peak in winter and a small peak in  
20  
21 summer. Winter peak was mainly due to norovirus and rotavirus, which was in line  
22  
23 with previous study[32, 33]. Summer peak was smaller, due to low proportion of  
24  
25 bacterial infections. What should be noted was that there was a peak around March  
26  
27 due to norovirus in 2014-2016, even higher than the summer peak in 2015-2016  
28  
29 season cycle. This emerging spring peak was possibly because of the increased  
30  
31 activity of a novel norovirus GII.17 [34]. Rotavirus showed a distinct peak in  
32  
33 December and January (significantly winter VS summer aOR=35.67), which was  
34  
35 consistent with researches in Shanghai and Iran [25, 35], while different from a study  
36  
37 in London (peak from January through May) [36] and a study in Russia (peak from  
38  
39 December through May) [24]. However, norovirus displayed a broader seasonality  
40  
41 peaking around autumn and winter (significantly winter VS summer OR=8.00) in this  
42  
43 study and a study in Netherland [9]. Bacterial infections, included *V.*  
44  
45 *parahaemolyticus*, DEC and *Salmonella* spp., showed a yearly seasonality peaking in  
46  
47 summer (often in August), with significantly summer VS winter OR 25.00, 11.11 and  
48  
49  
50  
51  
52  
53  
54  
55  
56

1  
2  
3 2.78 respectively. This was similar in Enserink's study [9], whereas autumn peak of  
4  
5 bacterial infections was observed in some studies [25, 37]. The seasonality of  
6  
7 infectious diarrhea may be due to the climate, biological characteristics of pathogens  
8  
9 and people's diet habit of Shanghai.  
10  
11

12  
13 There are several limitations that need to be acknowledged. First, information and  
14  
15 detection results were collected from 22 hospitals and 16 laboratories. Though  
16  
17 detection methods & materials were unified and regular trainings were held, there was  
18  
19 still a chance of bias caused by the different levels and conditions of hospitals and  
20  
21 laboratories. Admission rate bias should also be taken into consideration as patients  
22  
23 may have a preference when visiting hospitals of different levels or in different  
24  
25 regions. Second, the recall bias of epidemiological information was difficult to avoid.  
26  
27 And the data of exposure history was important for infectious diarrhea. Third, only  
28  
29 diarrhea patients who visited the enteric disease clinics were included in surveillance,  
30  
31 severe diarrhea patients or asymptomatic patients were possibly not studied in our  
32  
33 research. Fourth, as for seasonality, only descriptive data of every month or statistical  
34  
35 tests of seasons were demonstrated. No statistical methods were used to analyze the  
36  
37 successive time series, because of the limit seasonal cycles of existing data. In the  
38  
39 future, after accumulating enough data for several years, time series analysis could be  
40  
41 taken to explore the inherent natural order and to forecast prospective trend.  
42  
43  
44  
45  
46  
47  
48  
49

## 50 **CONCLUSIONS**

51  
52  
53 In conclusion, this study provides a detailed picture about the epidemiology, etiology  
54  
55 and seasonal pathogen spectrum of adult infectious diarrhea in Shanghai. Viral  
56  
57

1  
2  
3 infections are predominant, and norovirus is the most common enteric pathogen  
4  
5 detected in our surveillance. Other common pathogens include rotavirus, *V.*  
6  
7 *parahaemolyticus*, DEC and *Salmonella* spp.. Patients between 30-59 years were  
8  
9 more likely to have infectious diarrhea and viral diarrhea. A seasonal distribution was  
10  
11 observed with larger peaks in winter and smaller peaks in summer. Winter peak was  
12  
13 mainly due to norovirus and rotavirus, and summer peak was due to bacterial  
14  
15 infections. An emerging spring peak of norovirus around March was observed in  
16  
17 recent 3 years. Our findings highlight the necessity for conducting an active,  
18  
19 comprehensive surveillance for both bacterial and viral enteric pathogens in adults, to  
20  
21 monitor the changing dynamics in the epidemiology and etiology of infectious  
22  
23 diarrhea. These findings help us to understand adult infectious diarrhea better and to  
24  
25 develop targeted prevention strategies.  
26  
27  
28  
29  
30  
31

## 32 33 **LIST OF ABBREVIATIONS**

34  
35 aOR: Adjusted odds ratio; *C. coli*: *Campylobacter coli*; *C. jejuni*: *Campylobacter*  
36  
37 *jejuni*; DEC: *Diarrheagenic Escherichia coli*; EAaggEC: Enteroaggregative  
38  
39 escherichia coli; EHEC: Enterohemorrhagic escherichia coli; EIEC: Enteroinvasive  
40  
41 escherichia coli; EPEC: Enteropathogenic escherichia coli; ETEC: Enterotoxigenic  
42  
43 escherichia coli; PPS: Probability Proportionate to Size; rRT-PCR: real-time Reverse  
44  
45 Transcription -Polymerase Chain Reaction; SAS: Statistical Analysis Software; *V.*  
46  
47 *cholera*: *Vibrio cholera*; *V. parahaemolyticus*: *Vibrio parahaemolyticus*; WHO:  
48  
49 World Health Organization; *Y. enterocolitica*: *Yersinia enterocolitica*;  
50  
51  
52  
53  
54  
55  
56  
57

## COMPETING INTERESTS

The authors declare that they have no competing interests.

## AUTHORS' CONTRIBUTIONS

Xiao-huan Gong performed the statistical analysis and drafted the manuscript. Hao Pan and Huan-yu Wu put the surveillance system into effect. Jian Li designed the study of the surveillance system. Wen-jia Xiao participated in the management of the system. Xi Zhang, Min Chen and Zheng Teng carried out the management and quality control of the laboratory tests. Zheng-an Yuan conceived of the study. All authors read and approved of the final manuscript.

## ACKNOWLEDGMENTS

The authors of this study thank all of the patients, the public health workers in the CDCs and health-care workers in the hospitals involved in the surveillance. We are grateful to Fan Wu and Yi He for their intellectual contributions to the study's design. We are grateful to Martin C. W. Chan and She-Lan Liu for their valuable revision advice on the manuscript.

## FUNDING

This work was supported by the 4th Round of Three Years Action Plan on Public of Health of Shanghai: Key Discipline-Epidemiology and Hygiene Microbiology (No. 15GWZK0101), Shanghai Public Health Professional Overseas Training Grant (No. GWTD2015S02), from the Shanghai Municipal Commission of Health & Family

1  
2  
3  
4  
5  
6  
7  
8  
9  
10  
11  
12  
13  
14  
15  
16  
17  
18  
19  
20  
21  
22  
23  
24  
25  
26  
27  
28  
29  
30  
31  
32  
33  
34  
35  
36  
37  
38  
39  
40  
41  
42  
43  
44  
45  
46  
47  
48  
49  
50  
51  
52  
53  
54  
55  
56  
57  
58  
59  
60

Planning.

## DATA SHARING STATEMENT

No additional data are available for public sharing.

## References

1. The World Health Organization, *Diarrhoeal disease*. 2013.
2. Wang, X., et al., *Etiology of Childhood Infectious Diarrhea in a Developed Region of China: Compared to Childhood Diarrhea in a Developing Region and Adult Diarrhea in a Developed Region*. PLoS One, 2015. **10**(11): p. e0142136.
3. Chan, S.S., et al., *Acute bacterial gastroenteritis: a study of adult patients with positive stool cultures treated in the emergency department*. Emerg Med J, 2003. **20**(4): p. 335-8.
4. Thapar, N. and I.R. Sanderson, *Diarrhoea in children: an interface between developing and developed countries*. Lancet, 2004. **363**(9409): p. 641-53.
5. Podewils, L.J., et al., *Acute, infectious diarrhea among children in developing countries*. Seminars in Pediatric Infectious Diseases, 2004. **15**(3): p. 155-168.
6. GBD 2015 Mortality and Causes of Death Collaborators, *Global, regional, and national life expectancy, all-cause mortality, and cause-specific mortality for 249 causes of death, 1980 – 2015: a systematic analysis for the Global Burden of Disease Study 2015*. Lancet, 2016. **388**(10053): p. 1459-544.
7. JONES, T.F., et al., *A population-based estimate of the substantial burden of diarrhoeal disease in the United States; FoodNet, 1996 – 2003*. 2007. p. 293-301.
8. Benhafid, M., et al., *Epidemiology of Rotavirus Gastroenteritis among Children <5 Years of Age in Morocco during 1 Year of Sentinel Hospital Surveillance, June 2006 – May 2007*. The Journal of Infectious Diseases, 2009. **200**(s1): p. S70-S75.
9. Enserink, R., et al., *Gastroenteritis Attributable to 16 Enteropathogens in Children Attending Day Care*. 2015. p. 5-10.
10. Chhabra, P., et al., *Etiology of Viral Gastroenteritis in Children <5 Years of Age in the United States, 2008-2009*. The Journal of Infectious Diseases, 2013. **208**(5): p. 790-800.
11. Grant, L., et al., *Epidemiologic and clinical features of other enteric viruses associated with acute gastroenteritis in American Indian infants*. J Pediatr, 2012. **161**(1): p. 110-5.e1.
12. Fletcher, S., et al., *Gastrointestinal pathogen distribution in symptomatic children in Sydney, Australia*. J Epidemiol Glob Health, 2013. **3**(1): p. 11-21.
13. Sambe-Ba, B., et al., *Community-acquired diarrhea among children and adults in urban settings in Senegal: clinical, epidemiological and microbiological aspects*. BMC Infectious Diseases, 2013. **13**: p. 580.
14. Franck, K.T., et al., *Norovirus epidemiology in community and health care settings and association with patient age, Denmark*. 2014. p. 1123-31.
15. Parry, C.M., et al., *A retrospective study of secondary bacteraemia in hospitalised adults with*

- community acquired non-typhoidal *Salmonella* gastroenteritis. *BMC Infectious Diseases*, 2013. **13**: p. 107.
16. Lozano, R., et al., *Global and regional mortality from 235 causes of death for 20 age groups in 1990 and 2010: a systematic analysis for the Global Burden of Disease Study 2010*. *Lancet*, 2012. **380**(9859): p. 2096-2128.
17. Dong, B., et al., *Bacterial Etiologies of Five Core Syndromes: Laboratory-Based Syndromic Surveillance Conducted in Guangxi, China*. *PLoS One*, 2014. **9**(10): p. e110876.
18. Qu, M., et al., *Etiology of acute diarrhea due to enteropathogenic bacteria in Beijing, China*. *Journal of Infection*, 2012. **65**(3): p. 214-222.
19. WHO, *Diarrhoea*. <http://www.who.int/topics/diarrhoea/en/>. 2016.
20. Mathers, C.D., et al., *Global Burden of Disease 2000: Version 2 methods and results*. 2002, WHO.
21. Tam, C.C., et al., *Longitudinal study of infectious intestinal disease in the UK (IID2 study): incidence in the community and presenting to general practice*. *Gut*, 2012. **61**(1): p. 69-77.
22. Patel, M.M., et al., *Systematic literature review of role of noroviruses in sporadic gastroenteritis*. *Emerg Infect Dis*, 2008. **14**(8): p. 1224-31.
23. Morillo, S.G. and M.C. Timenetsky, *Norovirus: an overview*. *Rev Assoc Med Bras* (1992), 2011. **57**(4): p. 453-8.
24. Podkolzin, A.T., et al., *Hospital - Based Surveillance of Rotavirus and Other Viral Agents of Diarrhea in Children and Adults in Russia, 2005 - 2007*. *The Journal of Infectious Diseases*, 2009. **200**(s1): p. S228-S233.
25. Wang, Y., J. Zhang and P. Liu, *Clinical and molecular epidemiologic trends reveal the important role of rotavirus in adult infectious gastroenteritis, in Shanghai, China*. *Infect Genet Evol*, 2016.
26. Arena, C., et al., *Acute diarrhea in adults consulting a general practitioner in France during winter: incidence, clinical characteristics, management and risk factors*. *Bmc Infectious Diseases*, 2014. **574** (14): p. 1-7.
27. Liu, H.X. and J. Zhang, *[Analysis of reported infectious diarrhea (other than cholera, dysentery, typhoid and paratyphoid) in China in 2011]*. *Zhonghua Yu Fang Yi Xue Za Zhi*, 2013. **47**(4): p. 328-32.
28. Qi, X.L., et al., *Incidence rates and clinical Symptoms of Salmonella, Vibrio parahaemolyticus, and Shigella infections in China, 1998-2013*. *J Infect Dev Ctries*, 2016. **10**(2): p. 127-33.
29. Zhang, Y., et al., *Analysis of bacterial pathogens causing acute diarrhea on the basis of sentinel surveillance in Shanghai, China, 2006-2011*. *Jpn J Infect Dis*, 2014. **67**(4): p. 264-8.
30. Su, Y. and C. Liu, *Vibrio parahaemolyticus: A concern of seafood safety*. *Food Microbiology*, 2007. **24**(6): p. 549-558.
31. Tang, M.B., et al., *Epidemiological and molecular analysis of human norovirus infections in Taiwan during 2011 and 2012*. *BMC Infectious Diseases*, 2013. **13**: p. 338.
32. Karsten, C., et al., *Incidence and risk factors for community-acquired acute gastroenteritis in north-west Germany in 2004*. 2009. **28**(8): p. 935 - 43.
33. de Wit, M.A., et al., *Gastroenteritis in sentinel general practices, The Netherlands*. 2001. **7**(1): p. 82 - 91.
34. Gao, Z., et al., *Increased norovirus activity was associated with a novel norovirus GII.17 variant in Beijing, China during winter 2014 - 2015*. *BMC Infectious Diseases*, 2015. **15**(1).

- 1
- 2
- 3 35. Eesteghamati, A., et al., *Sentinel Hospital - Based Surveillance of Rotavirus Diarrhea in Iran*. The Journal of Infectious Diseases, 2009. **200**(s1): p. S244-S247.
- 4
- 5 36. Iturriza Gómara, M., et al., *Rotavirus Surveillance in Europe, 2005 - 2008: Web - Enabled*
- 6 *Reporting and Real - Time Analysis of Genotyping and Epidemiological Data*. The Journal of
- 7 *Infectious Diseases*, 2009. **200**(s1): p. S215-S221.
- 8
- 9 37. Liang, Z., et al., *Serotypes, seasonal trends, and antibiotic resistance of non-typhoidal Salmonella*
- 10 *from human patients in Guangdong Province, China, 2009 - 2012*. BMC Infectious Diseases,
- 11 2015. **15**(1): p. 53.
- 12
- 13
- 14
- 15
- 16
- 17
- 18
- 19
- 20
- 21
- 22
- 23
- 24
- 25
- 26
- 27
- 28
- 29
- 30
- 31
- 32
- 33
- 34
- 35
- 36
- 37
- 38
- 39
- 40
- 41
- 42
- 43
- 44
- 45
- 46
- 47
- 48
- 49
- 50
- 51
- 52
- 53
- 54
- 55
- 56
- 57
- 58
- 59
- 60

For peer review only

1  
2  
3  
4  
5  
6  
7  
8  
9  
10  
11  
12  
13  
14  
15  
16  
17  
18  
19  
20  
21  
22  
23  
24  
25  
26  
27  
28  
29  
30  
31  
32  
33  
34  
35  
36  
37  
38  
39  
40  
41  
42  
43  
44  
45  
46  
47  
48  
49  
50  
51  
52  
53  
54  
55  
56  
57  
58  
59  
60

**Figure 1 Pathogen spectrum of major enteric pathogens in adults with infectious diarrhea by month in Shanghai, May 2012-May 2016**

**Figure2 Seasonality of major enteric pathogens in adult with infectious diarrhea in Shanghai, May 2012-May 2016**

For peer review only





Figure 1 Pathogen spectrum of major enteric pathogens in adults with infectious diarrhea by month in Shanghai, May 2012-May 2016

Figure 1 Pathogen spectrum of major enteric pathogens in adults with infectious diarrhea by month in Shanghai, May 2012-May 2016

297x210mm (300 x 300 DPI)

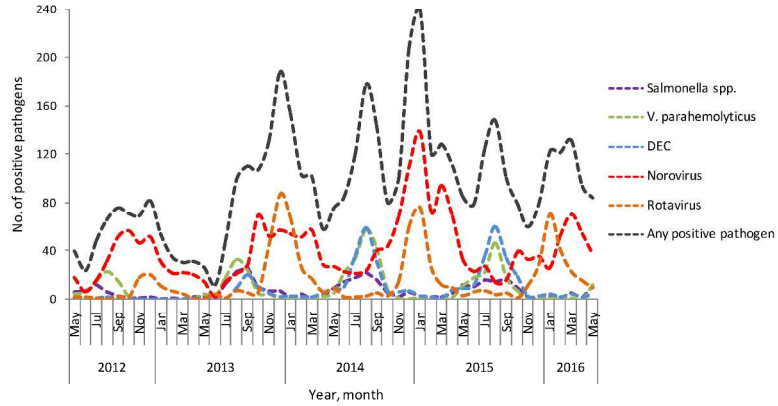

Figure2 Seasonality of major enteric pathogens in adult with infectious diarrhea in Shanghai, May 2012-May 2016

Figure2 Seasonality of major enteric pathogens in adult with infectious diarrhea in Shanghai, May 2012-May 2016

297x210mm (300 x 300 DPI)

**STROBE 2007 (v4) Statement—Checklist of items that should be included in reports of *cross-sectional studies***

| Section/Topic                | Item # | Recommendation                                                                                                                                                                       | Reported on page # |
|------------------------------|--------|--------------------------------------------------------------------------------------------------------------------------------------------------------------------------------------|--------------------|
| <b>Title and abstract</b>    | 1      | (a) Indicate the study's design with a commonly used term in the title or the abstract                                                                                               | 3                  |
|                              |        | (b) Provide in the abstract an informative and balanced summary of what was done and what was found                                                                                  | 3                  |
| <b>Introduction</b>          |        |                                                                                                                                                                                      |                    |
| Background/rationale         | 2      | Explain the scientific background and rationale for the investigation being reported                                                                                                 | 6                  |
| Objectives                   | 3      | State specific objectives, including any prespecified hypotheses                                                                                                                     | 7                  |
| <b>Methods</b>               |        |                                                                                                                                                                                      |                    |
| Study design                 | 4      | Present key elements of study design early in the paper                                                                                                                              | 7-8                |
| Setting                      | 5      | Describe the setting, locations, and relevant dates, including periods of recruitment, exposure, follow-up, and data collection                                                      | 7-8                |
| Participants                 | 6      | (a) Give the eligibility criteria, and the sources and methods of selection of participants                                                                                          | 7-8                |
| Variables                    | 7      | Clearly define all outcomes, exposures, predictors, potential confounders, and effect modifiers. Give diagnostic criteria, if applicable                                             | 8-9                |
| Data sources/<br>measurement | 8*     | For each variable of interest, give sources of data and details of methods of assessment (measurement). Describe comparability of assessment methods if there is more than one group | 7-10               |
| Bias                         | 9      | Describe any efforts to address potential sources of bias                                                                                                                            | 7-10               |
| Study size                   | 10     | Explain how the study size was arrived at                                                                                                                                            | 7-8                |
| Quantitative variables       | 11     | Explain how quantitative variables were handled in the analyses. If applicable, describe which groupings were chosen and why                                                         | 10                 |
| Statistical methods          | 12     | (a) Describe all statistical methods, including those used to control for confounding                                                                                                | 10                 |
|                              |        | (b) Describe any methods used to examine subgroups and interactions                                                                                                                  | 10                 |
|                              |        | (c) Explain how missing data were addressed                                                                                                                                          |                    |
|                              |        | (d) If applicable, describe analytical methods taking account of sampling strategy                                                                                                   | 7-8/10             |
|                              |        | (e) Describe any sensitivity analyses                                                                                                                                                |                    |
| <b>Results</b>               |        |                                                                                                                                                                                      |                    |

|                          |     |                                                                                                                                                                                                              |       |
|--------------------------|-----|--------------------------------------------------------------------------------------------------------------------------------------------------------------------------------------------------------------|-------|
| Participants             | 13* | (a) Report numbers of individuals at each stage of study—eg numbers potentially eligible, examined for eligibility, confirmed eligible, included in the study, completing follow-up, and analysed            | 10-11 |
|                          |     | (b) Give reasons for non-participation at each stage                                                                                                                                                         | 11    |
|                          |     | (c) Consider use of a flow diagram                                                                                                                                                                           |       |
| Descriptive data         | 14* | (a) Give characteristics of study participants (eg demographic, clinical, social) and information on exposures and potential confounders                                                                     | 11    |
|                          |     | (b) Indicate number of participants with missing data for each variable of interest                                                                                                                          |       |
| Outcome data             | 15* | Report numbers of outcome events or summary measures                                                                                                                                                         | 10-11 |
| Main results             | 16  | (a) Give unadjusted estimates and, if applicable, confounder-adjusted estimates and their precision (eg, 95% confidence interval). Make clear which confounders were adjusted for and why they were included | 12-21 |
|                          |     | (b) Report category boundaries when continuous variables were categorized                                                                                                                                    | 10    |
|                          |     | (c) If relevant, consider translating estimates of relative risk into absolute risk for a meaningful time period                                                                                             |       |
| Other analyses           | 17  | Report other analyses done—eg analyses of subgroups and interactions, and sensitivity analyses                                                                                                               |       |
| <b>Discussion</b>        |     |                                                                                                                                                                                                              |       |
| Key results              | 18  | Summarise key results with reference to study objectives                                                                                                                                                     | 22-26 |
| Limitations              | 19  | Discuss limitations of the study, taking into account sources of potential bias or imprecision. Discuss both direction and magnitude of any potential bias                                                   | 25    |
| Interpretation           | 20  | Give a cautious overall interpretation of results considering objectives, limitations, multiplicity of analyses, results from similar studies, and other relevant evidence                                   | 22-26 |
| Generalisability         | 21  | Discuss the generalisability (external validity) of the study results                                                                                                                                        | 22-26 |
| <b>Other information</b> |     |                                                                                                                                                                                                              |       |
| Funding                  | 22  | Give the source of funding and the role of the funders for the present study and, if applicable, for the original study on which the present article is based                                                | 27    |

\*Give information separately for cases and controls in case-control studies and, if applicable, for exposed and unexposed groups in cohort and cross-sectional studies.

**Note:** An Explanation and Elaboration article discusses each checklist item and gives methodological background and published examples of transparent reporting. The STROBE checklist is best used in conjunction with this article (freely available on the Web sites of PLoS Medicine at <http://www.plosmedicine.org/>, Annals of Internal Medicine at <http://www.annals.org/>, and Epidemiology at <http://www.epidem.com/>). Information on the STROBE Initiative is available at [www.strobe-statement.org](http://www.strobe-statement.org).
